# Supplementary material for: Preparing glycosyl benzothiazoles from 2-isocyanoaryl thioethers and glycosyl radicals under thermal conditions
Source: Royal Society of Chemistry journal article supplement (doi:10.1039/d4cc00648h), 2024-01-01
Supplement: d4cc00648h1.pdf [file d4cc00648h1.pdf]

## Supporting Information

# Preparing glycosyl benzothiazoles from 2-Isocyanoaryl Thioethers and Glycosyl Radicals under thermal conditions

Daqi Liu, Yang Zhang,\* and Dawen Niu\*

*Department of Emergency, State Key Laboratory of Biotherapy and Cancer Center, West China Hospital, and School of Chemical Engineering, Sichuan University, Chengdu 610041, China.*

### Contents

|                                                                      |     |
|----------------------------------------------------------------------|-----|
| 1. General Information                                               | S2  |
| 2. Condition Optiomization                                           | S3  |
| 3. General Procedures for the Synthesis of Glycosyl Benzothiazoles   | S3  |
| 4. General Procedure of Gram-Scale Synthesis                         | S4  |
| 5. Procedure of Mechanism Experiment                                 | S4  |
| 6. General Procedures for the Synthesis of Glycosyl Radical Donors   | S5  |
| 7. General Procedures for the Synthesis of 2-Isocyanoaryl Thioethers | S7  |
| 8. Characterization Data for Glycosyl Benzothiazoles:                | S8  |
| 9. Reference                                                         | S20 |
| 10. NMR Spectra                                                      | S20 |

## 1. General Information

Flash column chromatography was performed using silica gel (300-400 mesh) purchased from Qindao Haiyang. Reaction solvents and deuterated solvents were purchased from Energy Chemicals and used as received. 2,2'-azobis(2-methylpropionitrile) (AIBN), heterocyclic compounds and glycosyl substrates were purchased from Adamas or Energy Chemicals and used as received. NMR yields were determined using 1,3,5-trimethoxybenzene as an internal standard. Unless otherwise noted, all reported yields are isolated yields of purified products. All new compounds were characterized by NMR spectroscopy, IR spectroscopy, high-resolution mass spectroscopy (HR-MS), and melting point (if solids). NMR spectra were recorded on a Bruker AMX 400 spectrometer and were calibrated using TMS (0.00 ppm) or residual deuterated solvent as an internal reference (CDCl<sub>3</sub>: 7.26 ppm for <sup>1</sup>H NMR and 77.16 ppm for <sup>13</sup>C NMR; DMSO-*d*<sub>6</sub>: 2.50 ppm for <sup>1</sup>H NMR and 39.50 ppm for <sup>13</sup>C NMR; CD<sub>3</sub>OD: 3.31 ppm for <sup>1</sup>H NMR and 49.50 ppm for <sup>13</sup>C NMR), and the tabulated data were reported in ppm. All IR spectra were taken on Thermo Scientific Nicolet iS5 spectrometer (iD5 ATR, diamond). HR-MS spectra were recorded on a Waters Q-TOF Premier. Melting points (m. p.) were recorded on an INESA SGW X-4 melting point apparatus. Optical rotations were measured on a Hanon P850 polarimeter with  $[\alpha]_D^T$  values reported in degrees; concentration (c) is in g/100 mL.

## 2. Condition Optimomization

Table S1. Other Representative Conditions Not Listed in Table 1

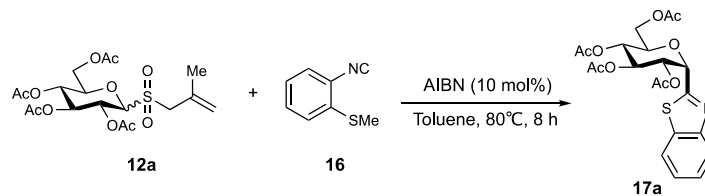

| Entry | Variation from standard conditions | Yield of <b>12a</b> |
|-------|------------------------------------|---------------------|
| 1     | MeCN instead of Toluene            | 76%                 |
| 2     | THF instead of Toluene             | 65%                 |
| 3     | DMF instead of Toluene             | 47%                 |
| 4     | 60 °C Instead of 80 °C             | trace               |
| 5     | with 20% AIBN                      | 92%                 |
| 6     | <b>16</b> (1.5 equiv.)             | 81%                 |
| 7     | DTBP instead of AIBN               | 46%                 |
| 8     | TBPB instead of AIBN               | 45%                 |
| 9     | DCE instead of Toluene             | 79%                 |

<sup>a</sup>Reaction condition: **12a** (0.1 mmol, 1 equiv.), **16** (0.2 mmol, 2 equiv.), AIBN (10 mol%), Solvent (1 mL). The yield was determined by <sup>1</sup>H NMR analysis using 1,3,5-trimethoxybenzene as the internal standard.

## 3. General Procedures for the Synthesis of Glycosyl Benzothiazoles

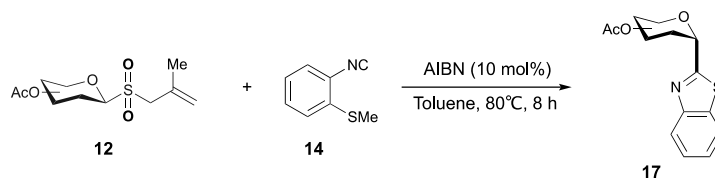

Allyl glycosyl sulfone (1.0 equiv.), Isocyanide (2.0 equiv.), 2,2'-azobis(2-methylpropionitrile) (AIBN) (10 mmol%) were weighted into a screw-capped vial containing a magnetic stir bar. The vial was loosely capped and transferred into a nitrogen-filled glovebox. To the vial was added Toluene (0.4 M). The vial was tightly sealed with a Teflon-lined cap and stirred at 80 °C the indicated period of time. The reaction mixture was monitored by TLC using as the mobile phase. After disappearance of starting material, the solvent of reaction was concentrated under reduced pressure. The residue was subjected to silica gel chromatography to give the glycoside product.

## 4. General Procedure of Gram-Scale Synthesis

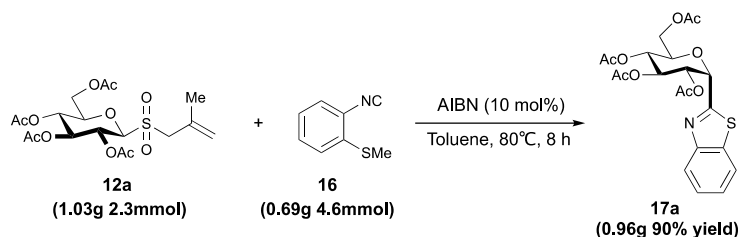

The glucose allyl glycosyl sulfone **12a** (2.3 mmol, 1.03 g), Isocyanide **16** (4.6 mmol, 0.69g), 2,2'-azobis(2-methylpropionitrile) (AIBN) (0.23 mmol, 0.038g) were weighted into a screw-capped vial containing a magnetic stir bar. The vial was loosely capped and transferred into a nitrogen-filled glovebox. To the vial was added Toluene (10 mL). The vial was tightly sealed with a Teflon-lined cap and stirred at 80 °C for 12 h. The reaction mixture was monitored by TLC using as the mobile phase. After disappearance of starting material, the solvent of reaction was concentrated under reduced pressure. The residue was subjected to silica gel chromatography to give the glycoside product. The residue was subjected to silica gel chromatography to give the glycoside product **17a** (90%, 0.96 g). (The reaction phenomenon: The reaction liquid was light yellow at first, and the color of the reaction liquid gradually deepened as the reaction progressed, and finally turned brown.)

## 5. Procedure of Mechanism Experiment

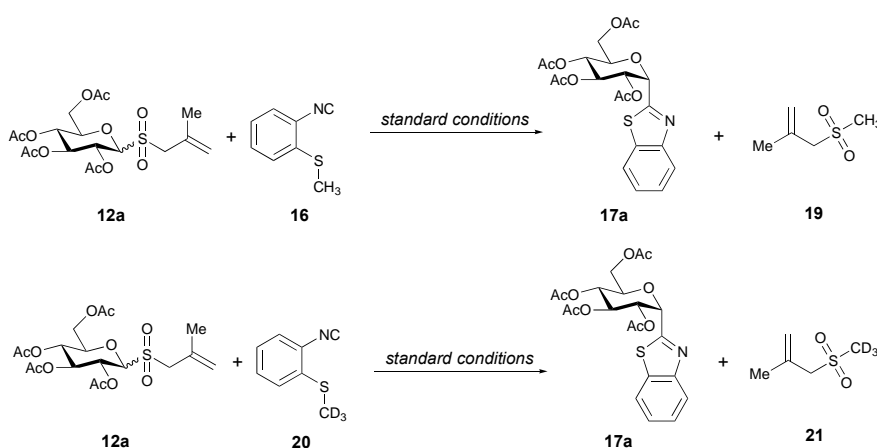

Allyl glycosyl sulfone **12a** (1.0 equiv.), Isocyanide **16** or **20** (2.0 equiv.), 2,2'-azobis(2-methylpropionitrile) (AIBN) (10 mmol%) were weighted into a screw-capped vial containing a magnetic stir bar. The vial was loosely capped and transferred into a nitrogen-filled glovebox. To the vial was added Toluene (0.4 M). The vial was tightly sealed with a Teflon-lined cap and stirred at 80 °C the indicated period of time. The reaction mixture was monitored by TLC using as the mobile phase. After disappearance of starting material, the solvent of reaction was

concentrated under reduced pressure. The residue was subjected to silica gel chromatography to give the corresponding byproduct **19** or **21**.

## 6. General Procedures for the Synthesis of Glycosyl Radical Donors

**12a**, **12b**, **12c**, **12d**, **12e**, **12h**, **12i** and **12j** were prepared according to general procedure A. **12f** and **12g** were prepared according to general procedure B. **12k** was prepared from the deprotection of **12a** according to general procedure C. All of characterization data had been reported in our previous work<sup>1-2</sup>.

### Substrate scope of the glycosyl donors:

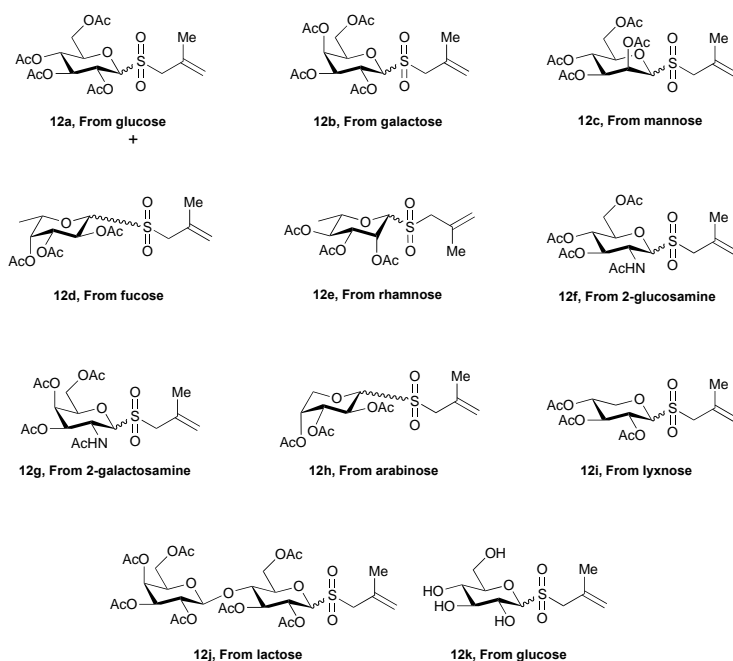

### General Procedure A:

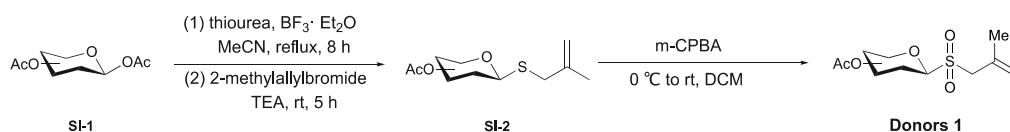

Step I: To a solution of **SI-1** (1.0 equiv.) and thiourea (1.5 equiv.) in MeCN was added  $\text{BF}_3 \cdot \text{Et}_2\text{O}$  (1.5 equiv.) dropwise at room temperature. The resulting mixture was heated reflux about 8 hours, stirred until **SI-1** was consumed completely by TLC analysis. Without further operation, TEA (1.5 equiv.) and 2-methylallylbromide (1.5 equiv.) were added to the resulting mixture. The resulting mixture was stirred at room temperature about 5 hours and then diluted by addition of EA. The organic phase was separated and washed by sat. aq.  $\text{NaHCO}_3$  ( $\times 2$ ), brine ( $\times 1$ ), dried over anhydrous  $\text{Na}_2\text{SO}_4$ , filtered, concentrated in vacuo, and purified by flash chromatography ( $\text{SiO}_2$ ) to afford **SI-2**.

Step II: To a stirred solution of **SI-2** (1.0 equiv.) in DCM was added m-CPBA (2.5 equiv.) at  $0^\circ\text{C}$ . The resulting mixture was then stirred at the same temperature until **SI-2** was fully consumed as monitored by TLC (ca. 2~3 h). The reaction was quenched by addition of sat. aq.

NaHCO<sub>3</sub> at 0°C. The resulting mixture was allowed to warm up to ambient temperature. The organic phase was separated and washed by sat. aq. NaHCO<sub>3</sub> (×3), brine (×1), dried over anhydrous Na<sub>2</sub>SO<sub>4</sub>, filtered, concentrated in vacuo, and purified by flash chromatography (SiO<sub>2</sub>) to afford glycosyl radical **Donors 1**.

### General Procedure B:

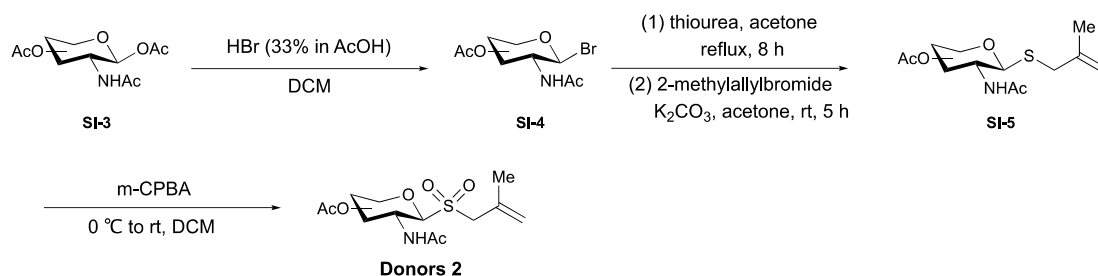

Step I: **SI-3** (1.0 equiv.) was dissolved in DCM, then Hydrogen bromide (33 wt.% in Acetic acid, Energy Seal) was added slowly into the reaction at 0°C. The reaction mixture was stirred at 0°C overnight. The reaction was quenched with ice-water and extracted with DCM (×3). The organic phase was separated and washed by sat. aq. NaHCO<sub>3</sub> (×3), brine (×1), dried over anhydrous Na<sub>2</sub>SO<sub>4</sub>, filtered, concentrated in vacuo, and purified by flash chromatography (SiO<sub>2</sub>) to afford **SI-4**.

Step II: **SI-4** (1.0 equiv.) was dissolved in acetone, then thiourea (1.5 equiv.) was added. The resulting mixture was refluxed about 8 hours, stirred until **SI-4** was consumed completely by TLC analysis. Without further operation, H<sub>2</sub>O (acetone/ H<sub>2</sub>O = 1/1), K<sub>2</sub>CO<sub>3</sub> (3.0 equiv.) and 2-methylallylbromide (1.5 equiv.) were added to the resulting mixture. The resulting mixture was stirred at room temperature about 5 hours and then diluted by addition of EA. The organic phase was separated and washed by sat. aq. NaHCO<sub>3</sub> (×2), brine (×1), dried over anhydrous Na<sub>2</sub>SO<sub>4</sub>, filtered, concentrated in vacuo, and purified by flash chromatography (SiO<sub>2</sub>) to afford **SI-5**.

Step III: To a stirred solution of **SI-5** (1.0 equiv.) in DCM was added m-CPBA (2.5 equiv.) at 0°C. The resulting mixture was then stirred at the same temperature until **SI-5** was fully consumed as monitored by TLC (ca. 2~3 h). The reaction was quenched by addition of sat. aq. NaHCO<sub>3</sub> at 0°C. The resulting mixture was allowed to warm up to ambient temperature. The organic phase was separated and washed by sat. aq. NaHCO<sub>3</sub> (×3), brine (×1), dried over anhydrous Na<sub>2</sub>SO<sub>4</sub>, filtered, concentrated in vacuo, and purified by flash chromatography (SiO<sub>2</sub>) to afford glycosyl radical **Donors 2**.

### General Procedure C:

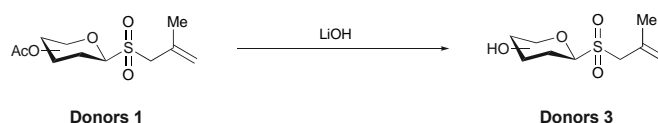

Donors 1 was dissolved in 20 mL MeOH at 0 °C, to which LiOH (0.5 equiv.) was added. The reaction was allowed to stir at 0 °C for 2 h. Silica gel was added to the mixture, which is then concentrated in vacuo. The resulting mixture was dry-loaded onto silica gel column, and eluted to give the corresponding polyols **Donors 3**.

## 7. General Procedures for the Synthesis of 2-Isocyanoaryl Thioethers

**16, 14a, 14b, 14c, 14d, 14e, 14f, 14g, 14h, 14i, 14j, 14k** and **20** were prepared according to general procedure D. All of characterization data had been reported<sup>3-4</sup>.

### Substrate scope of the Isocyanides:

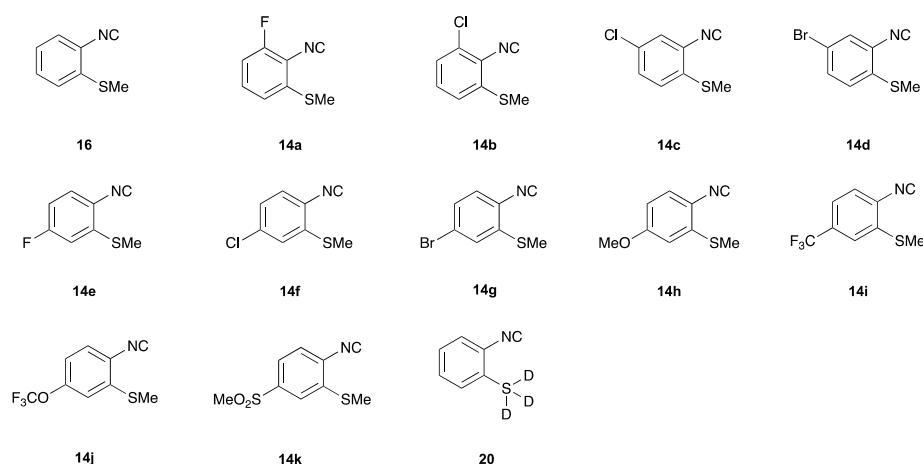

### General Procedure D:

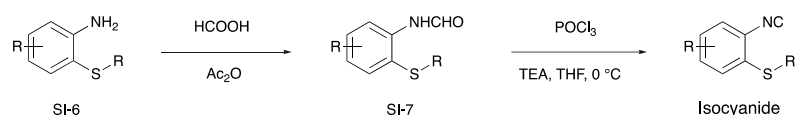

Step1: Acetic formic anhydride (0.89 mL) was added dropwise to a stirred solution of **SI-6** (4.30 mmol) at 0°C in DCM (8 mL). The mixture was stirred for 2 h at room temperature. Then, the mixture was quenched with saturated aqueous solution of Na<sub>2</sub>CO<sub>3</sub> and extracted with DCM for three times. The organic phase was dried over Na<sub>2</sub>SO<sub>4</sub> and concentrated under reduced pressure to give the formamide **SI-7** as pale-yellow oil. This compound was used for the subsequent dehydration without further purification.

Step 2: THF (8 mL) and TEA (4.3 mL) were added to a flask containing **SI-7** obtained above under nitrogen atmosphere. POCl<sub>3</sub> (0.7 mL) in 2 mL of THF was added slowly via syringe for a period of 1 h at 0 °C, and the mixture was stirred for another 2 h at 0°C. After then, the reaction mixture was diluted with 15 mL EA at 0°C and slowly quenched with saturated aqueous solution of Na<sub>2</sub>CO<sub>3</sub> with stirring for 30 min. The crude compound was purified by column chromatography (petroleum ether/ EA) to give corresponding isocyanides.

## 8. Characterization Data for Glycosyl Benzothiazoles:

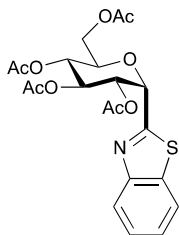

### (2*R*,3*R*,4*S*,5*R*,6*S*)-2-(acetoxymethyl)-6-(benzo[*d*]thiazol-2-yl)tetrahydro-2*H*-pyran-3,4,5-triyl triacetate (**17a**)

Following **General Procedure**, product **17a** was prepared from **12a** (0.20 mmol, 90 mg), **16** (0.40 mmol, 59.8 mg), **AIBN** (0.02 mmol, 3.2 mg, 10 mol%). Purification by flash chromatography (SiO<sub>2</sub>, petroleum ether: EtOAc = 1:0 to 10:1) afforded the title product as a colorless oil (86.5 mg, 0.186 mmol, 93%).

**<sup>1</sup>H NMR** (CDCl<sub>3</sub>, 400 MHz) δ: 8.84 (d, *J* = 5.0 Hz, 1H), 7.68 (s, 1H), 7.53 (d, *J* = 5.0 Hz, 1H), 5.78 (t, *J* = 6.4 Hz, 1H), 5.38 (t, *J* = 5.1 Hz, 1H), 5.33 (d, *J* = 4.7 Hz, 1H), 5.08 (t, *J* = 6.7 Hz, 1H), 4.49 – 4.35 (m, 2H), 4.18 – 4.05 (m, 1H), 2.11 (s, 3H), 2.09 (s, 6H), 1.85 (s, 3H). **<sup>13</sup>C NMR** (CDCl<sub>3</sub>, 101 MHz) δ: 170.7, 169.6, 169.5, 169.5, 158.4, 150.0, 124.9, 124.6, 121.3, 116.3, 73.0, 71.9, 69.6, 69.3, 67.8, 61.5, 20.8, 20.8, 20.8, 20.5. **IR** (thin film, cm<sup>-1</sup>): 2921, 1745, 1597, 1552, 1369, 1222, 1099, 1044, 911 and 602 cm<sup>-1</sup>. [ $\alpha$ ]<sub>D</sub><sup>22</sup> = +73.6 (c = 0.30, CHCl<sub>3</sub>). **HRMS** (ESI) *m/z*: [M+Na]<sup>+</sup> Calcd for C<sub>20</sub>H<sub>22</sub>N<sub>2</sub>NaO<sub>9</sub> 488.0986, found 488.0985.

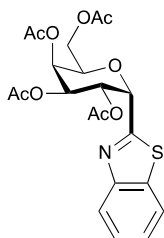

### (2*R*,3*S*,4*S*,5*R*,6*S*)-2-(acetoxymethyl)-6-(benzo[*d*]thiazol-2-yl)tetrahydro-2*H*-pyran-3,4,5-triyl triacetate (**17b**)

Following **General Procedure**, product **17b** was prepared from **12b** (0.20 mmol, 90 mg), **16** (0.40 mmol, 59.8 mg), **AIBN** (0.02 mmol, 3.2 mg, 10 mol%). Purification by flash chromatography (SiO<sub>2</sub>, petroleum ether: EtOAc = 1:0 to 10:1) afforded the title product as a colorless oil (88.3 mg, 0.192 mmol, 95%).

**<sup>1</sup>H NMR** (400 MHz, Chloroform-*d*) δ 8.11 (d, *J* = 8.4 Hz, 1H), 7.91 (d, *J* = 7.6 Hz, 1H), 7.52 (t, *J* = 8.0 Hz, 1H), 7.43 (t, *J* = 7.6 Hz, 1H), 5.94 (dd, *J* = 9.2, 1.6 Hz, 1H), 5.66 (d, *J* = 5.6 Hz, 1H), 5.63 – 5.54 (m, 2H), 4.73 (t, *J* = 5.6 Hz, 1H), 4.27 – 4.09 (m, 2H), 2.17 (s, 3H), 2.05 (s, 3H), 2.01 (s, 3H), 1.94 (s, 3H). **<sup>13</sup>C NMR** (101 MHz, Chloroform-*d*) δ 170.6, 170.2, 170.2, 169.9, 164.9, 153.2, 135.0, 126.5, 125.9, 124.1, 121.7, 71.7, 70.7, 68.2, 68.0, 67.8, 61.3, 20.9, 20.9, 20.8, 20.8. **IR** (thin film, cm<sup>-1</sup>): 2972, 1741, 1435, 1369, 1211, 1047, 919, 763 and 732.



$[\alpha]_D^{25} = +88.7$  ( $c = 0.39$ ,  $\text{CHCl}_3$ ). **HRMS (ESI)  $m/z$ :  $[\text{M}+\text{Na}]^+$  Calcd for  $\text{C}_{21}\text{H}_{23}\text{NO}_9\text{SNa}$  488.0986, found: 488.0985.**

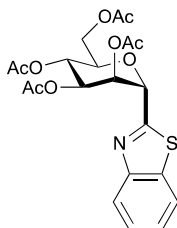

**(2R,3R,4S,5S,6S)-2-(acetoxymethyl)-6-(benzo[d]thiazol-2-yl)tetrahydro-2H-pyran-3,4,5-triyl triacetate (17c)**

Following **General Procedure**, product **17c** was prepared from **12c** (0.20 mmol, 90 mg), **16** (0.40 mmol, 59.8 mg), **AIBN** (0.02 mmol, 3.2 mg, 10 mol%). Purification by flash chromatography ( $\text{SiO}_2$ , petroleum ether: EtOAc = 1:0 to 10:1) afforded the title product as a colorless oil (89.3 mg, 0.19 mmol, 96%).

**$^1\text{H NMR}$**  (400 MHz, Chloroform- $d$ )  $\delta$  8.07 (d,  $J = 7.6$  Hz, 1H), 7.88 (d,  $J = 7.6$  Hz, 1H), 7.48 (t,  $J = 7.2$  Hz, 1H), 7.40 (t,  $J = 6.8$  Hz, 1H), 6.17 (s, 1H), 5.57 (d,  $J = 8.0$  Hz, 1H), 5.42 – 5.29 (m, 2H), 4.33 (dd,  $J = 11.6, 4.8$  Hz, 1H), 4.12 (d,  $J = 11.9$  Hz, 1H), 3.92 (br, 1H), 2.19 (s, 3H), 2.11 (s, 3H), 2.02 (s, 3H), 1.97 (s, 3H).  **$^{13}\text{C NMR}$**  (101 MHz, Chloroform- $d$ )  $\delta$  170.6, 170.1, 169.8, 169.7, 166.0, 152.9, 135.6, 126.4, 126.0, 124.1, 121.8, 76.2, 72.5, 69.7, 69.1, 66.6, 62.4, 21.0, 20.8, 20.7, 20.7. **IR** (thin film,  $\text{cm}^{-1}$ ): 2989, 1741, 1435, 1369, 1211, 1048, 919 and 764  $\text{cm}^{-1}$ .  $[\alpha]_D^{25} = +75.1$  ( $c = 0.36$ ,  $\text{CHCl}_3$ ). **HRMS (ESI)  $m/z$ :  $[\text{M}+\text{Na}]^+$  Calcd for  $\text{C}_{21}\text{H}_{23}\text{NO}_9\text{SNa}^+$  488.0986, found: 488.0985.** The  $^1\text{H NMR}$  spectra coincide with the previously reported data<sup>[6]</sup>.

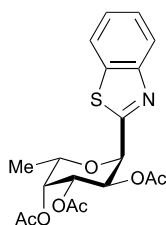

**(2S,3S,4R,5R,6S)-2-(benzo[d]thiazol-2-yl)-6-methyltetrahydro-2H-pyran-3,4,5-triyl triacetate (17d)**

Following **General Procedure**, product **17d** was prepared from **12d** (0.20 mmol, 78.5 mg), **16** (0.40 mmol, 59.8 mg), **AIBN** (0.02 mmol, 3.2 mg, 10 mol%). Purification by flash chromatography ( $\text{SiO}_2$ , petroleum ether: EtOAc = 1:0 to 11:1) afforded the title product as a colorless oil (65.1 mg, 0.16 mmol, 80%).

**$^1\text{H NMR}$**  (400 MHz, Chloroform- $d$ )  $\delta$  8.10 (d,  $J = 8.4$  Hz, 1H), 7.90 (d,  $J = 8.0$  Hz, 1H), 7.51 (t,  $J = 8.4$  Hz, 1H), 7.43 (t,  $J = 8.0$  Hz, 1H), 5.97 (dd,  $J = 9.6, 3.6$  Hz, 1H), 5.64 – 5.50 (m, 2H), 5.44 (dd,  $J = 3.2, 2.0$  Hz, 1H), 4.64 – 4.57 (m, 1H), 2.19 (s, 3H), 2.03 (s, 3H), 1.94 (s, 3H), 1.19 (d,  $J = 6.4$  Hz, 3H).  **$^{13}\text{C NMR}$**  (101 MHz, Chloroform- $d$ )  $\delta$  170.7, 170.4, 170.1, 165.3, 153.3, 135.1, 126.4, 125.8, 124.1, 121.7, 71.9, 70.8, 68.7, 68.2, 20.9, 20.8, 16.1. **IR** (thin film,  $\text{cm}^{-1}$ ): 3005, 2989, 1744, 1435, 1370, 1275, 1260, 1219, 1054, 911, 764 and 750.  $[\alpha]_D^{25} = -90.8$  ( $c = 0.30$ ,  $\text{CHCl}_3$ ). **HRMS (ESI)  $m/z$ :  $[\text{M}+\text{Na}]^+$  Calcd for  $\text{C}_{19}\text{H}_{21}\text{NO}_7\text{SNa}$  430.0931, found: 430.0928.**

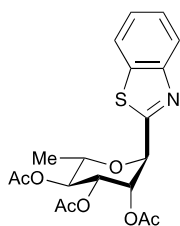

**(2*S*,3*R*,4*R*,5*S*,6*S*)-2-(benzo[*d*]thiazol-2-yl)-6-methyltetrahydro-2*H*-pyran-3,4,5-triyl triacetate (17e)**

Following **General Procedure**, product **17e** was prepared from **12e** (0.20 mmol, 90 mg), **16** (0.40 mmol, 59.8 mg), **AIBN** (0.02 mmol, 3.2 mg, 10 mol%). Purification by flash chromatography (SiO<sub>2</sub>, petroleum ether: EtOAc = 1:0 to 10:1) afforded the title product as a colorless oil (78.9 mg, 0.19 mmol, 97%).

**<sup>1</sup>H NMR** (400 MHz, Chloroform-*d*) δ 8.08 (d, *J* = 8.4 Hz, 1H), 7.89 (d, *J* = 8.0 Hz, 1H), 7.49 (t, *J* = 7.6 Hz, 1H), 7.41 (t, *J* = 7.6 Hz, 1H), 6.18 (s, 1H), 5.52 (dd, *J* = 9.6, 2.4 Hz, 1H), 5.31 (s, 1H), 5.17 (t, *J* = 9.6 Hz, 1H), 3.85 – 3.74 (m, 1H), 2.21 (s, 3H), 2.03 (s, 3H), 1.99 (s, 3H), 1.28 (d, *J* = 6.0 Hz, 3H). **<sup>13</sup>C NMR** (101 MHz, Chloroform-*d*) δ 170.3, 170.0, 169.9, 167.1, 153.0, 135.6, 126.4, 125.9, 124.1, 121.8, 76.1, 71.4, 70.7, 70.1, 69.3, 21.1, 20.8, 17.6. **IR** (thin film, cm<sup>-1</sup>): 3005, 2989, 1742, 1434, 1369, 1275, 1260, 1216, 1053, 911, 764 and 750.  $[\alpha]_D^{25} = -87.5$  (*c* = 0.49, CHCl<sub>3</sub>). **HRMS (ESI) *m/z*: [M+Na]<sup>+</sup> Calcd for C<sub>19</sub>H<sub>21</sub>NO<sub>7</sub>SNa 430.0931, found: 430.0930.**

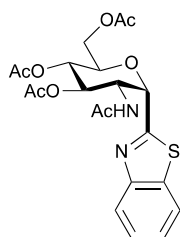

**(2*R*,3*S*,4*R*,5*S*,6*S*)-5-acetamido-2-(acetoxymethyl)-6-(benzo[*d*]thiazol-2-yl)tetrahydro-2*H*-pyran-3,4-diyl diacetate (17f)**

Following **General Procedure**, product **17f** was prepared from **12f** (0.20 mmol, 89 mg), **16** (0.40 mmol, 59.8 mg), **AIBN** (0.02 mmol, 3.2 mg, 10 mol%). Purification by flash chromatography (SiO<sub>2</sub>, petroleum ether: EtOAc = 1:0 to 1:3) afforded the title product as a colorless oil (91 mg, 0.196 mmol, 98%).

**<sup>1</sup>H NMR** (400 MHz, Chloroform-*d*) δ 8.09 (d, *J* = 8.4 Hz, 1H), 7.91 (d, *J* = 8.0 Hz, 1H), 7.52 (t, *J* = 7.6 Hz, 1H), 7.44 (t, *J* = 7.6 Hz, 1H), 7.11 (d, *J* = 9.6 Hz, 1H), 5.72 (t, *J* = 9.6 Hz, 1H), 5.42 (d, *J* = 6.0 Hz, 1H), 5.17 (t, *J* = 9.6 Hz, 1H), 4.91 – 4.81 (m, 1H), 4.19 (dd, *J* = 12.0, 4.4 Hz, 1H), 4.04 (t, *J* = 12.0, 1.6 Hz, 1H), 3.74 – 3.67 (m, 1H), 2.08 (s, 3H), 2.04 (s, 3H), 1.95 (s, 3H), 1.93 (s, 3H). **<sup>13</sup>C NMR** (101 MHz, Chloroform-*d*) δ 171.2, 170.6, 170.1, 169.3, 168.4, 152.2, 135.2, 126.6, 126.3, 123.9, 121.9, 73.9, 71.6, 71.4, 68.7, 62.0, 50.9, 23.4, 20.8, 20.7, 20.6. **IR** (thin film, cm<sup>-1</sup>): 3006, 2989, 1740, 1677, 1510, 1433, 1366, 1275, 1260, 1220, 1037, 912, 764 and 750.  $[\alpha]_D^{25} = +92.6$  (*c* = 0.57, CHCl<sub>3</sub>). **HRMS (ESI) *m/z*: [M+Na]<sup>+</sup> Calcd for C<sub>21</sub>H<sub>24</sub>N<sub>2</sub>O<sub>8</sub>SNa 487.1146, found: 487.1143.**

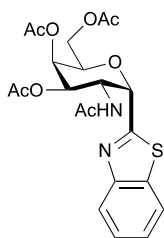

**(2R,3R,4R,5R,6S)-5-acetamido-2-(acetoxymethyl)-6-(benzo[d]thiazol-2-yl)tetrahydro-2H-pyran-3,4-diyl diacetate (17g)**

Following **General Procedure**, product **17g** was prepared from **12g** (0.20 mmol, 89 mg), **16** (0.40 mmol, 59.8 mg), **AIBN** (0.02 mmol, 3.2 mg, 10 mol%). Purification by flash chromatography (SiO<sub>2</sub>, petroleum ether: EtOAc = 1:0 to 10:1) afforded the title product as a colorless oil (87.2 mg, 0.188 mmol, 94%).

**<sup>1</sup>H NMR** (400 MHz, Chloroform-*d*) δ 8.05 (d, *J* = 8.4 Hz, 1H), 7.92 (d, *J* = 8.0 Hz, 1H), 7.53 (t, *J* = 7.6 Hz, 1H), 7.45 (t, *J* = 7.6 Hz, 1H), 7.13 (d, *J* = 9.6 Hz, 1H), 5.62 (dd, *J* = 11.2, 2.8 Hz, 1H), 5.47 (d, *J* = 6.0 Hz, 1H), 5.38 (d, *J* = 2.0 Hz, 1H), 5.18 – 5.09 (m, 1H), 4.10 (d, *J* = 6.4 Hz, 2H), 3.93 (t, *J* = 6.4 Hz, 1H), 2.19 (s, 3H), 2.03 (s, 3H), 2.01 (s, 3H), 1.97 (s, 3H). **<sup>13</sup>C NMR** (101 MHz, Chloroform-*d*) δ 170.9, 170.5, 170.4, 170.3, 169.2, 152.2, 135.2, 126.6, 126.3, 123.8, 122.0, 74.4, 70.5, 68.8, 67.4, 61.9, 46.9, 23.6, 20.9, 20.9, 20.7. **IR** (thin film, cm<sup>-1</sup>): 3006, 2989, 1744, 1670, 1513, 1434, 1370, 1275, 1260, 1228, 1084, 1056, 917, 764 and 750.  $[\alpha]_D^{25} = +96.7$  (c = 0.16, CHCl<sub>3</sub>). **HRMS (ESI) m/z: [M+Na]<sup>+</sup> Calcd for C<sub>21</sub>H<sub>24</sub>N<sub>2</sub>O<sub>8</sub>SNa** 487.1146, found: 487.1144.

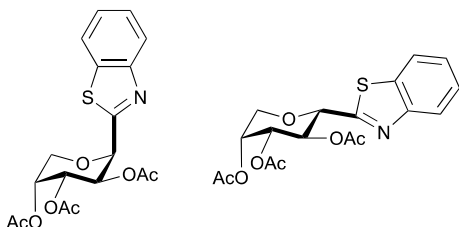

**(3S,4R,5R)-2-(benzo[d]thiazol-2-yl)tetrahydro-2H-pyran-3,4,5-triyl triacetate (17h)**

Following **General Procedure**, product **17h** was prepared from **12h** (0.20 mmol, 75.6 mg), **16** (0.40 mmol, 59.8 mg), **AIBN** (0.02 mmol, 3.2 mg, 10 mol%). Purification by flash chromatography (SiO<sub>2</sub>, petroleum ether: EtOAc = 1:0 to 10:1) afforded the title product as a colorless oil (72.3 mg, 0.184 mmol, 92%, **α**: **β** = 2.4: 1).

**<sup>1</sup>H NMR** (400 MHz, Chloroform-*d*) (**β isomer**) δ: 7.98 (d, *J* = 8.0 Hz, 1H), 7.90 (d, *J* = 8.0 Hz, 1H), 7.47 (dt, *J* = 7.2, 1.2 Hz, 1H), 7.39 (dt, *J* = 7.2, 1.2 Hz, 1H), 5.53 (t, *J* = 9.6 Hz, 1H), 5.44 (brs, 1H), 5.24 (dd, *J* = 10.0, 3.2 Hz, 1H), 4.81 (d, *J* = 9.2 Hz, 1H), 4.24 (dd, *J* = 13.2, 2.0 Hz, 1H), 3.91 (dd, *J* = 13.2, 1.2 Hz, 1H), 2.20 (s, 3H), 2.01 (s, 3H), 2.00 (s, 3H). (**α isomer**) δ: 7.99 (d, *J* = 8.0 Hz, 1H), 7.90 (d, *J* = 8.0 Hz, 1H), 7.47 (t, *J* = 7.2 Hz, 1H), 7.39 (t, *J* = 7.2 Hz, 1H), 5.56-5.47 (m, 2H), 5.40-5.31 (m, 2H), 4.13 (dd, *J* = 13.2, 2.0 Hz, 1H), 3.90 (t, *J* = 10.8 Hz, 1H), 2.19 (s, 3H), 2.04 (s, 3H), 1.92 (s, 3H). **<sup>13</sup>C NMR** (101 MHz, Chloroform-*d*) (**β isomer**) δ: 170.5, 170.3, 169.7, 167.3, 152.8, 135.0, 126.3, 125.6, 123.4, 122.0, 78.6, 71.3, 69.1, 68.5, 68.5, 21.1, 20.8, 20.8. (**α isomer**) δ: 169.8, 169.2, 169.0, 167.5, 152.8, 134.9, 126.3, 125.4, 123.4, 121.8, 75.0.

70.0, 66.4, 65.1, 64.3, 20.9, 20.8, 20.7. **IR** (thin film,  $\text{cm}^{-1}$ ): 3006, 2989, 1743, 1437, 1370, 1275, 1260, 1214, 1045, 931, 764 and 750.  $[\alpha]_D^{25} = -62.1$  ( $c = 0.34$ ,  $\text{CHCl}_3$ ). **HRMS (ESI) m/z:**  $[\text{M}+\text{Na}]^+$  Calcd for  $\text{C}_{18}\text{H}_{19}\text{NO}_7\text{SNa}$  416.0774, found: 416.0772. **Structural Assignment:** The anomeric signal of  $\beta$  isomer is  $\delta$  4.81 (d,  $J = 9.2$  Hz, 1H), supporting the assigned  $\beta$ -configuration.

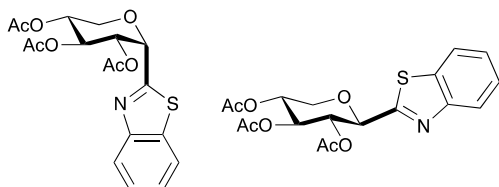

**(3R,4S,5R)-2-(benzo[*d*]thiazol-2-yl)tetrahydro-2H-pyran-3,4,5-triyl triacetate (17i)**

Following **General Procedure**, product **17i** was prepared from **12i** (0.20 mmol, 75.6 mg), **16** (0.40 mmol, 59.8 mg), **AIBN** (0.02 mmol, 3.2 mg, 10 mol%). Purification by flash chromatography ( $\text{SiO}_2$ , petroleum ether: EtOAc = 1:0 to 10:1) afforded the title product as a colorless oil (75.4 mg, 0.192 mmol, 96%,  $\alpha$ :  $\beta$  = 2: 1).

**$^1\text{H}$  NMR** (400 MHz, Chloroform-*d*)  $\delta$  ( $\beta$  isomer)  $\delta$ : 7.98 (d,  $J = 8.4$  Hz, 1H), 7.90 (d,  $J = 8.0$  Hz, 1H), 7.48 (t,  $J = 6.8$  Hz, 1H), 7.40 (t,  $J = 8.0$  Hz, 1H), 5.41 (t,  $J = 9.6$  Hz, 1H), 5.26 (t,  $J = 9.6$  Hz, 1H), 5.16 (dt,  $J = 10.0, 5.6$  Hz, 1H), 4.83 (d,  $J = 9.6$  Hz, 1H), 4.35 (dd,  $J = 11.6, 6.0$  Hz, 1H), 3.56 (t,  $J = 10.8$  Hz, 1H), 2.07 (s, 3H), 2.04 (s, 3H), 1.98 (s, 3H). ( $\alpha$  isomer)  $\delta$ : 8.00 (d,  $J = 8.0$  Hz, 1H), 7.90 (d,  $J = 8.0$  Hz, 1H), 7.47 (t,  $J = 7.2$  Hz, 1H), 7.39 (t,  $J = 7.6$  Hz, 1H), 5.33 (s, 1H), 5.28 (s, 2H), 4.81 (s, 1H), 4.25 (d,  $J = 13.2$  Hz, 1H), 4.09 (d,  $J = 13.2$  Hz, 1H), 2.16 (s, 3H), 2.12 (s, 3H), 1.92 (s, 3H).  **$^{13}\text{C}$  NMR** (101 MHz, Chloroform-*d*)  $\delta$  ( $\beta$  isomer)  $\delta$ : 170.4, 170.0, 169.5, 166.9, 152.8, 135.0, 126.4, 125.7, 123.5, 122.1, 78.3, 73.1, 71.7, 69.1, 67.3, 29.8, 20.9, 20.7. ( $\alpha$  isomer)  $\delta$ : 169.9, 169.5, 168.5, 167.9, 152.8, 134.9, 126.2, 125.3, 123.4, 121.8, 75.2, 68.2, 66.9, 66.5, 65.9, 21.1, 20.9, 20.7. **IR** (thin film,  $\text{cm}^{-1}$ ): 3006, 2989, 1744, 1437, 1371, 1275, 1260, 1216, 1046, 931, 764 and 750.  $[\alpha]_D^{25} = -55.3$  ( $c = 0.37$ ,  $\text{CHCl}_3$ ). **HRMS (ESI) m/z:**  $[\text{M}+\text{Na}]^+$  Calcd for  $\text{C}_{18}\text{H}_{19}\text{NO}_7\text{SNa}$  416.0774, found: 416.0773. The  $^1\text{H}$  NMR spectra coincide with the previously reported data<sup>[7]</sup>.

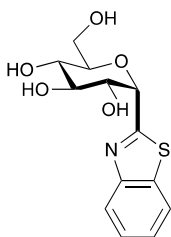

**(2S,3R,4S,5S,6R)-2-(benzo[*d*]thiazol-2-yl)-6-(hydroxymethyl)tetrahydro-2H-pyran-3,4,5-triol (17k)**

Following **General Procedure**, product **17k** was prepared from **12k** (0.20 mmol, 56 mg), **16** (0.40 mmol, 59.8 mg), **AIBN** (0.02 mmol, 3.2 mg, 10 mol%). Purification by flash chromatography ( $\text{SiO}_2$ , DCM: MeOH = 1:0 to 10:1) afforded the title product as a white solid. (53.5 mg, 0.18 mmol, 90%).

**Mp:** 128 °C. **<sup>1</sup>H NMR** (400 MHz, Chloroform-*d*) δ 8.02 (d, *J* = 8.4 Hz, 2H), 7.54 (t, *J* = 8.0 Hz, 1H), 7.46 (t, *J* = 7.6 Hz, 1H), 5.44 (d, *J* = 4.4 Hz, 1H), 4.00 – 3.93 (m, 2H), 3.88 – 3.70 (m, 3H), 3.52 – 3.45 (m, 1H). **<sup>13</sup>C NMR** (101 MHz, Chloroform-*d*) δ 171.7, 153.5, 136.3, 127.3, 126.7, 123.8, 122.9, 78.2, 76.0, 75.0, 73.7, 71.6, 62.6. **IR** (thin film, cm<sup>-1</sup>): 3309, 2988, 1450, 1276, 1261, 1021, 764 and 750.  $[\alpha]_D^{25} = +71.1$  (c = 0.63, CHCl<sub>3</sub>). **HRMS (ESI) m/z:** [M+Na]<sup>+</sup> Calcd for C<sub>13</sub>H<sub>15</sub>NO<sub>5</sub>SNa 320.0563, found: 320.0565.

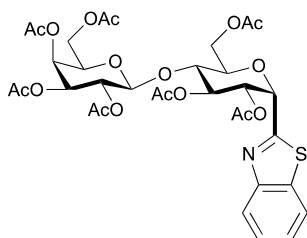

**(2R,3S,4S,5R,6R)-2-(acetoxymethyl)-6-(((2R,3R,4S,5R,6S)-4,5-diacetoxy-2-(acetoxymethyl)-6-(benzo[*d*]thiazol-2-yl)tetrahydro-2H-pyran-3-yl)oxy)tetrahydro-2H-pyran-3,4,5-triyl triacetate (17j)**

Following **General Procedure**, product **17j** was prepared from **12j** (0.20 mmol, 147.6 mg), **16** (0.40 mmol, 59.8 mg), **AIBN** (0.02 mmol, 3.2 mg, 10 mol%). Purification by flash chromatography (SiO<sub>2</sub>, petroleum ether: EtOAc = 1:0 to 1:1) afforded the title product as a colorless oil (105.4 mg, 0.14 mmol, 70%).

**<sup>1</sup>H NMR** (400 MHz, Chloroform-*d*) δ 8.09 (d, *J* = 8.4 Hz, 1H), 7.90 (d, *J* = 8.0 Hz, 1H), 7.51 (t, *J* = 7.6 Hz, 1H), 7.42 (t, *J* = 7.6 Hz, 1H), 5.88 (t, *J* = 6.4 Hz, 1H), 5.53 (d, *J* = 4.8 Hz, 1H), 5.40 – 5.32 (m, 2H), 5.15 (dd, *J* = 10.0, 8.0 Hz, 1H), 4.99 (dd, *J* = 10.4, 3.2 Hz, 1H), 4.63 (d, *J* = 8.0 Hz, 1H), 4.42 – 4.33 (m, 2H), 4.26 (dd, *J* = 12.4, 6.4 Hz, 1H), 4.09 (d, *J* = 6.4 Hz, 2H), 3.93 (t, *J* = 6.4 Hz, 1H), 3.82 (t, *J* = 6.4 Hz, 1H), 2.13 (s, 3H), 2.12 (s, 3H), 2.11 (s, 3H), 2.05 (s, 3H), 2.00 (s, 3H), 1.96 (s, 3H), 1.93 (s, 3H). **<sup>13</sup>C NMR** (101 MHz, Chloroform-*d*) δ 170.6, 170.5, 170.2, 170.2, 170.0, 169.3, 169.3, 166.2, 153.2, 135.0, 126.4, 125.7, 124.0, 121.7, 101.3, 76.3, 72.7, 71.6, 71.2, 71.0, 69.7, 69.1, 69.0, 66.9, 62.1, 61.1, 21.0, 21.0, 20.8, 20.7, 20.7, 20.6. **IR** (thin film, cm<sup>-1</sup>): 2988, 1742, 1434, 1369, 1259, 1213, 1050, 917 and 750.  $[\alpha]_D^{25} = +56.3$  (c = 0.61, CHCl<sub>3</sub>). **HRMS (ESI) m/z:** [M+Na]<sup>+</sup> Calcd for C<sub>33</sub>H<sub>39</sub>NO<sub>17</sub>SNa 776.1831, found: 776.1830.

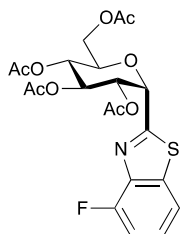

**(2R,3R,4S,5R,6S)-2-(acetoxymethyl)-6-(4-fluorobenzo[*d*]thiazol-2-yl)tetrahydro-2H-pyran-3,4,5-triyl triacetate (18m)**

Following **General Procedure**, product **18m** was prepared from **12a** (0.20 mmol, 90 mg), **14a** (0.40 mmol, 67 mg), **AIBN** (0.02 mmol, 3.2 mg, 10 mol%). Purification by flash

chromatography (SiO<sub>2</sub>, petroleum ether: EtOAc = 1:0 to 10:1) afforded the title product as a colorless oil (87.9 mg, 0.182 mmol, 91%).

**<sup>1</sup>H NMR** (400 MHz, Chloroform-*d*) δ 7.72 (d, *J* = 7.6 Hz, 1H), 7.48 – 7.40 (m, 1H), 7.27 (dd, *J* = 18.0, 10.0 Hz, 1H), 5.86 (t, *J* = 8.0 Hz, 1H), 5.68 (d, *J* = 5.2 Hz, 1H), 5.43 (dd, *J* = 8.0, 6.0 Hz, 1H), 5.18 (t, *J* = 8.4 Hz, 1H), 4.61 – 4.52 (m, 1H), 4.41 (dd, *J* = 12.4, 5.2 Hz, 1H), 4.19 (d, *J* = 11.6 Hz, 1H), 2.14 (s, 3H), 2.11 (s, 6H), 2.02 (s, 3H). **<sup>13</sup>C NMR** (101 MHz, Chloroform-*d*) δ 170.8, 169.9, 169.8, 169.7, 165.8, 156.21 (d, *J* = 258.2 Hz), 142.1 (d, *J* = 13.9 Hz), 137.7 (d, *J* = 3.4 Hz), 126.8 (d, *J* = 7.0 Hz), 117.4 (d, *J* = 4.4 Hz), 112.2 (d, *J* = 18.0 Hz), 72.0, 71.6, 70.0, 69.9, 68.2, 61.7, 20.8, 20.8, 20.8. **<sup>19</sup>F NMR** (376 MHz, Chloroform-*d*) δ -120.5. **IR** (thin film, cm<sup>-1</sup>): 3006, 2989, 1747, 1476, 1369, 1275, 1261, 1222, 1038, 918, 764 and 750. **[α]<sub>D</sub><sup>20</sup>** = +69.9 (c = 0.30, CHCl<sub>3</sub>). **HRMS (ESI) m/z: [M+Na]<sup>+</sup>** Calcd for C<sub>21</sub>H<sub>22</sub>FNO<sub>9</sub>SNa 506.0892, found: 506.0897.

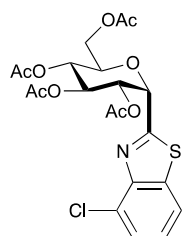

**(2R,3R,4S,5R,6S)-2-(acetoxymethyl)-6-(4-chlorobenzo[*d*]thiazol-2-yl)tetrahydro-2H-pyran-3,4,5-triyl triacetate (18n)**

Following **General Procedure**, product **18n** was prepared from **12a** (0.20 mmol, 90 mg), **14b** (0.40 mmol, 73.2 mg), **AIBN** (0.02 mmol, 3.2 mg, 10 mol%). Purification by flash chromatography (SiO<sub>2</sub>, petroleum ether: EtOAc = 1:0 to 10:1) afforded the title product as a colorless oil (92.8 mg, 0.186 mmol, 93%).

**<sup>1</sup>H NMR** (400 MHz, Chloroform-*d*) δ 7.80 (d, *J* = 7.6 Hz, 1H), 7.54 (d, *J* = 7.6 Hz, 1H), 7.36 (t, *J* = 8.0 Hz, 1H), 5.85 (t, *J* = 8.0 Hz, 1H), 5.64 (d, *J* = 5.2 Hz, 1H), 5.39 (dd, *J* = 7.6, 6.0 Hz, 1H), 5.14 (t, *J* = 8.0 Hz, 1H), 4.58 – 4.47 (m, 1H), 4.36 (dd, *J* = 12.0, 4.8 Hz, 1H), 4.15 (d, *J* = 12.4 Hz, 1H), 2.10 (s, 3H), 2.07 (s, 3H), 2.06 (s, 3H), 1.98 (s, 3H). **<sup>13</sup>C NMR** (101 MHz, Chloroform-*d*) δ 170.8, 169.9, 169.8, 169.7, 166.1, 150.2, 136.5, 129.0, 126.8, 126.4, 120.2, 72.0, 71.6, 69.9, 69.8, 68.2, 61.8, 20.9, 20.8, 20.8. **IR** (thin film, cm<sup>-1</sup>): 3006, 2990, 1743, 1457, 1368, 1275, 1260, 1217, 1037, 914, 764 and 750. **[α]<sub>D</sub><sup>20</sup>** = +71.1 (c = 0.52, CHCl<sub>3</sub>). **HRMS (ESI) m/z: [M+Na]<sup>+</sup>** Calcd for C<sub>21</sub>H<sub>22</sub>ClNO<sub>9</sub>SNa 522.0596, found: 522.0597.

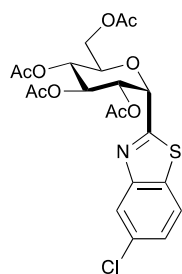

**(2R,3R,4S,5R,6S)-2-(acetoxymethyl)-6-(5-chlorobenzo[*d*]thiazol-2-yl)tetrahydro-2H-**

**pyran-3,4,5-triyl triacetate (18o)**

Following **General Procedure**, product **18o** was prepared from **12a** (0.20 mmol, 90 mg), **14c** (0.40 mmol, 73.2 mg), **AIBN** (0.02 mmol, 3.2 mg, 10 mol%). Purification by flash chromatography (SiO<sub>2</sub>, petroleum ether: EtOAc = 1:0 to 10:1) afforded the title product as a colorless oil (89.8 mg, 0.18 mmol, 90%).

<sup>1</sup>H NMR (400 MHz, Chloroform-*d*) δ 8.15 (s, 1H), 7.82 (d, *J* = 8.0 Hz, 1H), 7.41 (d, *J* = 8.0 Hz, 1H), 5.96 (t, *J* = 8.0 Hz, 1H), 5.58 (d, *J* = 5.2 Hz, 1H), 5.36 (t, *J* = 6.4 Hz, 1H), 5.15 (t, *J* = 8.4 Hz, 1H), 4.47 – 4.40 (m, 1H), 4.32 (dd, *J* = 12.0, 3.2 Hz, 1H), 4.08 (d, *J* = 12 Hz, 1H), 2.07 (s, 3H), 2.05 (s, 6H), 1.93 (s, 3H). <sup>13</sup>C NMR (101 MHz, Chloroform-*d*) δ 170.7, 169.9, 169.9, 169.7, 166.7, 154.0, 133.3, 132.7, 126.5, 124.0, 122.4, 71.6, 71.6, 70.1, 70.1, 68.4, 61.8, 20.8, 20.8, 20.7. IR (thin film, cm<sup>-1</sup>): 3006, 2989, 1741, 1437, 1367, 1275, 1260, 1211, 1033, 921, 764 and 750. [α]<sub>D</sub><sup>20</sup> = +97.3 (c = 0.64, CHCl<sub>3</sub>). HRMS (ESI) *m/z*: [M+Na]<sup>+</sup> Calcd for C<sub>21</sub>H<sub>22</sub>ClNO<sub>9</sub>SNa 522.0596, found: 522.0598.

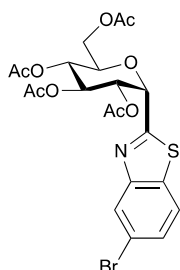

**(2R,3R,4S,5R,6S)-2-(acetoxymethyl)-6-(5-bromobenzo[*d*]thiazol-2-yl)tetrahydro-2H-pyran-3,4,5-triyl triacetate (18p)**

Following **General Procedure**, product **18p** was prepared from **12a** (0.20 mmol, 90 mg), **14d** (0.40 mmol, 91 mg), **AIBN** (0.02 mmol, 3.2 mg, 10 mol%). Purification by flash chromatography (SiO<sub>2</sub>, petroleum ether: EtOAc = 1:0 to 10:1) afforded the title product as a colorless oil (97.7 mg, 0.18 mmol, 90%).

<sup>1</sup>H NMR (400 MHz, Chloroform-*d*) δ 8.31 (s, 1H), 7.76 (d, *J* = 8.4 Hz, 1H), 7.54 (d, *J* = 8.8 Hz, 1H), 5.96 (t, *J* = 8.8 Hz, 1H), 5.58 (d, *J* = 6.0 Hz, 1H), 5.36 (dd, *J* = 9.2, 6.0 Hz, 1H), 5.15 (m, *J* = 8.8 Hz, 1H), 4.47 – 4.40 (m, 1H), 4.31 (dd, *J* = 12.4, 4.4 Hz, 1H), 4.07 (dd, *J* = 12.4, 1.6 Hz, 1H), 2.07 (s, 3H), 2.05 (s, 6H), 1.93 (s, 3H). <sup>13</sup>C NMR (101 MHz, Chloroform-*d*) δ 170.7, 169.9, 169.9, 169.7, 166.4, 154.3, 133.8, 129.1, 127.1, 122.8, 120.2, 71.6, 70.1, 70.0, 68.4, 61.8, 20.8, 20.8, 20.7. IR (thin film, cm<sup>-1</sup>): 3006, 2989, 1741, 1457, 1367, 1275, 1260, 1212, 1034, 913, 764 and 750. [α]<sub>D</sub><sup>20</sup> = +67.4 (c = 0.41, CHCl<sub>3</sub>). HRMS (ESI) *m/z*: [M+Na]<sup>+</sup> Calcd for C<sub>21</sub>H<sub>22</sub>BrNO<sub>9</sub>SNa 566.0091, found: 566.0090.

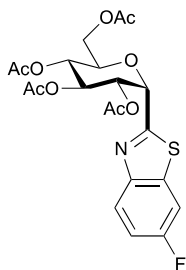

**(2R,3R,4S,5R,6S)-2-(acetoxymethyl)-6-(6-fluorobenzo[d]thiazol-2-yl)tetrahydro-2H-pyran-3,4,5-triyl triacetate (18q)**

Following **General Procedure**, product **18q** was prepared from **12a** (0.20 mmol, 90 mg), **14e** (0.40 mmol, 67 mg), **AIBN** (0.02 mmol, 3.2 mg, 10 mol%). Purification by flash chromatography (SiO<sub>2</sub>, petroleum ether: EtOAc = 1:0 to 10:1) afforded the title product as a colorless oil (82.1 mg, 0.17 mmol, 85%).

**<sup>1</sup>H NMR** (400 MHz, Chloroform-*d*) δ 8.11 (dd, *J* = 8.8, 4.8 Hz, 1H), 7.59 (dd, *J* = 8.0, 2.0 Hz, 1H), 7.32 – 7.24 (m, 1H), 5.99 (t, *J* = 8.8 Hz, 1H), 5.59 (d, *J* = 5.6 Hz, 1H), 5.38 (dd, *J* = 9.2, 6.0 Hz, 1H), 5.17 (t, *J* = 8.8 Hz, 1H), 4.47 – 4.41 (m, 1H), 4.34 (dd, *J* = 12.4, 4.4 Hz, 1H), 4.08 (dd, *J* = 12.4, 1.6 Hz, 1H), 2.10 (s, 3H), 2.07 (s, 6H), 1.96 (s, 3H). **<sup>13</sup>C NMR** (101 MHz, Chloroform-*d*) δ 170.8, 170.0, 169.8, 164.3 (d, *J* = 3.2 Hz), 161.0 (d, *J* = 247.1 Hz), 149.9 (d, *J* = 1.3 Hz), 136.2 (d, *J* = 11.3 Hz), 125.3 (d, *J* = 9.5 Hz), 115.5 (d, *J* = 25.0 Hz), 107.9 (d, *J* = 26.8 Hz), 71.7, 71.5, 70.3, 70.1, 68.5, 61.8, 20.9, 20.9, 20.8, 20.8. **<sup>19</sup>F NMR** (376 MHz, Chloroform-*d*) δ -114.7. **IR** (thin film, cm<sup>-1</sup>): 3006, 2989, 1742, 1456, 1367, 1275, 1260, 1212, 1033, 912, 764 and 750. **[α]<sub>D</sub><sup>20</sup>** = +74.3 (c = 0.41, CHCl<sub>3</sub>). **HRMS (ESI) m/z: [M+Na]<sup>+</sup>** Calcd for C<sub>21</sub>H<sub>22</sub>FNO<sub>9</sub>SNa 506.0892, found: 506.0892.

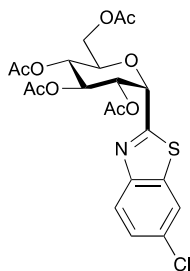

**(2R,3R,4S,5R,6S)-2-(acetoxymethyl)-6-(6-chlorobenzo[d]thiazol-2-yl)tetrahydro-2H-pyran-3,4,5-triyl triacetate (18r)**

Following **General Procedure**, product **18r** was prepared from **12a** (0.20 mmol, 90 mg), **14f** (0.40 mmol, 73.2 mg), **AIBN** (0.02 mmol, 3.2 mg, 10 mol%). Purification by flash chromatography (SiO<sub>2</sub>, petroleum ether: EtOAc = 1:0 to 10:1) afforded the title product as a colorless oil (72.8 mg, 0.146 mmol, 73%).

**<sup>1</sup>H NMR** (400 MHz, Chloroform-*d*) δ 8.06 (d, *J* = 8.8 Hz, 1H), 7.89 (d, *J* = 1.6 Hz, 1H), 7.50 (dd, *J* = 8.8, 2.0 Hz, 1H), 5.95 (t, *J* = 8.8 Hz, 1H), 5.59 (d, *J* = 5.6 Hz, 1H), 5.37 (dd, *J* = 9.2, 6.0 Hz, 1H), 5.16 (t, *J* = 8.8 Hz, 1H), 4.47 – 4.40 (m, 1H), 4.33 (dd, *J* = 12.4, 4.8 Hz, 1H), 4.09 (dd, *J* = 12.4, 2.4 Hz, 1H), 2.09 (s, 3H), 2.06 (s, 6H), 1.95 (s, 3H). **<sup>13</sup>C NMR** (101 MHz, Chloroform-*d*) δ 170.8, 170.0, 170.0, 169.8, 151.8, 136.3, 132.1, 127.4, 125.0, 121.4, 71.6, 70.2, 70.1, 68.5, 61.8, 20.9, 20.8, 20.8. **IR** (thin film,



cm<sup>-1</sup>): 3006, 2989, 1742, 1436, 1367, 1275, 1260, 1213, 1035, 914, 764 and 750.  $[\alpha]_D^{25}$  = +71.3 (c = 0.49, CHCl<sub>3</sub>). **HRMS (ESI) m/z:** [M+Na]<sup>+</sup> **Calcd for** C<sub>21</sub>H<sub>22</sub>ClNO<sub>9</sub>SNa 522.0596, found: 522.0598.

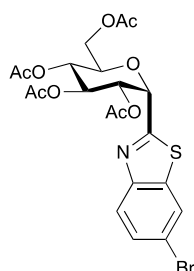

**(2R,3R,4S,5R,6S)-2-(acetoxymethyl)-6-(6-bromobenzo[d]thiazol-2-yl)tetrahydro-2H-pyran-3,4,5-triyl triacetate (18s)**

Following **General Procedure**, product **18s** was prepared from **12a** (0.20 mmol, 90 mg), **14g** (0.40 mmol, 91 mg), **AIBN** (0.02 mmol, 3.2 mg, 10 mol%). Purification by flash chromatography (SiO<sub>2</sub>, petroleum ether: EtOAc = 1:0 to 10:1) afforded the title product as a colorless oil (102.1 mg, 0.188 mmol, 94%).

**<sup>1</sup>H NMR** (400 MHz, Chloroform-*d*)  $\delta$  8.05 (s, 1H), 8.00 (d, *J* = 8.8 Hz, 1H), 7.63 (d, *J* = 8.8 Hz, 1H), 5.94 (t, *J* = 8.8 Hz, 1H), 5.58 (d, *J* = 6.0 Hz, 1H), 5.37 (dd, *J* = 8.4, 6.0 Hz, 1H), 5.15 (t, *J* = 8.4 Hz, 1H), 4.46 – 4.40 (m, 1H), 4.33 (dd, *J* = 12.4, 4.8 Hz, 1H), 4.08 (d, *J* = 12.4 Hz, 1H), 2.08 (s, 3H), 2.06 (s, 6H), 1.94 (s, 3H). **<sup>13</sup>C NMR** (101 MHz, Chloroform-*d*)  $\delta$  170.8, 170.0, 169.9, 169.7, 165.3, 152.1, 136.7, 130.1, 125.3, 124.3, 119.8, 71.6, 71.6, 70.2, 70.0, 68.4, 61.8, 20.9, 20.9, 20.8, 20.8. **IR** (thin film, cm<sup>-1</sup>): 3006, 2989, 1741, 1434, 1367, 1275, 1260, 1211, 1033, 914, 764 and 750.  $[\alpha]_D^{25}$  = +69.3 (c = 0.52, CHCl<sub>3</sub>). **HRMS (ESI) m/z:** [M+Na]<sup>+</sup> **Calcd for** C<sub>21</sub>H<sub>22</sub>BrNO<sub>9</sub>SNa 566.0091, found: 566.0090.

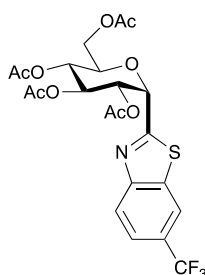

**(2R,3R,4S,5R,6S)-2-(acetoxymethyl)-6-(6-(trifluoromethyl)benzo[d]thiazol-2-yl)tetrahydro-2H-pyran-3,4,5-triyl triacetate (18t)**

Following **General Procedure**, product **18t** was prepared from **12a** (0.20 mmol, 90 mg), **14i** (0.40 mmol, 86.9 mg), **AIBN** (0.02 mmol, 3.2 mg, 10 mol%). Purification by flash chromatography (SiO<sub>2</sub>, petroleum ether: EtOAc = 1:0 to 10:1) afforded the title product as a colorless oil (98.1 mg, 0.184 mmol, 92%).

**<sup>1</sup>H NMR** (400 MHz, Chloroform-*d*)  $\delta$  8.22 (s, 1H), 7.76 (d, *J* = 8.4 Hz, 1H), 5.91 (t, *J* = 8.4 Hz, 1H), 5.63 (d, *J* = 5.6 Hz, 1H), 5.39 (dd, *J* = 8.4, 6.0 Hz, 1H), 5.15 (t, *J* = 8.4 Hz, 1H), 4.49 – 4.42 (m, 1H), 4.35 (dd, *J* = 12.4, 5.2 Hz, 1H), 4.09 (dd, *J* = 12.0, 1.6 Hz, 1H), 2.08 (s, 3H), 2.06 (s, 3H), 2.05 (s, 3H), 1.94 (s, 3H). **<sup>13</sup>C NMR** (101 MHz,

Chloroform-*d*)  $\delta$  170.7, 169.9, 169.8, 169.7, 168.4, 155.1, 135.2, 128.14 (q,  $J = 32.7$  Hz), 124.6, 124.1 (q,  $J = 273$  Hz), 123.5 (q,  $J = 3.2$  Hz), 119.5 (q,  $J = 4.3$  Hz), 71.9, 71.6, 70.0, 69.9, 68.3, 61.7, 20.8, 20.8, 20.8, 20.7.  $^{19}\text{F}$  NMR (376 MHz, Chloroform-*d*)  $\delta$  -61.5. **IR** (thin film, cm<sup>-1</sup>): 3006, 2989, 1747, 1369, 1321, 1276, 1261, 1221, 1124, 1038, 897, 764 and 750.  $[\alpha]_D^{25} = +79.3$  (c = 0.31, CHCl<sub>3</sub>). **HRMS (ESI) m/z: [M+Na]<sup>+</sup> Calcd for C<sub>22</sub>H<sub>22</sub>F<sub>3</sub>NO<sub>9</sub>SNa 556.0860, found: 556.0861.**

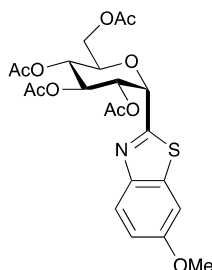

**(2R,3R,4S,5R,6S)-2-(acetoxymethyl)-6-(6-methoxybenzo[*d*]thiazol-2-yl)tetrahydro-2H-pyran-3,4,5-triyl triacetate (18u)**

Following **General Procedure**, product **18u** was prepared from **12a** (0.20 mmol, 90 mg), **14h** (0.40 mmol, 72 mg), **AIBN** (0.02 mmol, 3.2 mg, 10 mol%). Purification by flash chromatography (SiO<sub>2</sub>, petroleum ether: EtOAc = 1:0 to 10:1) afforded the title product as a colorless oil (93.1 mg, 0.188 mmol, 94%).

$^1\text{H}$  NMR (400 MHz, Chloroform-*d*)  $\delta$  8.01 (d,  $J = 9.2$  Hz, 1H), 7.33 (d,  $J = 2.0$  Hz, 1H), 7.11 (dd,  $J = 8.8, 2.0$  Hz, 1H), 6.04 (t,  $J = 8.8$  Hz, 1H), 5.55 (d,  $J = 6.0$  Hz, 1H), 5.34 (dd,  $J = 9.2, 6.0$  Hz, 1H), 5.16 (t,  $J = 9.2$  Hz, 1H), 4.47 – 4.40 (m, 1H), 4.30 (dd,  $J = 12.4, 4.4$  Hz, 1H), 4.06 (dd,  $J = 12.4, 2.0$  Hz, 1H), 3.87 (s, 3H), 2.07 (s, 3H), 2.04 (s, 6H), 1.94 (s, 3H).  $^{13}\text{C}$  NMR (101 MHz, Chloroform-*d*)  $\delta$  170.8, 170.1, 170.0, 169.8, 161.4, 158.3, 147.8, 136.6, 124.7, 116.1, 103.8, 71.6, 71.2, 70.4, 70.2, 68.7, 61.9, 55.9, 55.9, 20.8, 20.8, 20.8, 20.8. **IR** (thin film, cm<sup>-1</sup>): 3006, 2989, 1746, 1367, 1275, 1262, 1222, 1034, 910, 764 and 750.  $[\alpha]_D^{25} = +72.1$  (c = 0.36, CHCl<sub>3</sub>). **HRMS (ESI) m/z: [M+Na]<sup>+</sup> Calcd for C<sub>22</sub>H<sub>25</sub>NO<sub>10</sub>SNa 518.1091, found: 518.1091.**

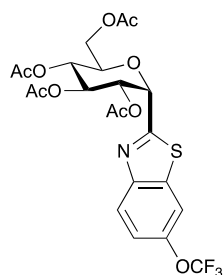

**(2R,3R,4S,5R,6S)-2-(acetoxymethyl)-6-(6-(trifluoromethoxy)benzo[*d*]thiazol-2-yl)tetrahydro-2H-pyran-3,4,5-triyl triacetate (18v)**

Following **General Procedure**, product **18v** was prepared from **12a** (0.20 mmol, 90 mg), **14j** (0.40 mmol, 93.3mg), **AIBN** (0.02 mmol, 3.2 mg, 10 mol%). Purification by flash chromatography (SiO<sub>2</sub>, petroleum ether: EtOAc = 1:0 to 10:1) afforded the title product as a colorless oil (97.7 mg, 0.178 mmol, 89%).

**<sup>1</sup>H NMR** (400 MHz, Chloroform-*d*)  $\delta$  8.14 (d, *J* = 8.8 Hz, 1H), 7.77 (s, 1H), 7.39 (d, *J* = 7.6 Hz, 1H), 5.94 (t, *J* = 8.4 Hz, 1H), 5.59 (d, *J* = 6.0 Hz, 1H), 5.37 (dd, *J* = 9.2, 6.0 Hz, 1H), 5.14 (t, *J* = 8.8 Hz, 1H), 4.46 – 4.39 (m, 1H), 4.34 (dd, *J* = 12.4, 4.8 Hz, 1H), 4.07 (dd, *J* = 12.4, 2.4 Hz, 1H), 2.07 (s, 3H), 2.05 (s, 3H), 2.04 (s, 3H), 1.94 (s, 3H). **<sup>13</sup>C NMR** (101 MHz, Chloroform-*d*)  $\delta$  170.7, 169.9, 169.9, 169.7, 166.1, 151.6, 147.0, 135.9, 125.1, 120.6 (q, *J* = 259.6 Hz), 120.5, 114.2, 71.7, 71.6, 70.1, 70.0, 68.4, 61.7, 20.8, 20.7, 20.7. **<sup>19</sup>F NMR** (376 MHz, Chloroform-*d*)  $\delta$  -58.0. **IR** (thin film, cm<sup>-1</sup>): 3006, 2989, 1744, 1453, 1368, 1275, 1260, 1214, 1167, 1036, 914, 764 and 750.  $[\alpha]_D^{25}$  = +74.2 (c = 0.30, CHCl<sub>3</sub>). **HRMS (ESI) m/z: [M+Na]<sup>+</sup> Calcd for C<sub>22</sub>H<sub>22</sub>F<sub>3</sub>NO<sub>10</sub>SNa 572.0809, found: 572.0809.**

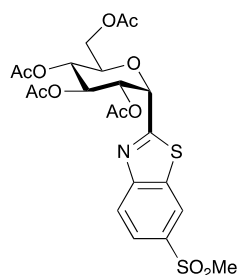

**(2R,3R,4S,5R,6S)-2-(acetoxymethyl)-6-(6-(methylsulfonyl)benzo[*d*]thiazol-2-yl)tetrahydro-2H-pyran-3,4,5-triyl triacetate (18w)**

Following **General Procedure**, product **18w** was prepared from **12a** (0.20 mmol, 90 mg), **14k** (0.40 mmol, 91 mg), **AIBN** (0.02 mmol, 3.2 mg, 10 mol%). Purification by flash chromatography (SiO<sub>2</sub>, petroleum ether: EtOAc = 1:0 to 4:1) afforded the title product as a colorless oil (95.3 mg, 0.154 mmol, 77%).

**<sup>1</sup>H NMR** (400 MHz, Chloroform-*d*)  $\delta$  8.56 (d, *J* = 1.2 Hz, 1H), 8.28 (d, *J* = 8.4 Hz, 1H), 8.05 (dd, *J* = 8.8, 1.6, 1H), 5.83 (t, *J* = 8.0 Hz, 1H), 5.64 (d, *J* = 5.2 Hz, 1H), 5.39 (dd, *J* = 8.4, 5.6 Hz, 1H), 5.13 (t, *J* = 8.0 Hz, 1H), 4.48 – 4.41 (m, 1H), 4.37 (dd, *J* = 12.4, 5.6 Hz, 1H), 4.10 (dd, *J* = 12.4, 2.4 Hz, 1H), 3.11 (s, 3H), 2.07 (s, 3H), 2.06 (s, 3H), 2.05 (s, 3H), 1.93 (s, 3H). **<sup>13</sup>C NMR** (101 MHz, Chloroform-*d*)  $\delta$  170.7, 170.5, 169.8, 169.8, 169.6, 156.1, 137.9, 135.6, 125.1, 125.0, 122.4, 72.1, 71.6, 69.7, 68.1, 61.5, 44.9, 20.8, 20.8, 20.7. **IR** (thin film, cm<sup>-1</sup>): 3006, 2989, 1745, 1369, 1275, 1262, 1219, 1036, 912, 764 and 750.  $[\alpha]_D^{25}$  = +81.7 (c = 0.50, CHCl<sub>3</sub>). **HRMS (ESI) m/z: [M+Na]<sup>+</sup> Calcd for C<sub>28</sub>H<sub>29</sub>NO<sub>11</sub>S<sub>2</sub>Na 642.1074, found: 642.1074.**

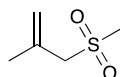

**2-methyl-3-(methylsulfonyl)prop-1-ene (19)**

Following **Procedure of Mechanism Experiment**, product **19** was prepared from **12a** (0.20 mmol, 90 mg), **16** (0.40 mmol, 59.8 mg), **AIBN** (0.02 mmol, 3.2 mg, 10 mol%). Purification by flash chromatography (SiO<sub>2</sub>, petroleum ether: EtOAc = 1:0 to 10:1) afforded the title product as a colorless oil.

**<sup>1</sup>H NMR** (400 MHz, Chloroform-*d*)  $\delta$  5.24 (s, 1H), 5.10 (s, 1H), 3.70 (s, 2H), 2.04 (s, 3H), 2.00 (s, 3H). **<sup>13</sup>C NMR** (101 MHz, Chloroform-*d*)  $\delta$  134.68, 120.64, 63.25, 22.67. **HRMS (ESI) m/z: [M+Na]<sup>+</sup> Calcd for C<sub>5</sub>H<sub>10</sub>O<sub>2</sub>SNa 157.0294, found: 157.0295.**

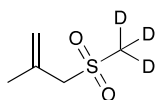

### 2-methyl-3-((methyl-*d*<sub>3</sub>)sulfonyl)prop-1-ene (**21**)

Following **Procedure of Mechanism Experiment**, product **21** was prepared from **12a** (0.20 mmol, 90 mg), **20** (0.40 mmol, 61 mg), **AIBN** (0.02 mmol, 3.2 mg, 10 mol%). Purification by flash chromatography (SiO<sub>2</sub>, petroleum ether: EtOAc = 1:0 to 10:1) afforded the title product as a colorless oil.

**<sup>1</sup>H NMR** (400 MHz, Chloroform-*d*) δ 5.24 (s, 1H), 5.10 (s, 1H), 3.69 (s, 2H), 2.00 (s, 3H). **<sup>13</sup>C NMR** (101 MHz, Chloroform-*d*) δ 134.55, 120.51, 63.12, 22.54. **HRMS (ESI) m/z: [M+Na]<sup>+</sup> Calcd for C<sub>5</sub>H<sub>7</sub>D<sub>3</sub>O<sub>2</sub>SNa 160.0482, found: 160.0484.**

## 9. Reference

1. L. Q. Wan, X. Zhang, Y. Zou, R. Shi, J. G. Cao, S. Y. Xu, L. F. Deng, L. Zhou, Y. Gong, X. Shu, G. Y. Lee, H. Ren, L. Dai, S. Qi, K. N. Houk and D. Niu, *J. Am. Chem. Soc.*, 2021, **143**, 11919–11926.
2. C. Zhang, H. Zuo, G. Y. Lee, Y. Zou, Q. D. Dang, K. N. Houk and D. Niu, *Nat. Chem.*, 2022, **14**, 686–694.
3. W. C. Yang, K. Wei, X. Sun, J. Zhu and L. Wu, *Org. Lett.*, 2018, **20**, 3144–3147.
4. J. X. Yu, Y. Y. Cheng, B. Chen, C. H. Tung and L. Z. Wu, *Angew. Chem., Int. Ed.*, 2022, **134**, e202209293.
5. C. Gao and S. A. Blum, *J. Org. Chem.*, 2022, **87**, 13124–13137.
6. Y. Jiao, X. Shi, L. Ju and S. Yu, *Organic Letters*, 2024, **26**, 390–395.
7. I. A. S. Smellie, A. Fromm, F. Fabbiani, I. D. H. Oswald, F. J. White and R. M. Paton, *Tetrahedron*, 2010, **66**, 7155–7160.

## 10. NMR Spectra

CDCI3, 400 MHz

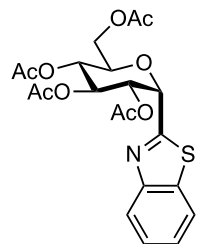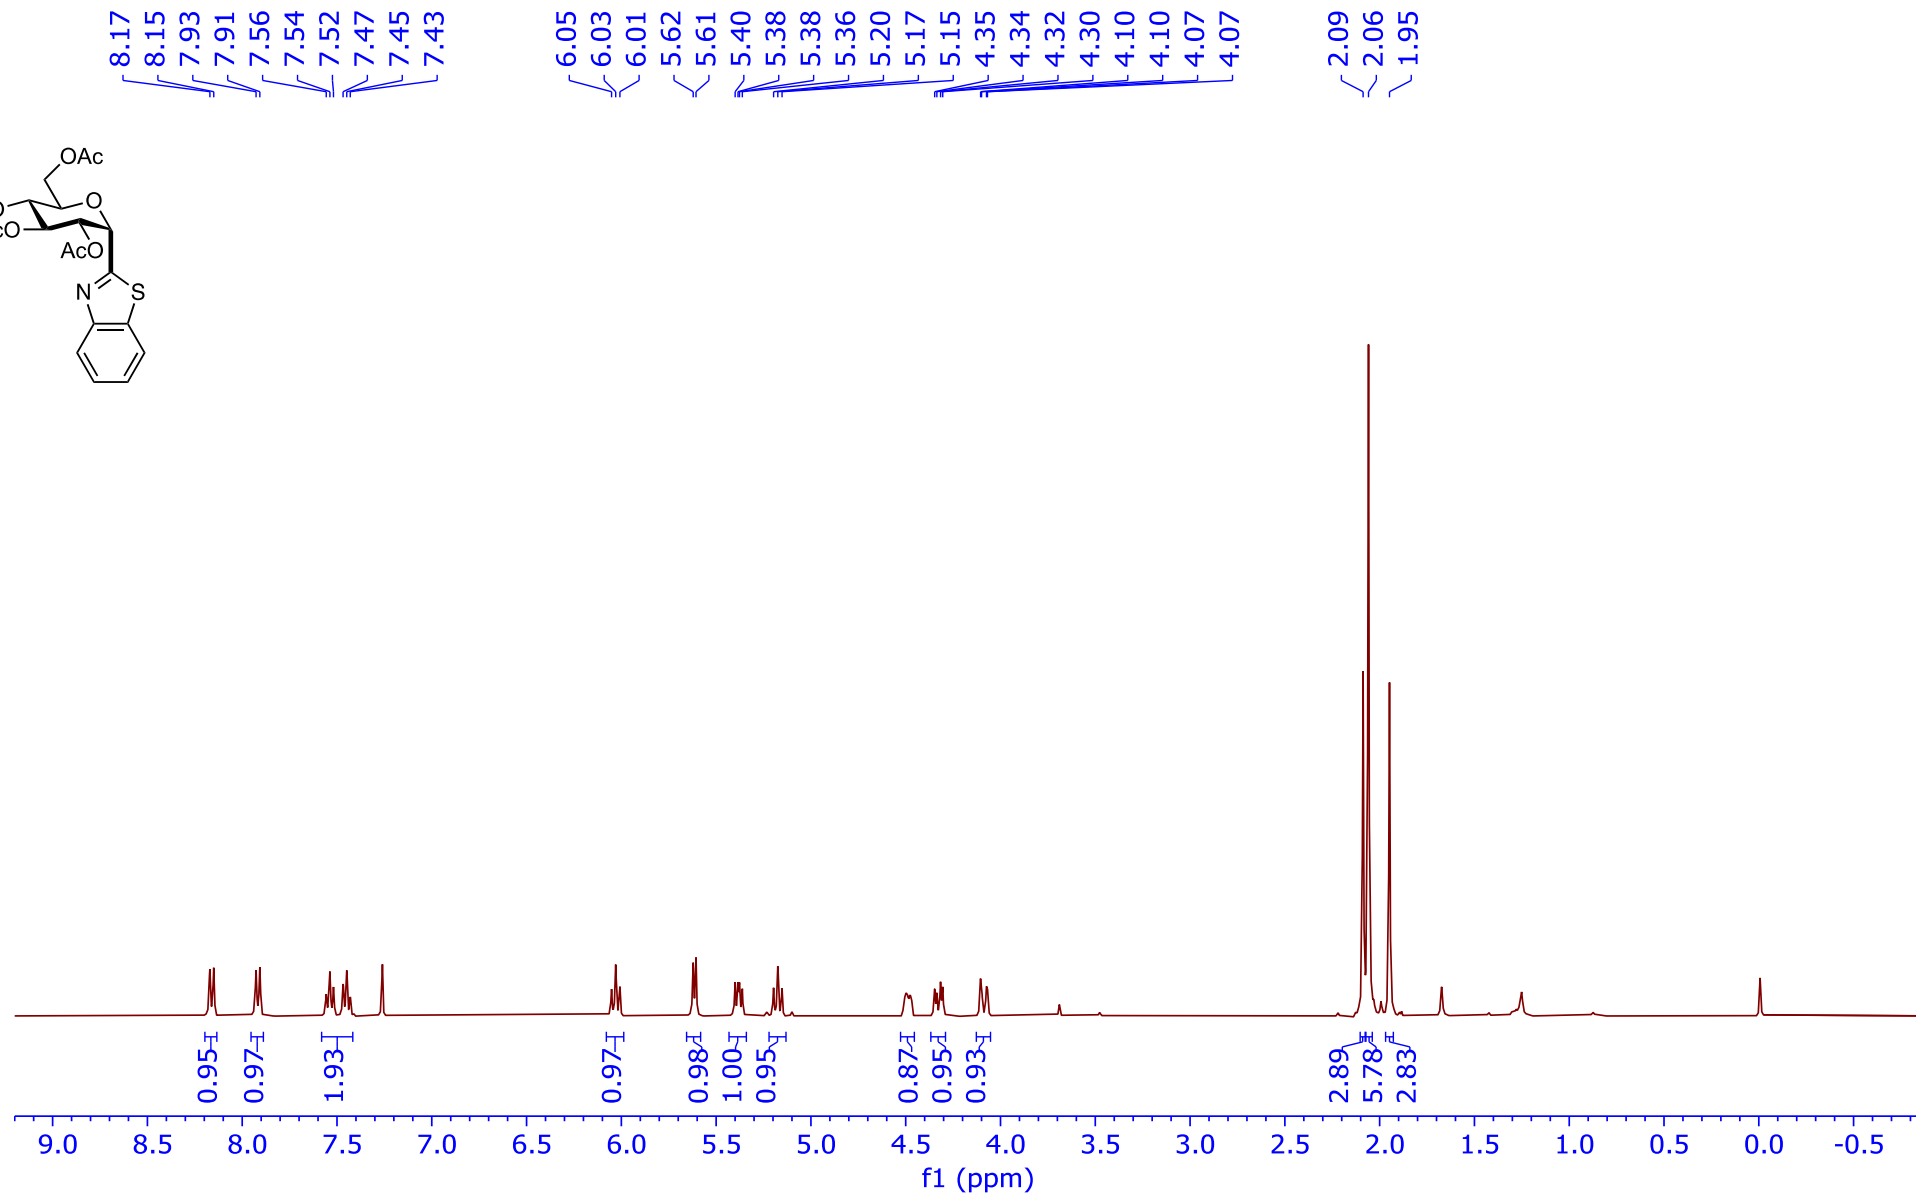

<sup>1</sup>H NMR Spectrum of 17a

CDCI3, 101 MHz

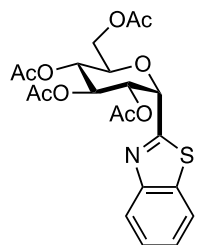

170.82  
170.08  
170.02  
169.80  
164.45

— 153.29

— 135.13

126.50  
125.96  
124.29  
121.74

71.75  
71.44  
70.38  
70.23  
68.62  
61.88

20.89  
20.88  
20.84  
20.80

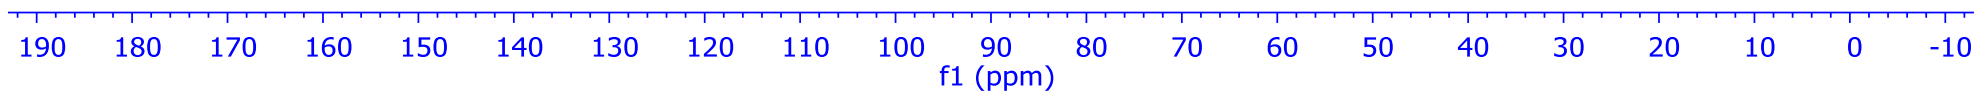

<sup>13</sup>C NMR Spectrum of 17a

CDCI3, 400 MHz

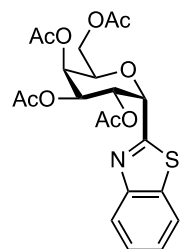

8.12  
8.10  
7.92  
7.90  
7.54  
7.52  
7.50  
7.45  
7.43  
7.41

5.95  
5.93  
5.93  
5.66  
5.65

4.74  
4.73

2.17  
2.05  
2.01  
1.94

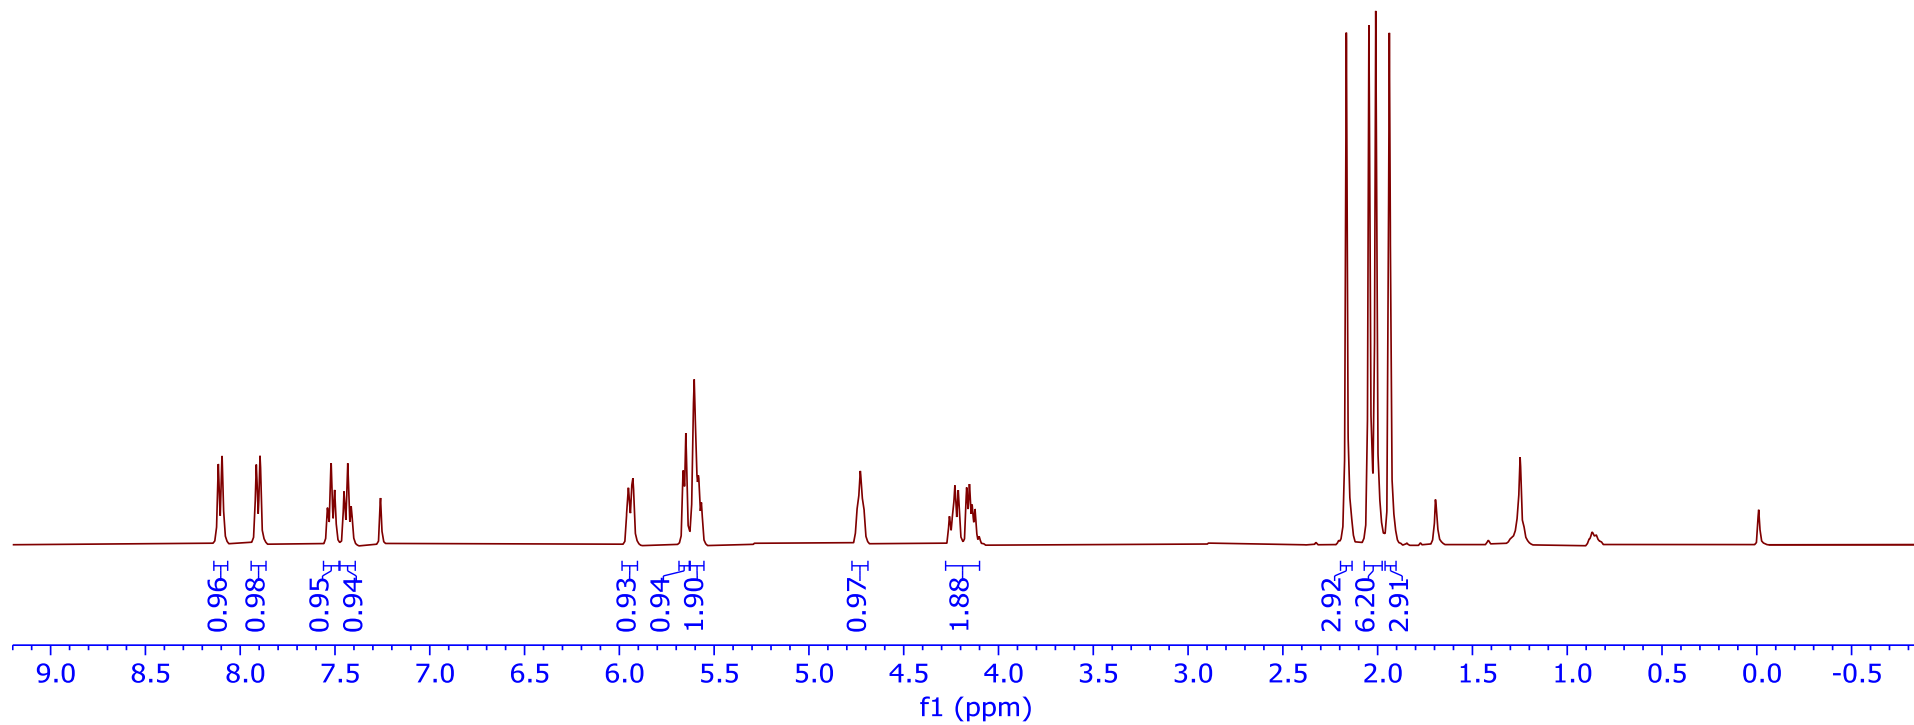

<sup>1</sup>H NMR Spectrum of 17b

CDCI3, 101 MHz

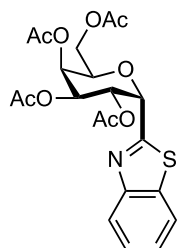

170.62  
170.23  
170.18  
169.86  
164.86

153.24

135.00

126.48

125.85

124.10

121.71

71.66

70.69

68.22

68.00

67.76

61.31

20.89

20.85

20.84

20.81

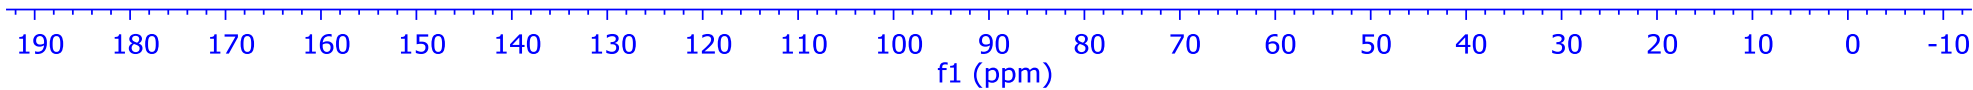

<sup>13</sup>C NMR Spectrum of 17b



CDCl<sub>3</sub>, 400 MHz

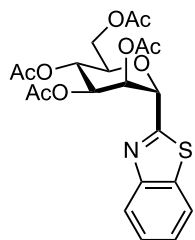

8.07  
8.06  
7.89  
7.87  
7.48  
7.46  
7.42  
7.40

6.17

5.58  
5.56

4.35  
4.34  
4.32  
4.31  
4.14  
4.11  
3.92

2.19  
2.11  
2.02  
1.97

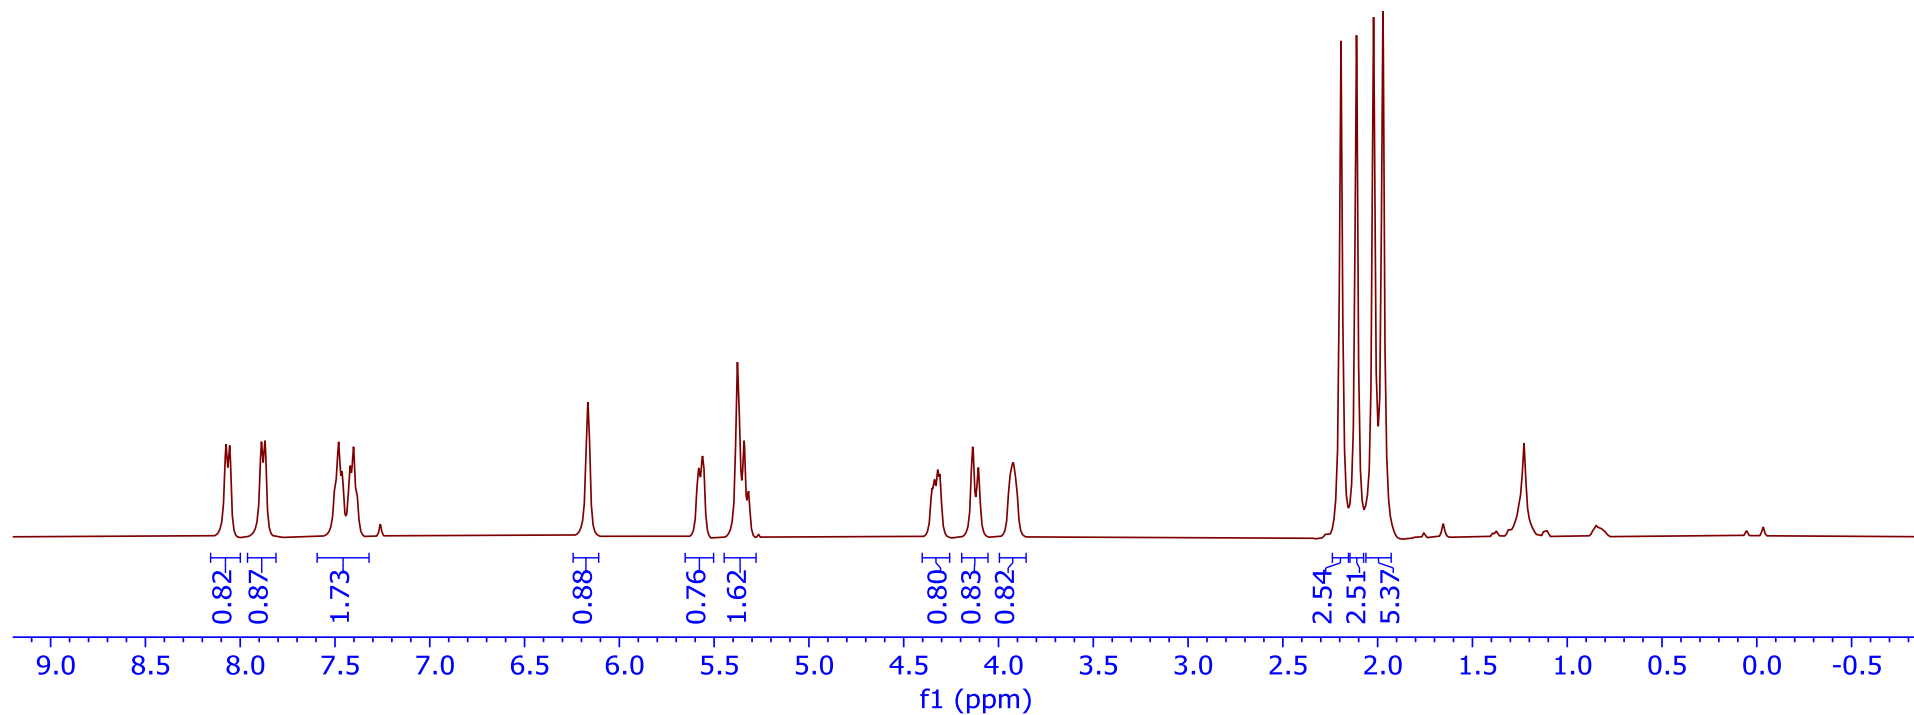

<sup>1</sup>H NMR Spectrum of 17c

CDCI3, 101 MHz

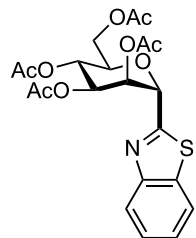

170.65  
170.12  
169.76  
169.73  
166.04

152.90

135.57

126.41  
126.01  
124.11  
121.77

76.15  
72.48  
69.72  
69.14  
66.61  
62.38

21.00  
20.79  
20.71  
20.67

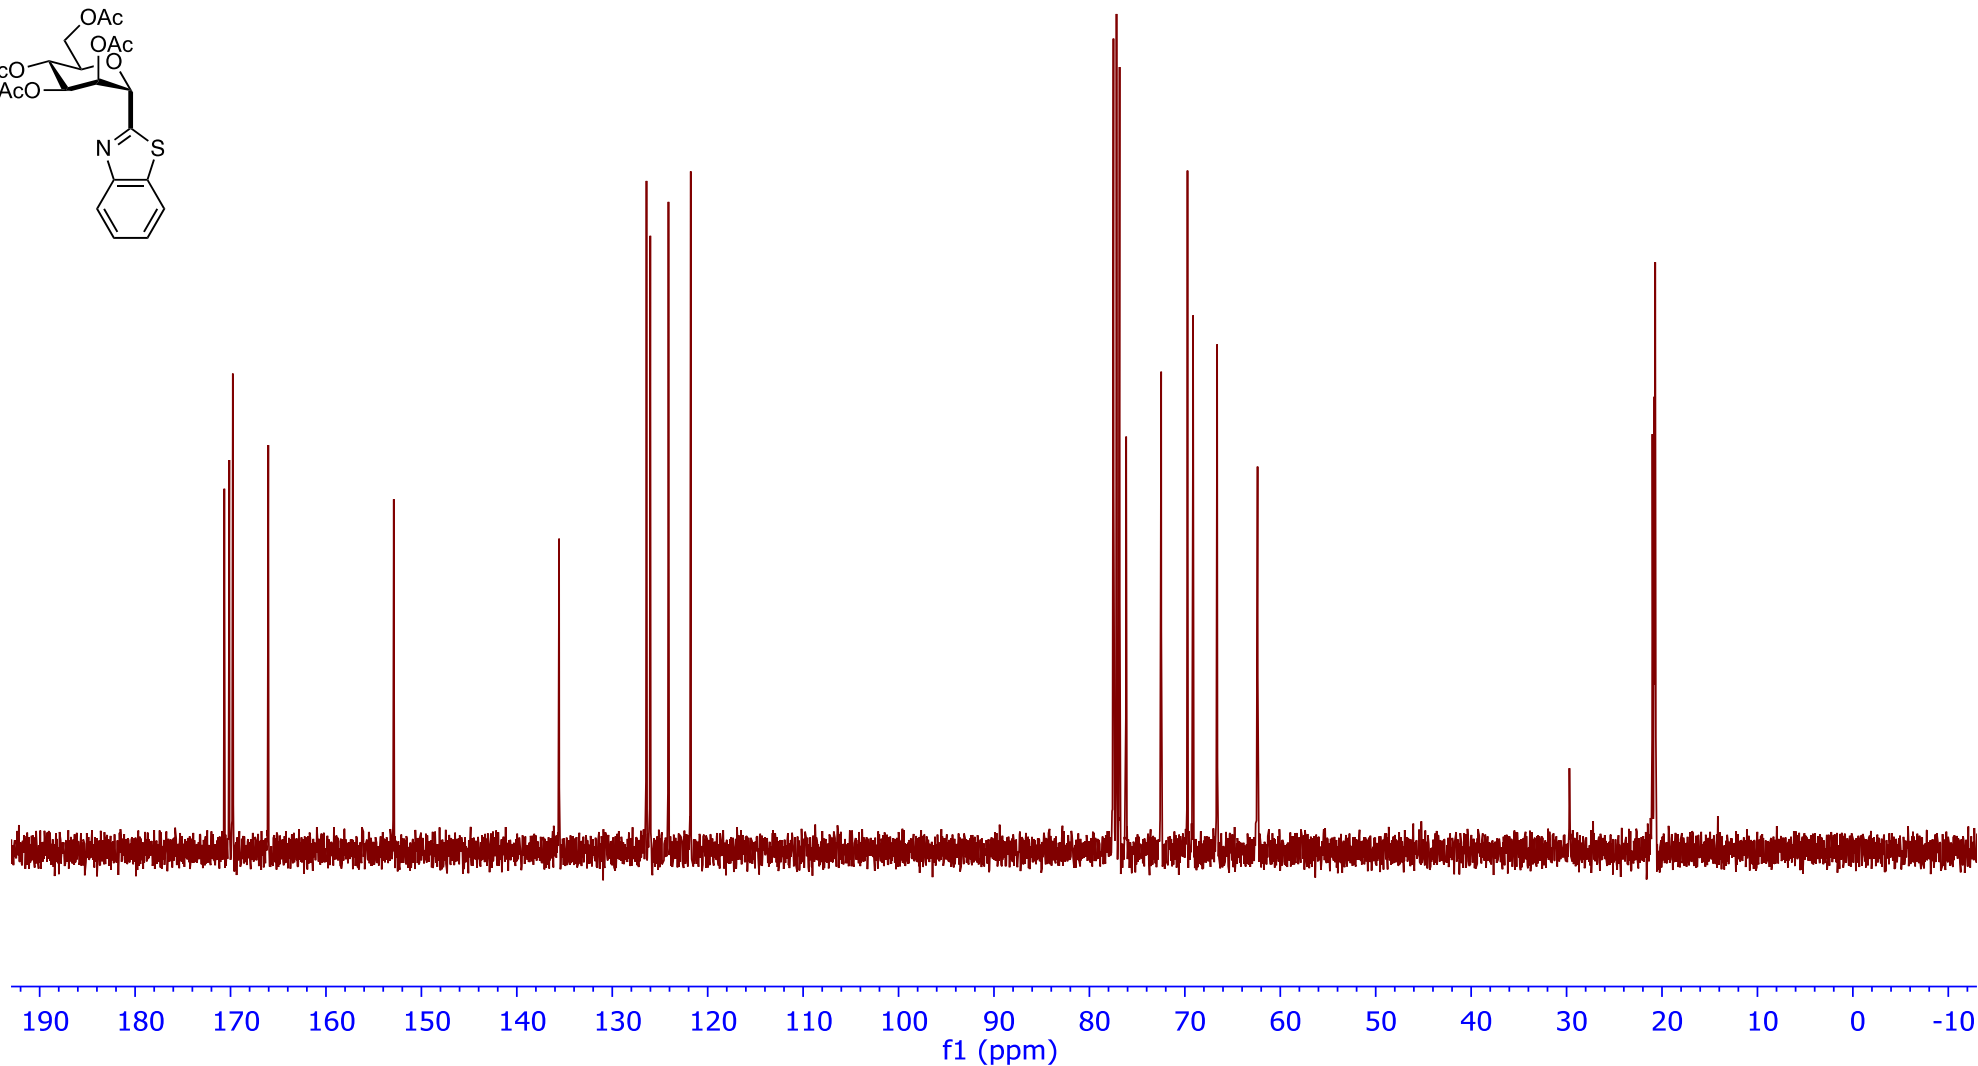

$^{13}\text{C}$  NMR Spectrum of 17c  
S26

CDCl<sub>3</sub>, 400 MHz

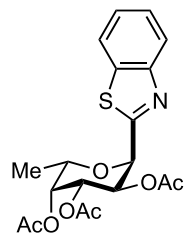

8.11  
8.09  
7.91  
7.89  
7.53  
7.51  
7.50  
7.44  
7.42  
7.41

5.99  
5.98  
5.96  
5.95  
5.45  
5.45  
5.44  
5.44

2.19  
2.03  
1.94

1.19  
1.18

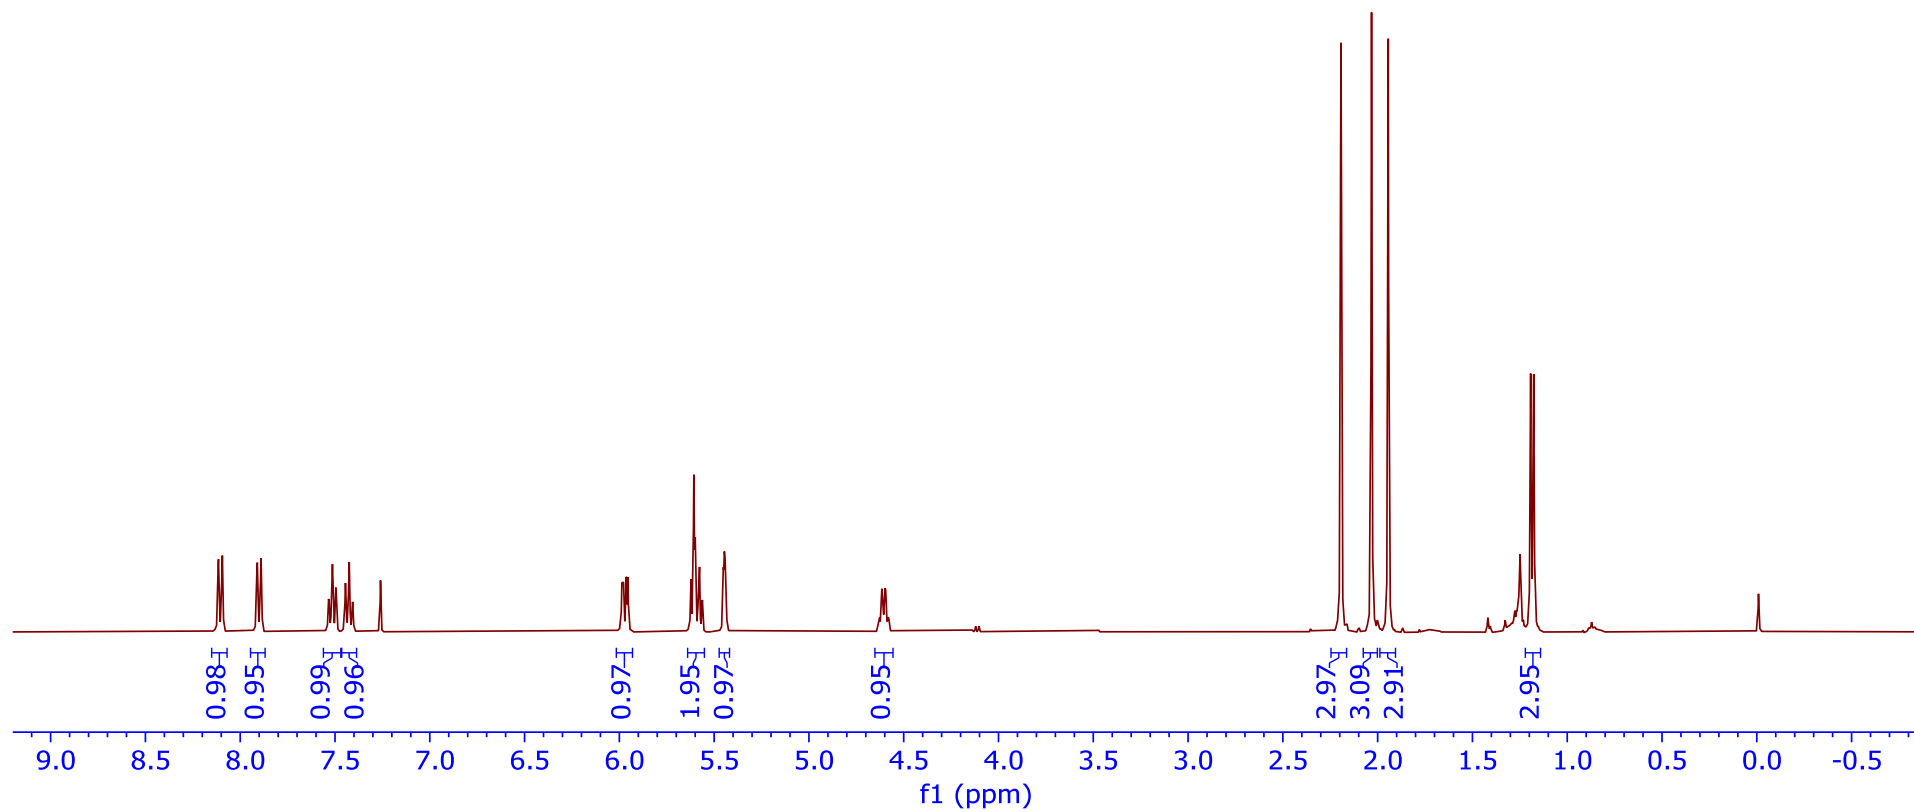

<sup>1</sup>H NMR Spectrum of 17d

CDCI3, 101 MHz

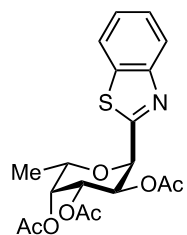

170.69  
170.36  
170.05  
165.34

153.27

135.06

126.42

125.79

124.06

121.68

71.91

70.81

68.65

68.16

20.91

20.84

16.05

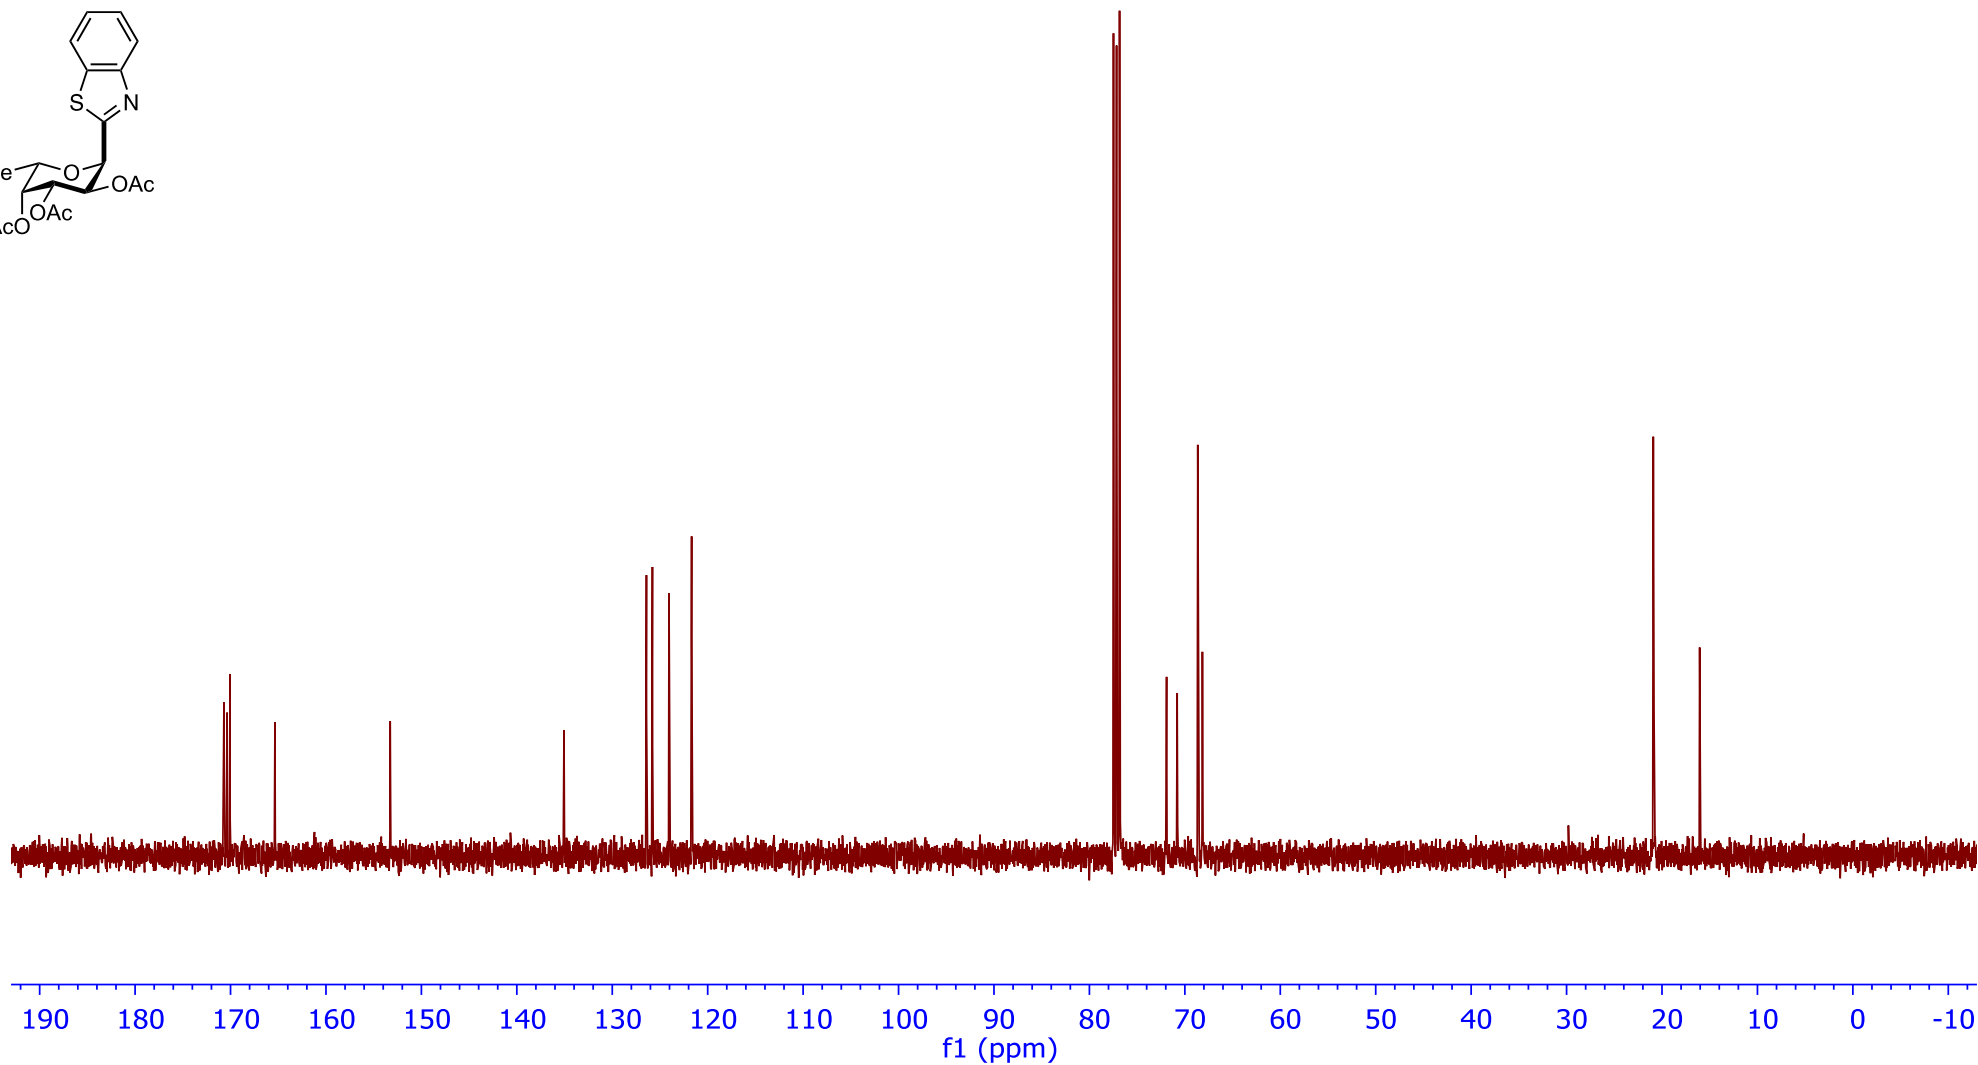

$^{13}\text{C}$  NMR Spectrum of 17d

S28

CDCl<sub>3</sub>, 400 MHz

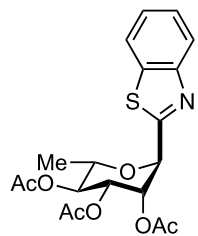

8.09  
8.07  
7.90  
7.88  
7.51  
7.49  
7.47  
7.43  
7.41  
7.39

6.18  
5.53  
5.53  
5.51  
5.50  
5.31  
5.19  
5.17  
5.14

2.21  
2.03  
1.99

1.29  
1.27

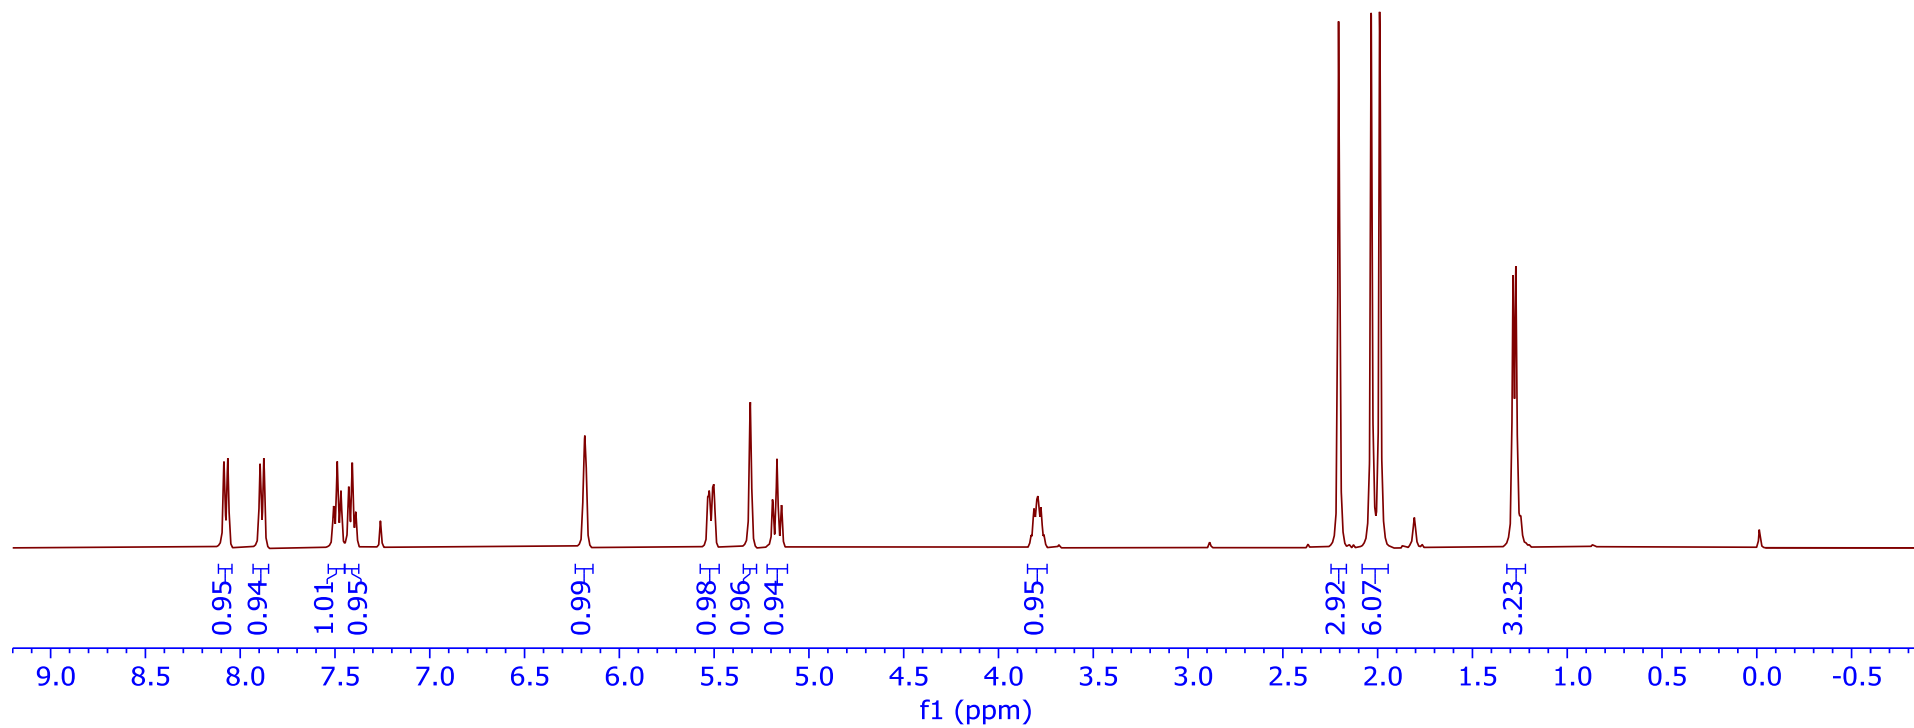

<sup>1</sup>H NMR Spectrum of 17e

CDCI3, 101 MHz

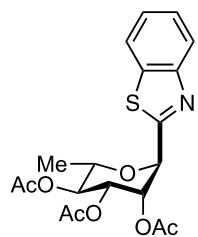

170.27  
170.04  
169.93  
167.10

153.03

135.64

126.36  
125.91  
124.11  
121.79

76.09  
71.40  
70.66  
70.10  
69.31

21.10  
20.84  
17.59

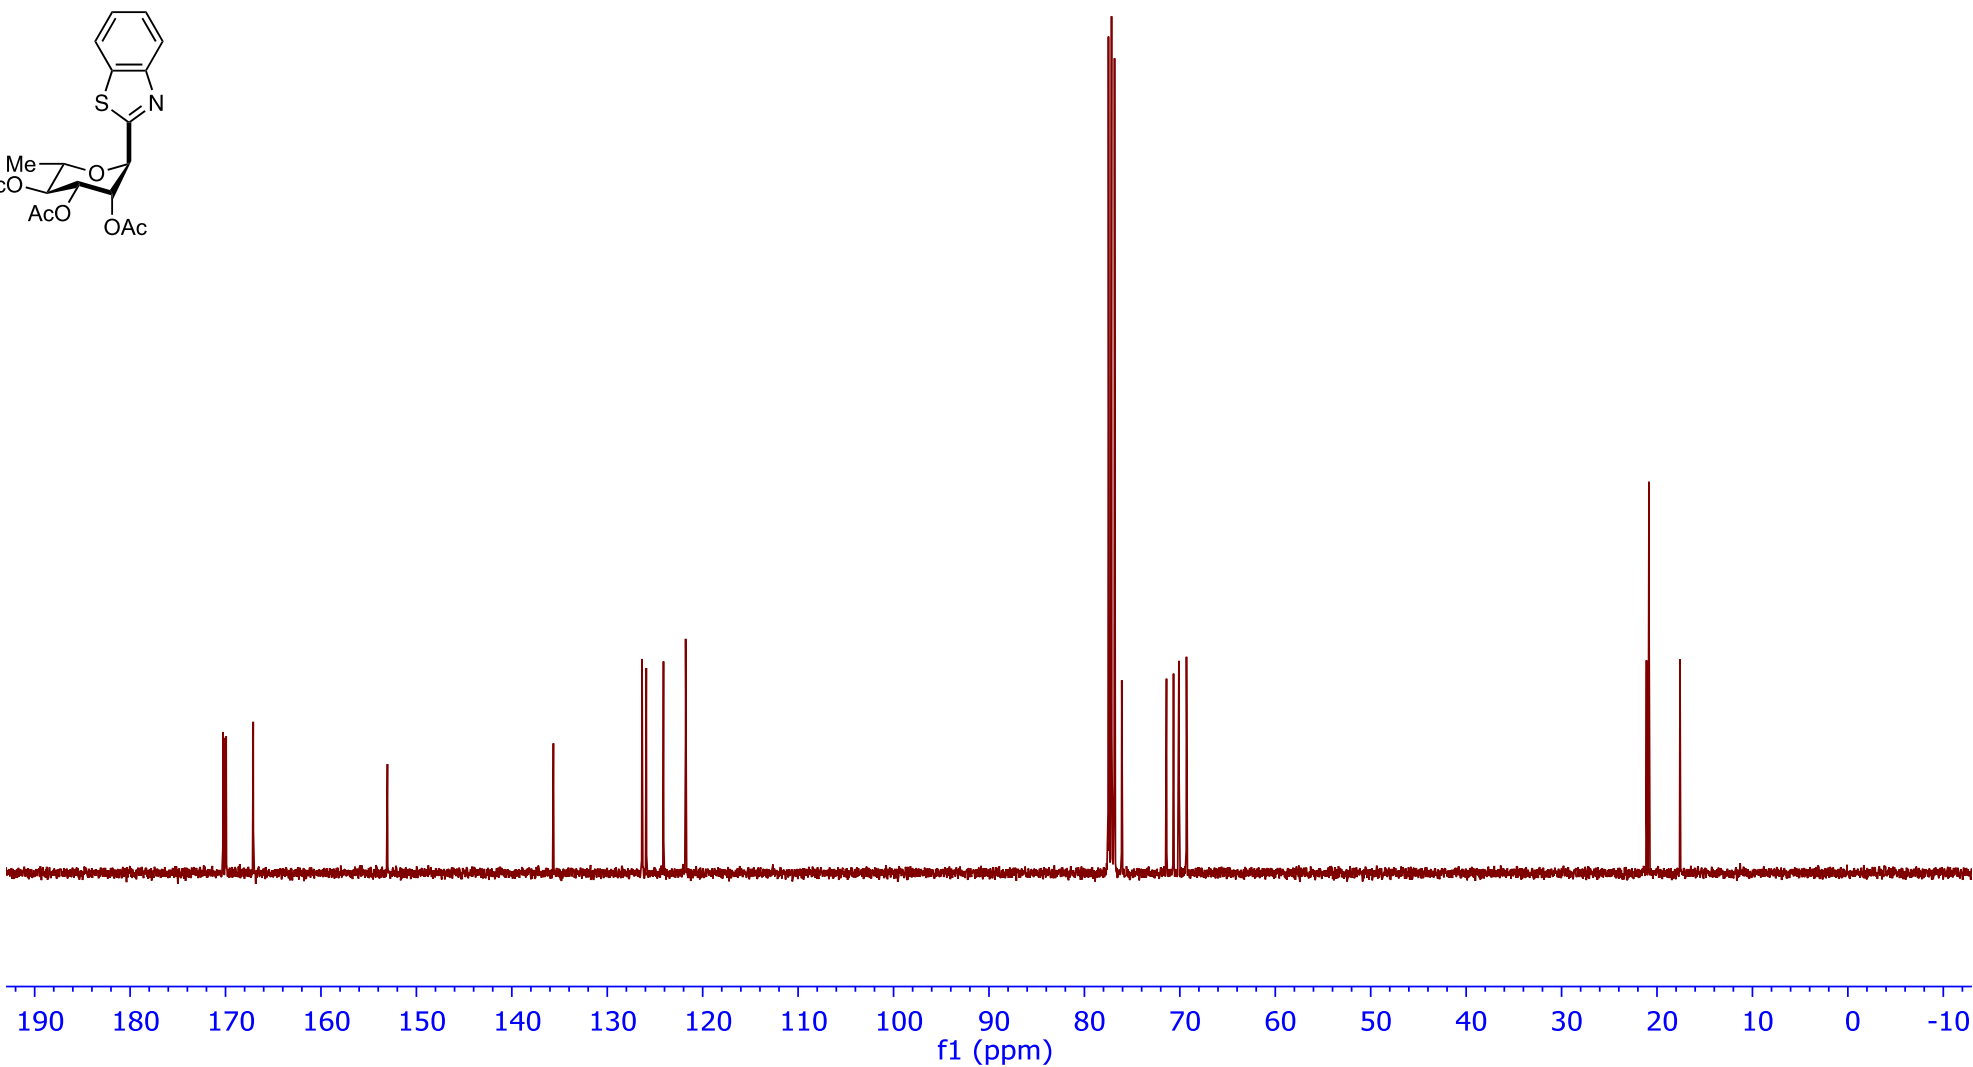

$^{13}\text{C}$  NMR Spectrum of 17e

S30

CDCl<sub>3</sub>, 400 MHz

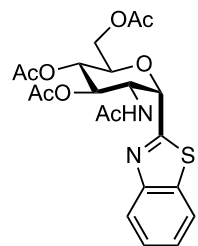

8.10  
8.08  
7.92  
7.90  
7.54  
7.52  
7.50  
7.46  
7.44  
7.43  
7.12  
7.09

5.74  
5.71  
5.69  
5.43  
5.41  
5.19  
5.17  
5.14  
4.21  
4.20  
4.18  
4.17  
4.06  
4.05  
4.03  
4.02

2.08  
2.04  
1.95  
1.93

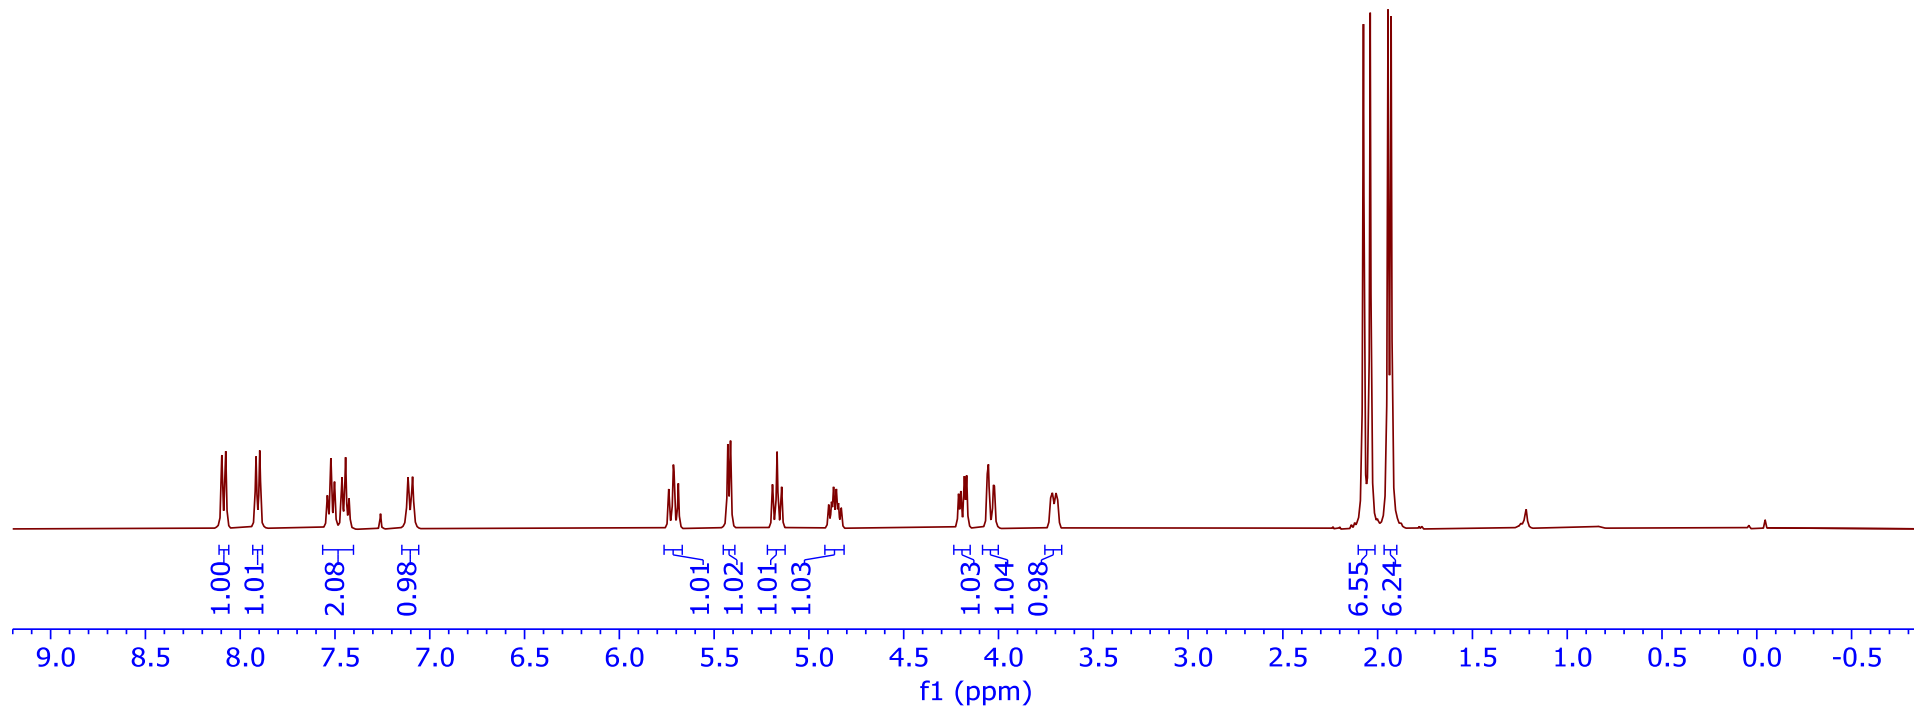

<sup>1</sup>H NMR Spectrum of 17f

CDCI3, 101 MHz

171.21  
170.63  
170.10  
169.31  
168.45

— 152.23

— 135.18

126.55  
126.29  
123.94  
121.91

73.88  
71.60  
71.44  
68.71  
62.00

— 50.90

23.43  
20.81  
20.74  
20.60

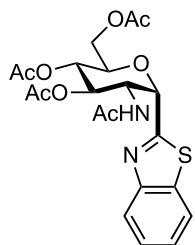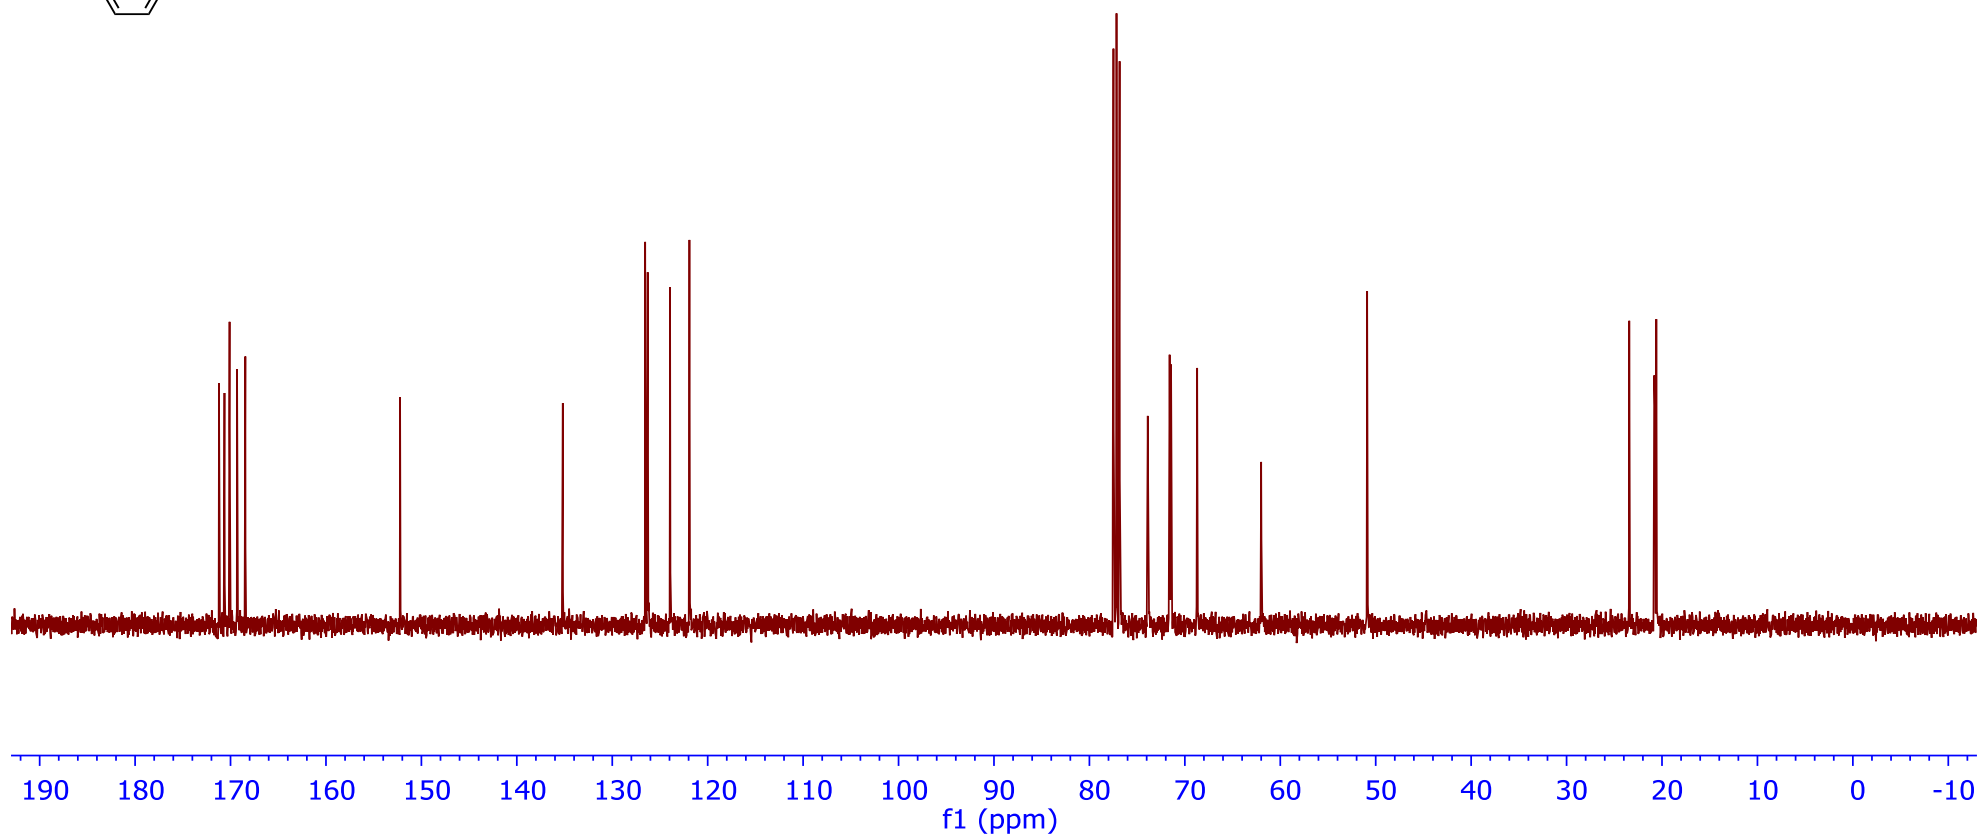

<sup>13</sup>C NMR Spectrum of 17f  
S32



CDCl<sub>3</sub>, 400 MHz

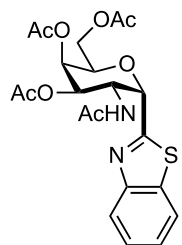

8.06  
8.04  
7.93  
7.91  
7.54  
7.53  
7.51  
7.47  
7.45  
7.44  
7.14  
7.12

5.64  
5.63  
5.61  
5.61  
5.48  
5.47  
5.38  
5.38

4.10  
4.09  
3.94  
3.93  
3.91

2.19  
2.03  
2.01  
1.97

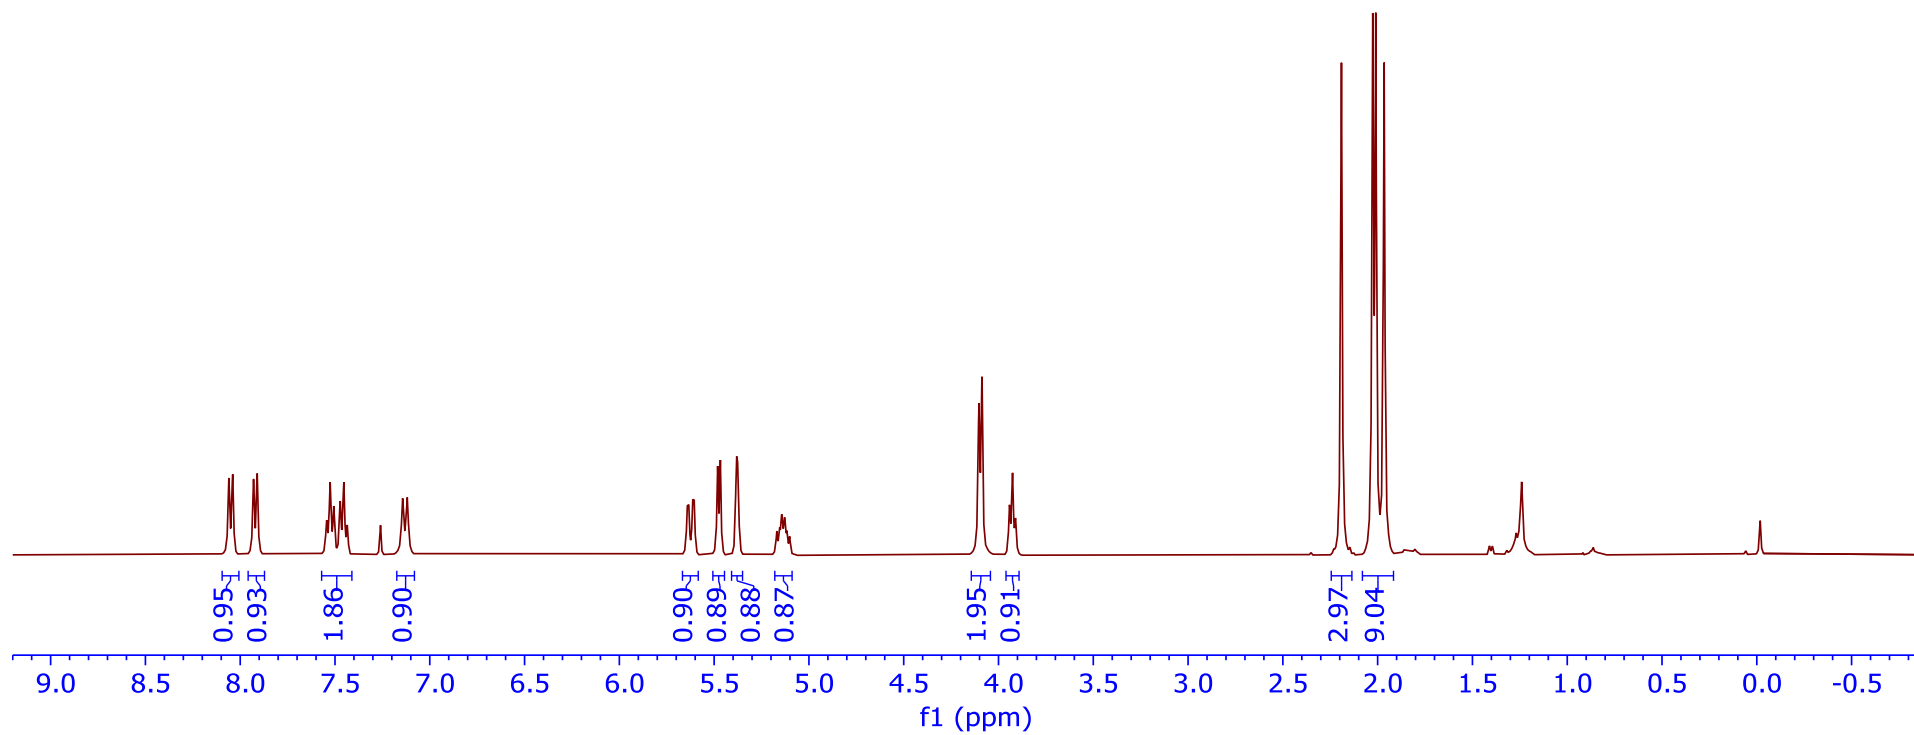

<sup>1</sup>H NMR Spectrum of 17g

CDCI3, 101 MHz

170.89  
170.46  
170.42  
170.29  
169.22

— 152.24

— 135.19

126.60

126.28

123.82

121.97

74.42

70.50

68.79

67.36

61.94

— 46.89

23.64

20.91

20.87

20.75

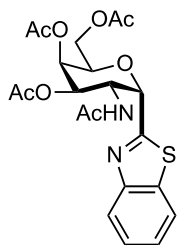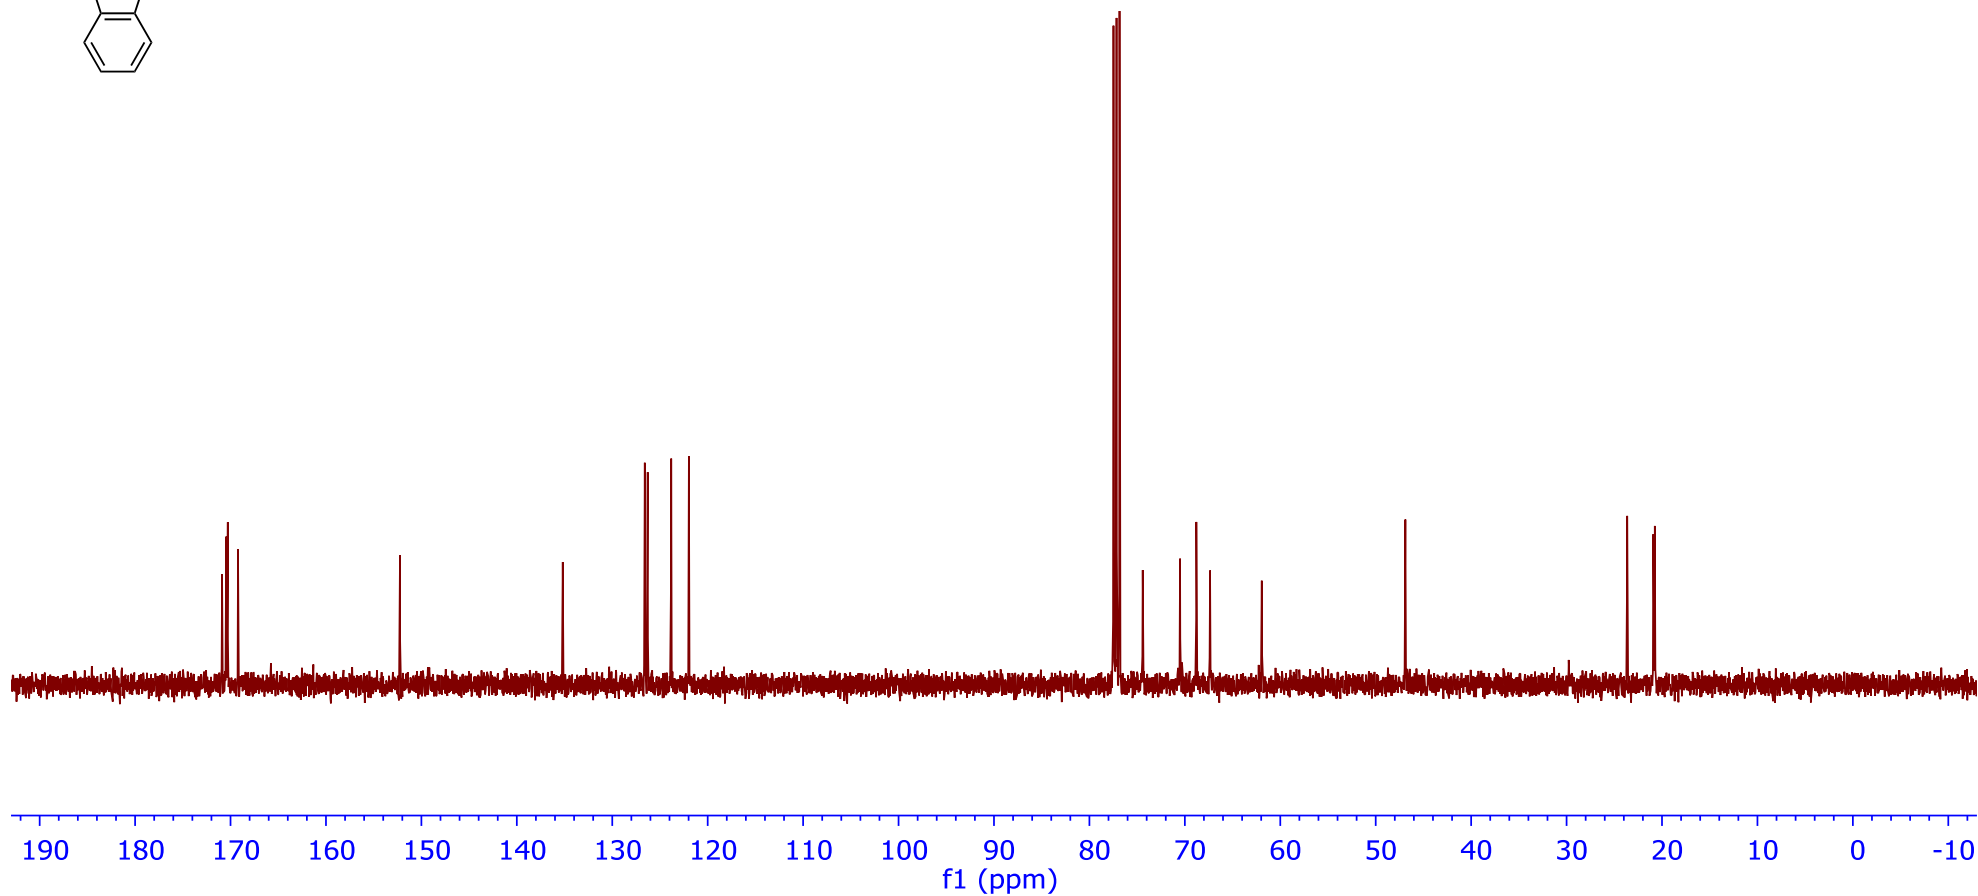

<sup>13</sup>C NMR Spectrum of 17g

CDCl<sub>3</sub>, 400 MHz

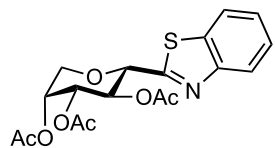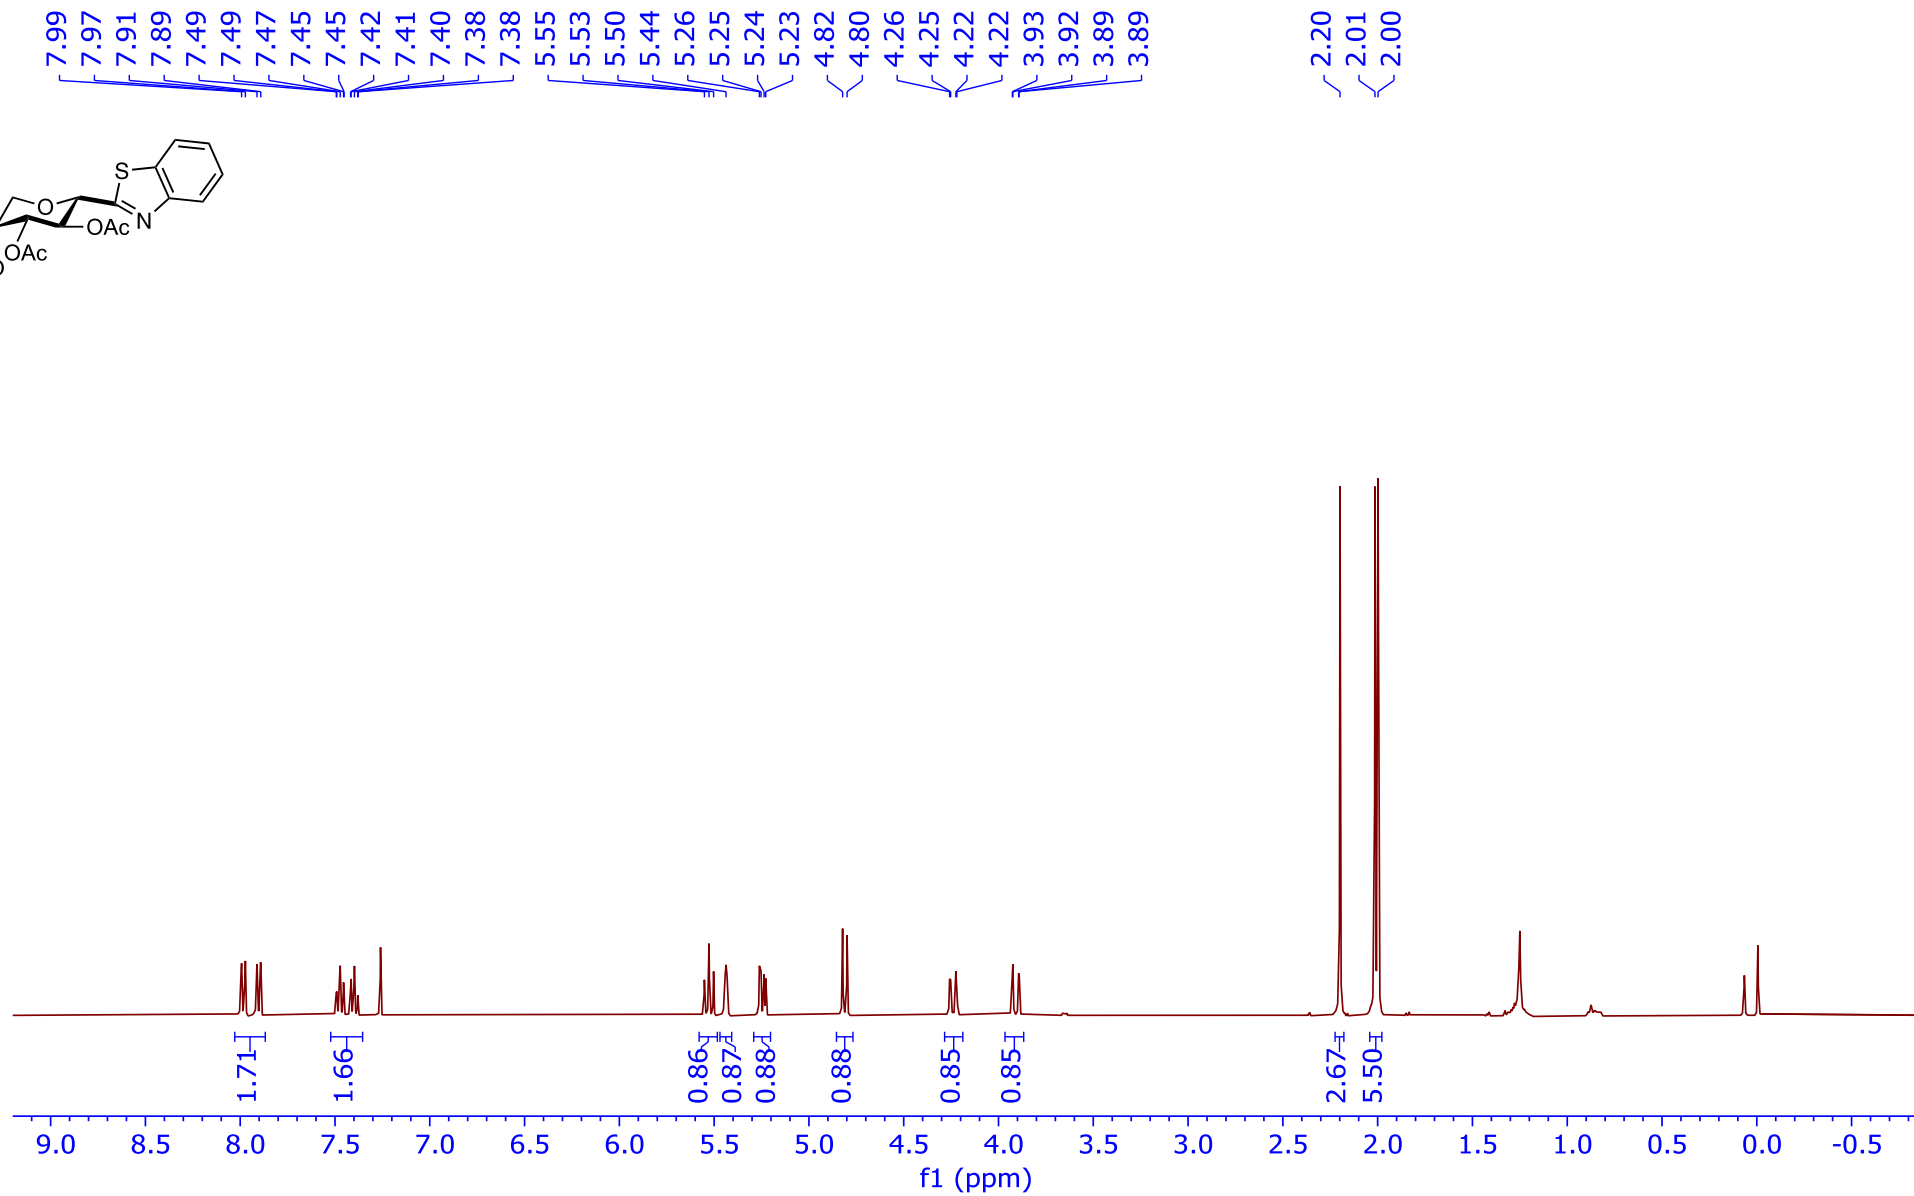

<sup>1</sup>H NMR Spectrum of 17h

CDCI3, 101 MHz

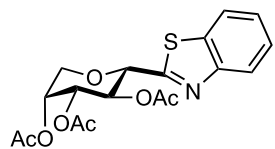

170.54  
170.29  
169.66  
167.34

152.77

135.00

126.32

125.63

123.42

122.01

78.58

71.30

69.10

68.55

68.47

21.13

20.84

20.82



<sup>13</sup>C NMR Spectrum of 17h

CDCl<sub>3</sub>, 400 MHz

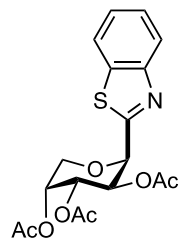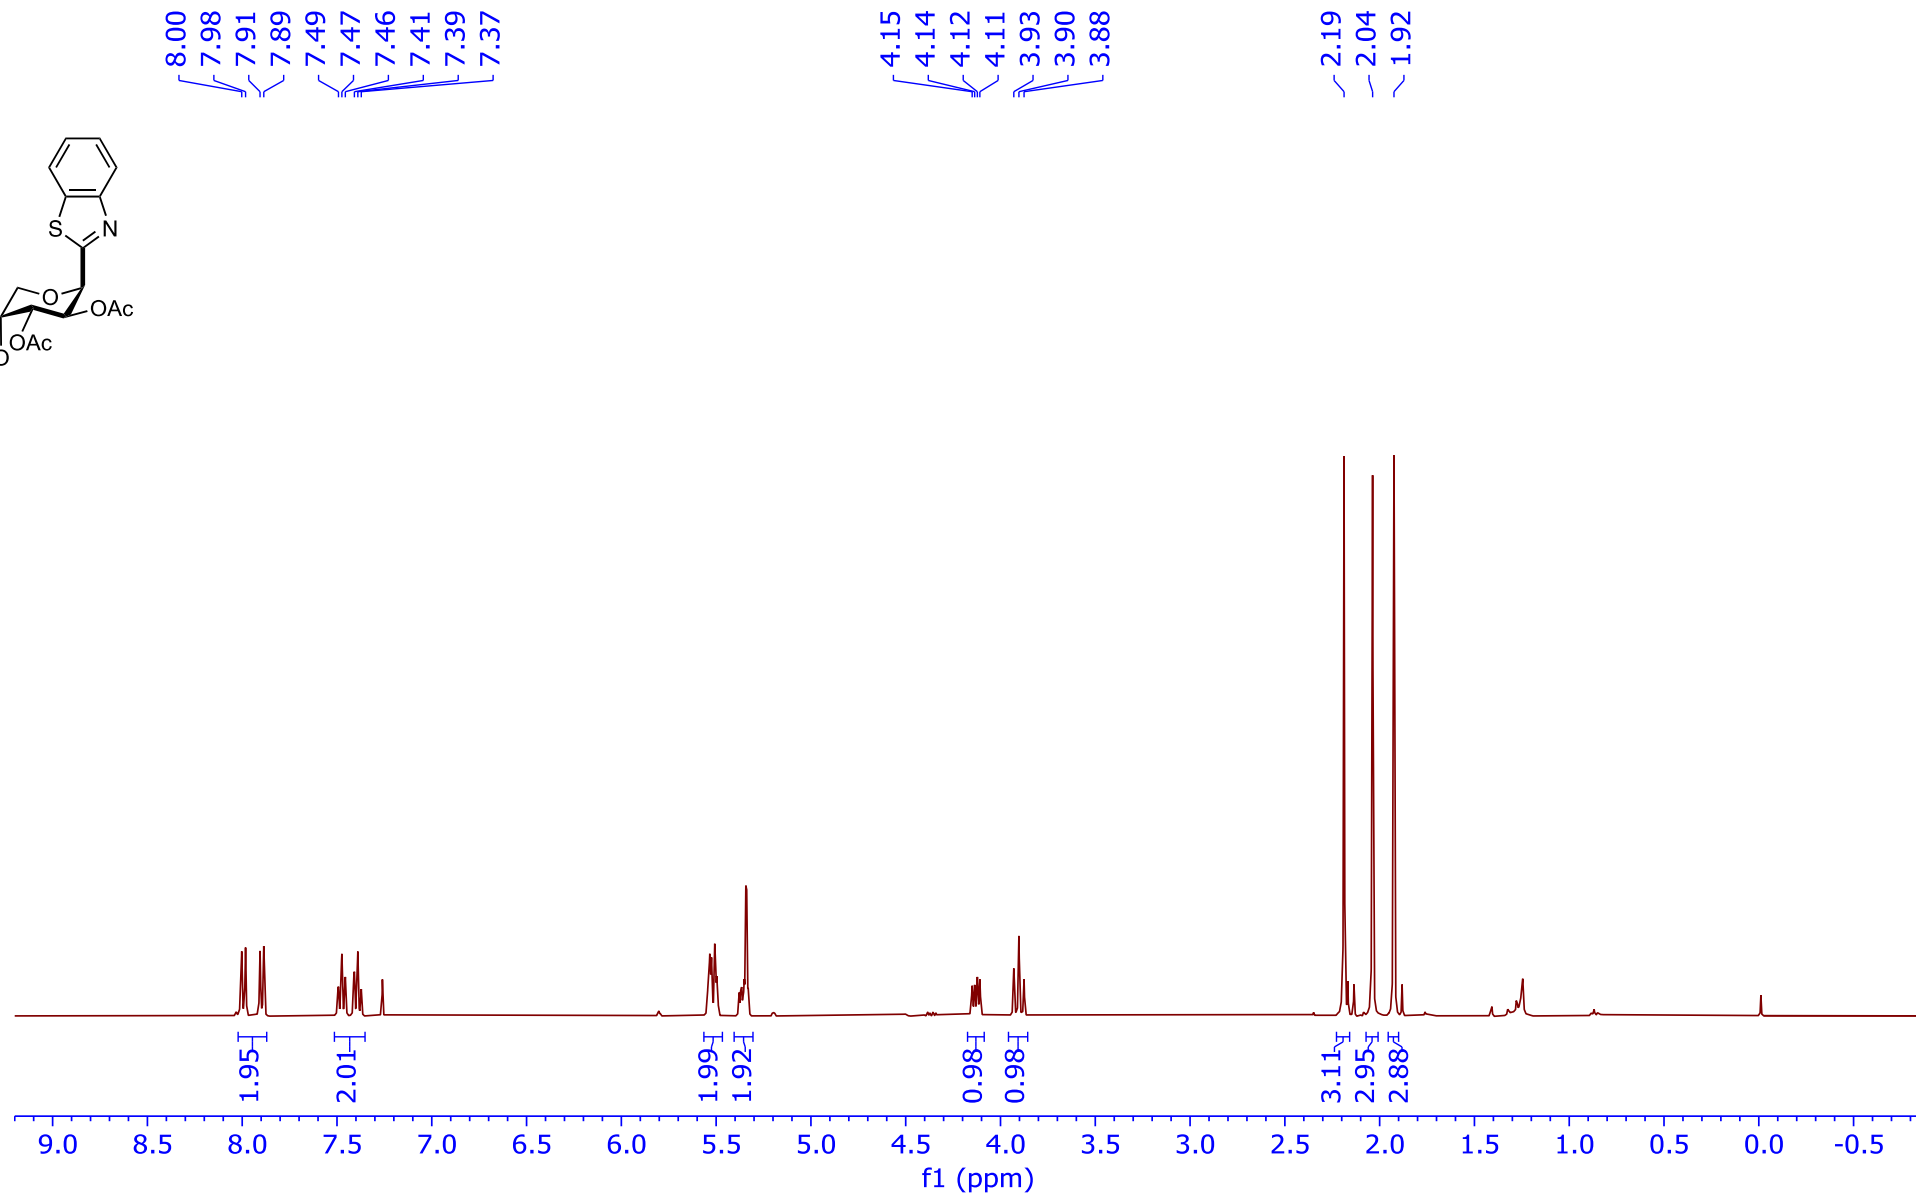

<sup>1</sup>H NMR Spectrum of 17h

CDCI3, 101 MHz

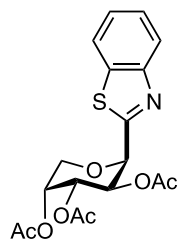

169.81  
169.16  
169.05  
167.46

152.76

134.86  
126.30  
125.37  
123.42  
121.78

75.01  
70.01  
66.44  
65.07  
64.30

20.91  
20.84  
20.67



<sup>13</sup>C NMR Spectrum of 17h  
S38

CDCl<sub>3</sub>, 400 MHz

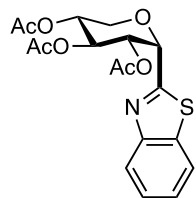

8.01  
7.99  
7.91  
7.89  
7.49  
7.47  
7.45  
7.41  
7.39  
7.37

5.33  
5.28  
— 4.81  
4.27  
4.23  
4.11  
4.07

2.16  
2.13  
1.92

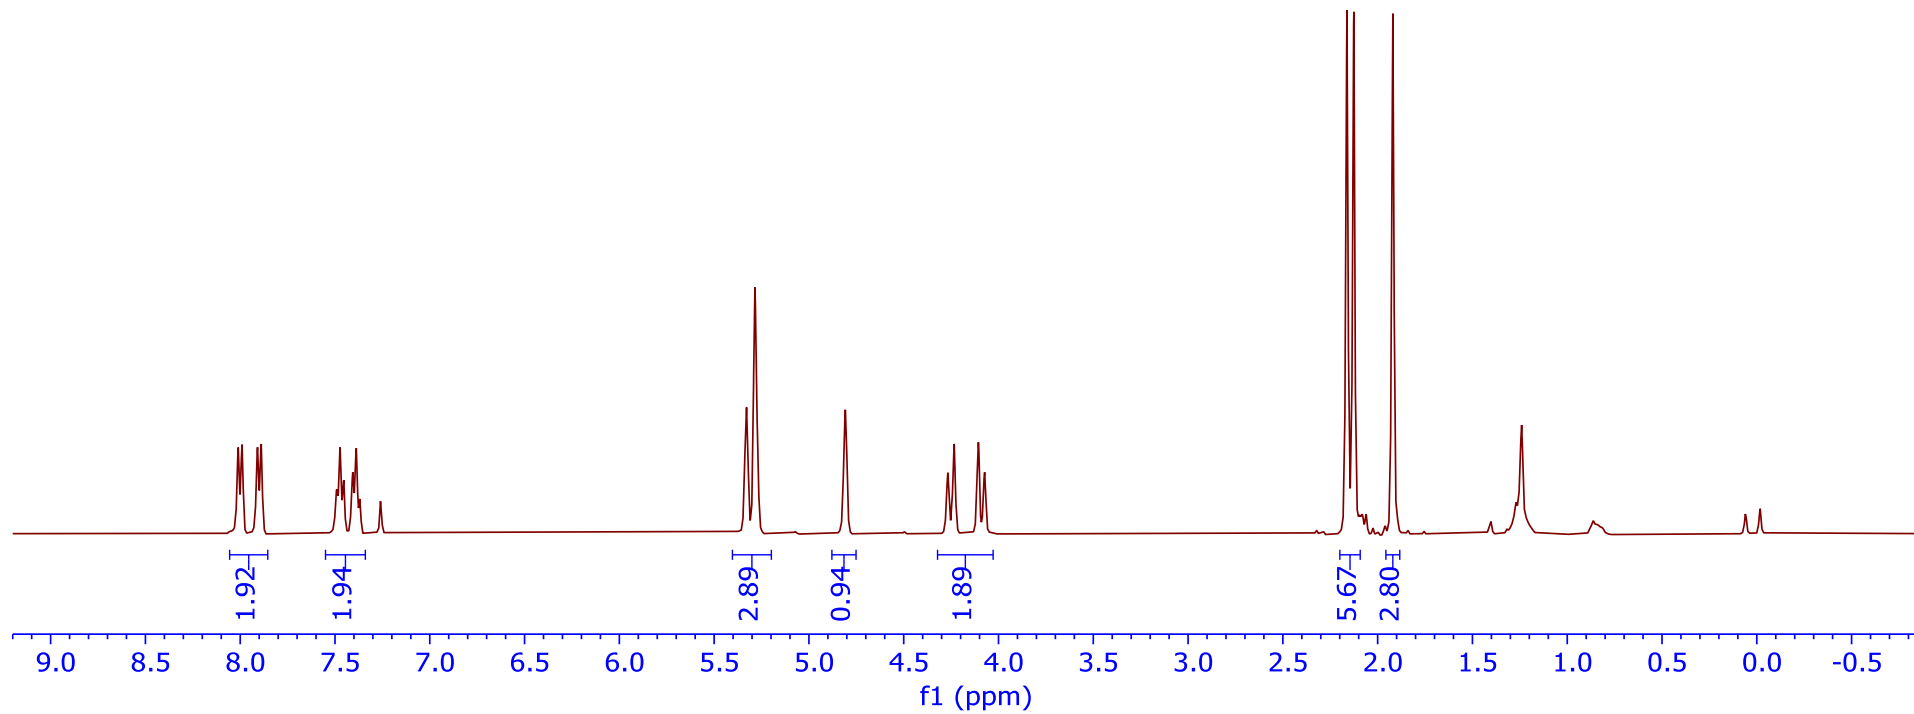

<sup>1</sup>H NMR Spectrum of 17i

CDCI3, 101 MHz

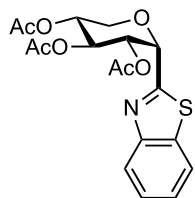

169.91  
169.47  
168.52  
167.88

152.75

134.89

126.25

125.33

123.41

121.77

75.19

68.16

66.85

66.52

65.92

21.12

20.92

20.65

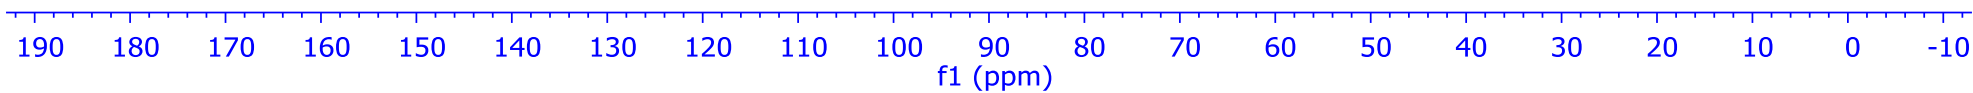

<sup>13</sup>C NMR Spectrum of 17i  
S40



CDCl<sub>3</sub>, 400 MHz

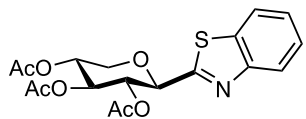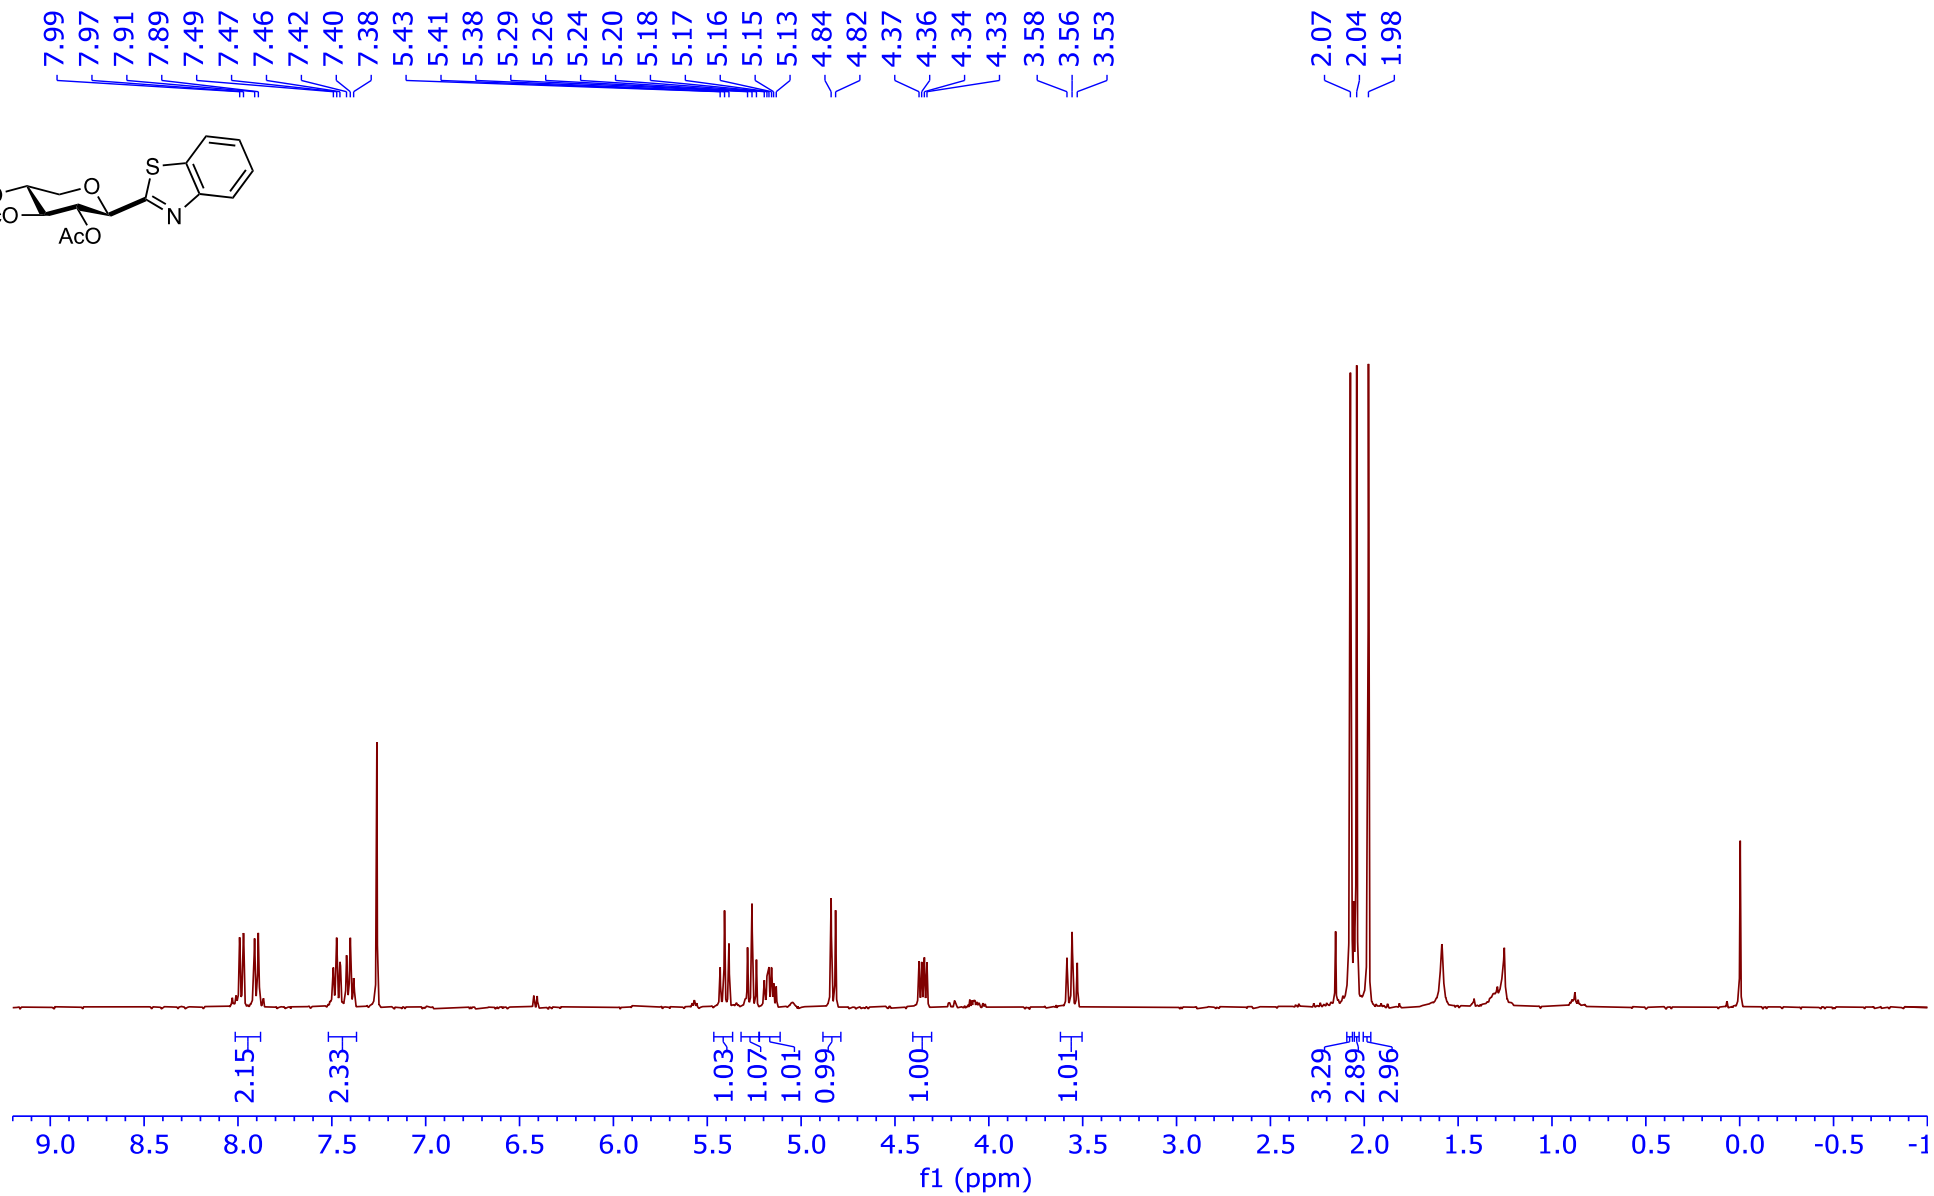

<sup>1</sup>H NMR Spectrum of 17i

CDCI3, 101 MHz

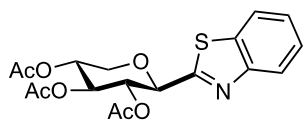

170.36  
170.00  
169.54  
166.87

152.78

134.97

126.38

125.72

123.48

122.06

78.27

75.12

71.75

69.08

67.29

29.84

20.86

20.73



<sup>13</sup>C NMR Spectrum of 17i  
S42

DMSO-6d, 400 MHz

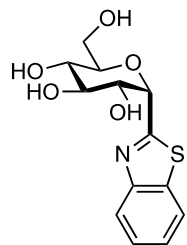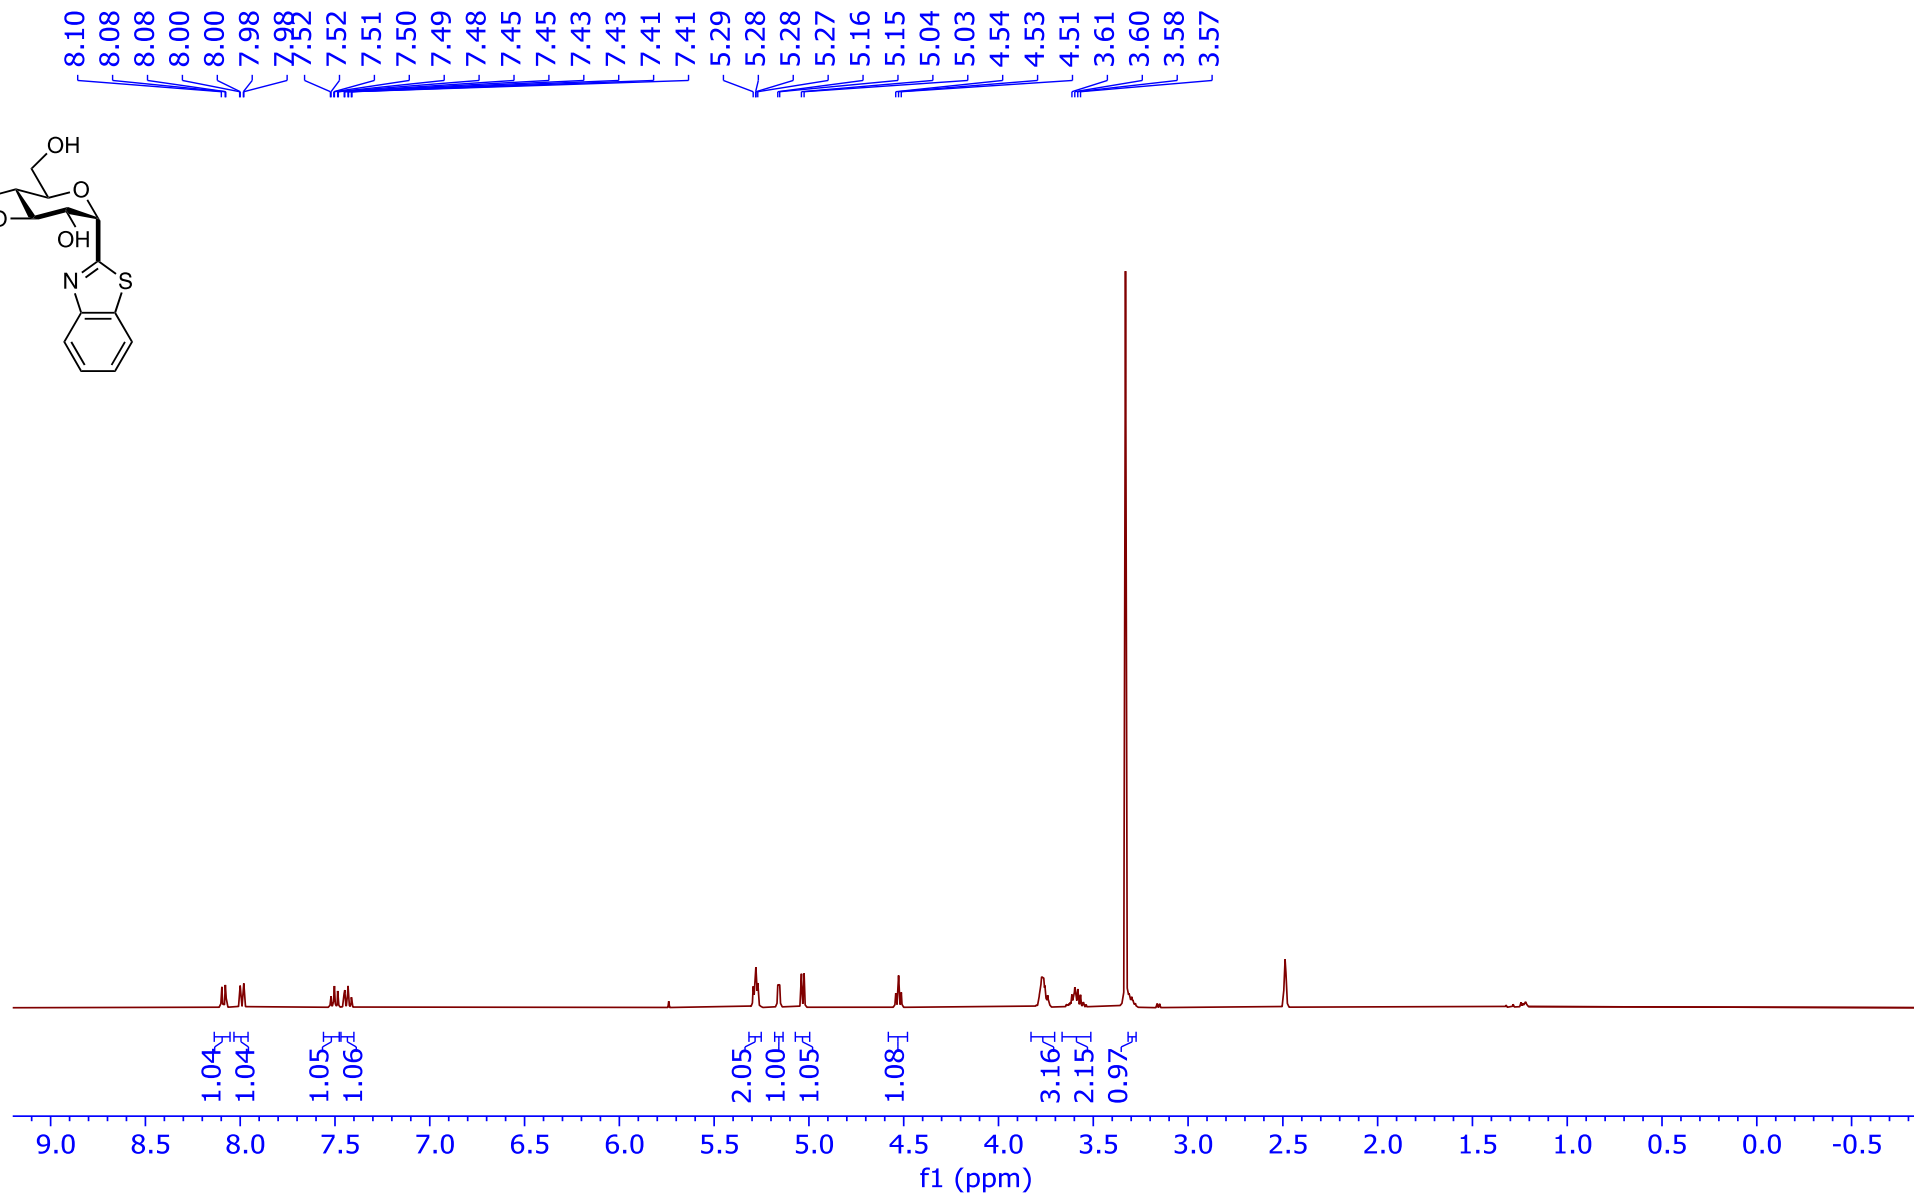

<sup>1</sup>H NMR Spectrum of 17k

DMSO-6d, 101 MHz

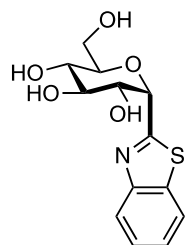

— 169.97

— 152.26

— 134.73

126.05

125.14

122.68

122.04

77.35

73.94

72.69

71.69

69.76

— 60.65

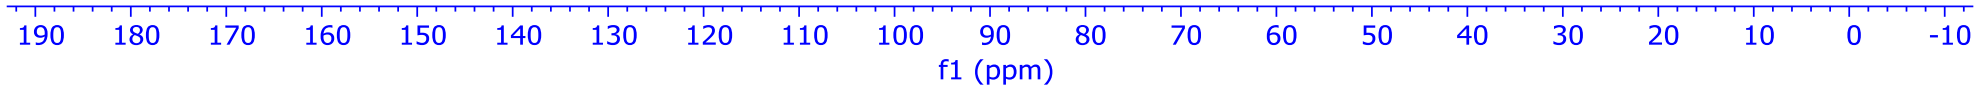

<sup>13</sup>C NMR Spectrum of 17k

CDCl<sub>3</sub>, 400 MHz

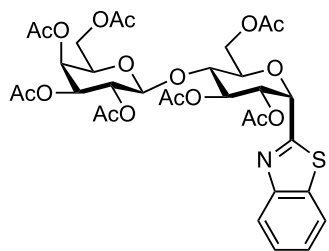

8.10  
8.08  
7.91  
7.89  
7.53  
7.51  
7.49  
7.44  
7.42  
7.40  
5.90  
5.88  
5.86  
5.54  
5.53  
5.17  
5.15  
5.14  
5.12  
5.01  
5.00  
4.98  
4.97  
4.64  
4.62  
4.28  
4.27  
4.25  
4.23  
4.10  
4.09  
3.95  
3.93  
3.92  
3.84  
3.82  
3.80  
2.13  
2.12  
2.11  
2.05  
2.00  
1.96  
1.93

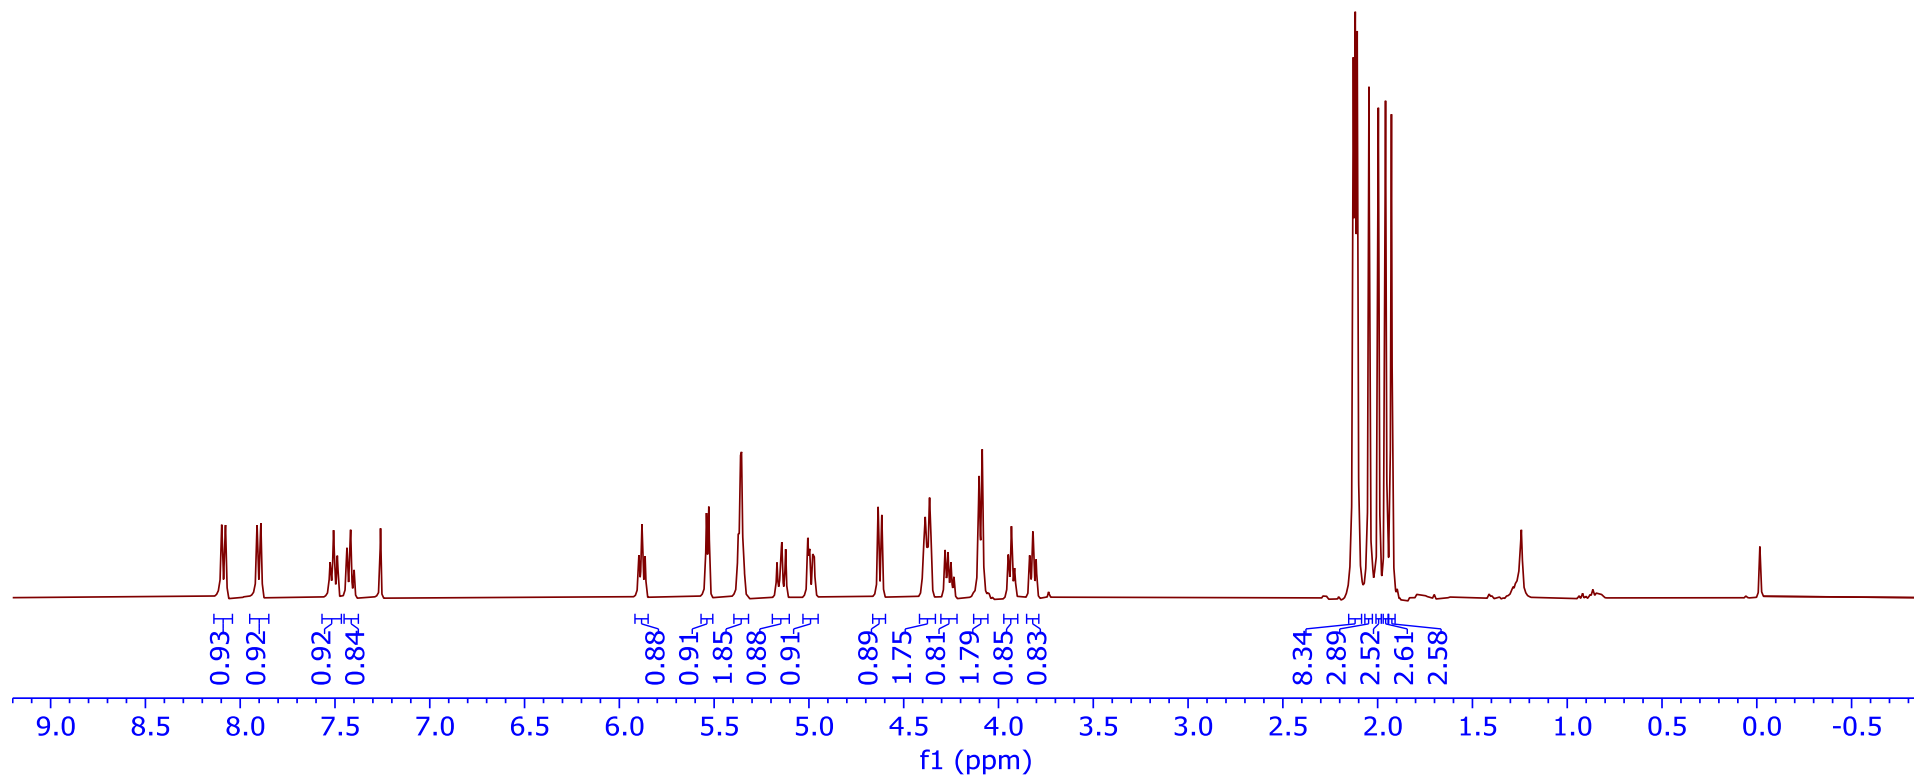

<sup>1</sup>H NMR Spectrum of 17j

CDCI3, 101 MHz

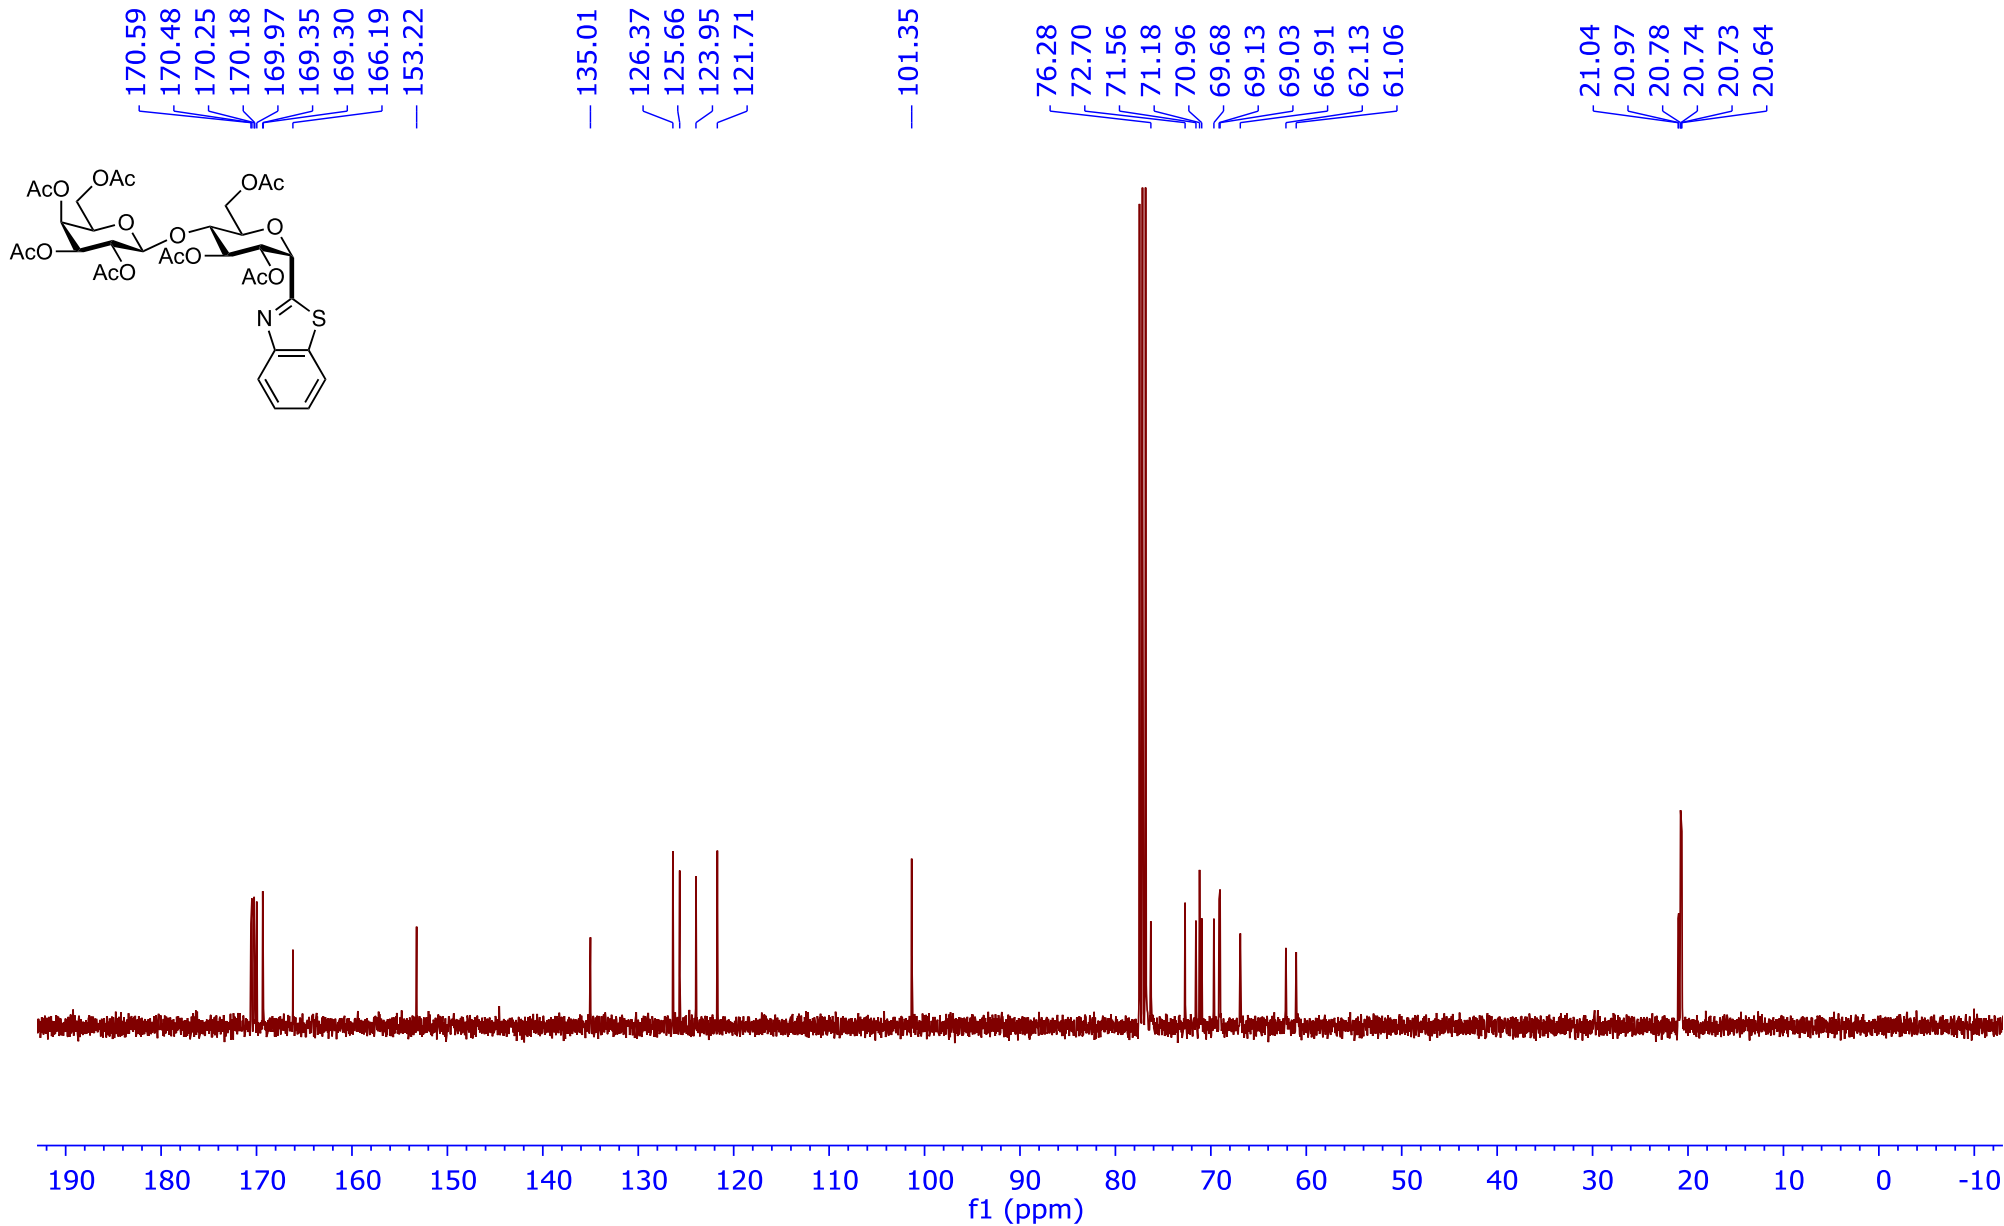

<sup>13</sup>C NMR Spectrum of 17j

CDCl<sub>3</sub>, 400 MHz

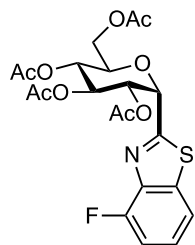

7.73  
7.71  
7.31  
7.28  
7.26  
7.24  
5.88  
5.86  
5.84  
5.69  
5.67  
5.44  
5.43  
5.42  
5.41  
5.20  
5.18  
5.16  
4.43  
4.42  
4.40  
4.38  
4.20  
4.17

2.14  
2.11  
2.02

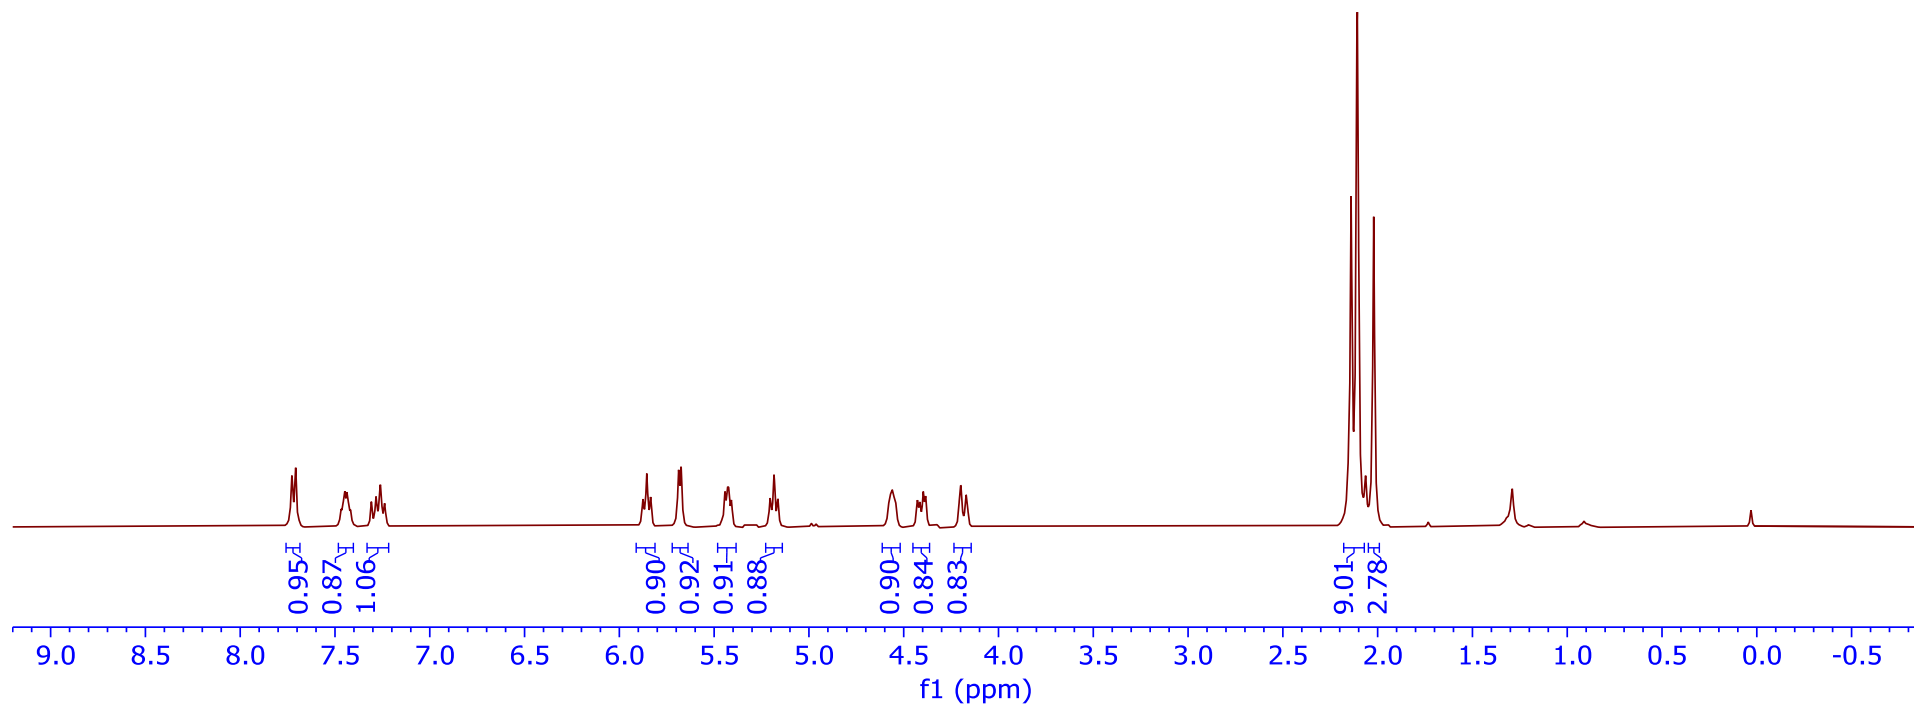

<sup>1</sup>H NMR Spectrum of 18m

CDCI3, 101 MHz

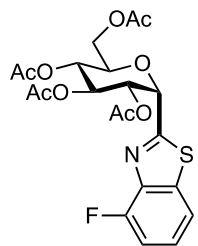

170.79  
169.88  
169.75  
169.68  
165.77  
157.50  
154.93

142.19  
142.05  
137.74  
137.71

126.80  
126.73

117.38  
117.34  
112.34  
112.16

73.44  
71.99  
71.64  
69.96  
69.88  
68.19  
61.74

20.84  
20.82  
20.78

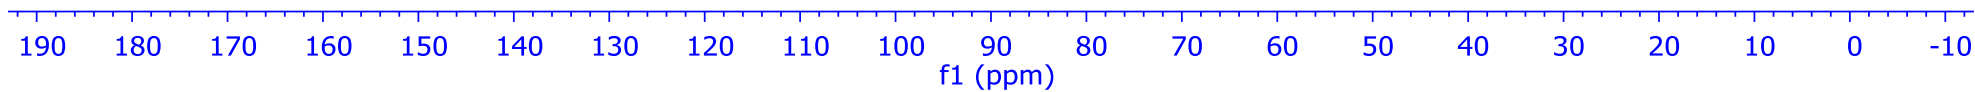

<sup>13</sup>C NMR Spectrum of 18m



CDCI3, 376 MHz

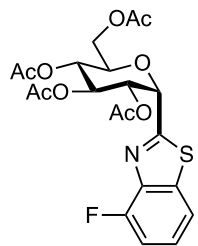

-120.48

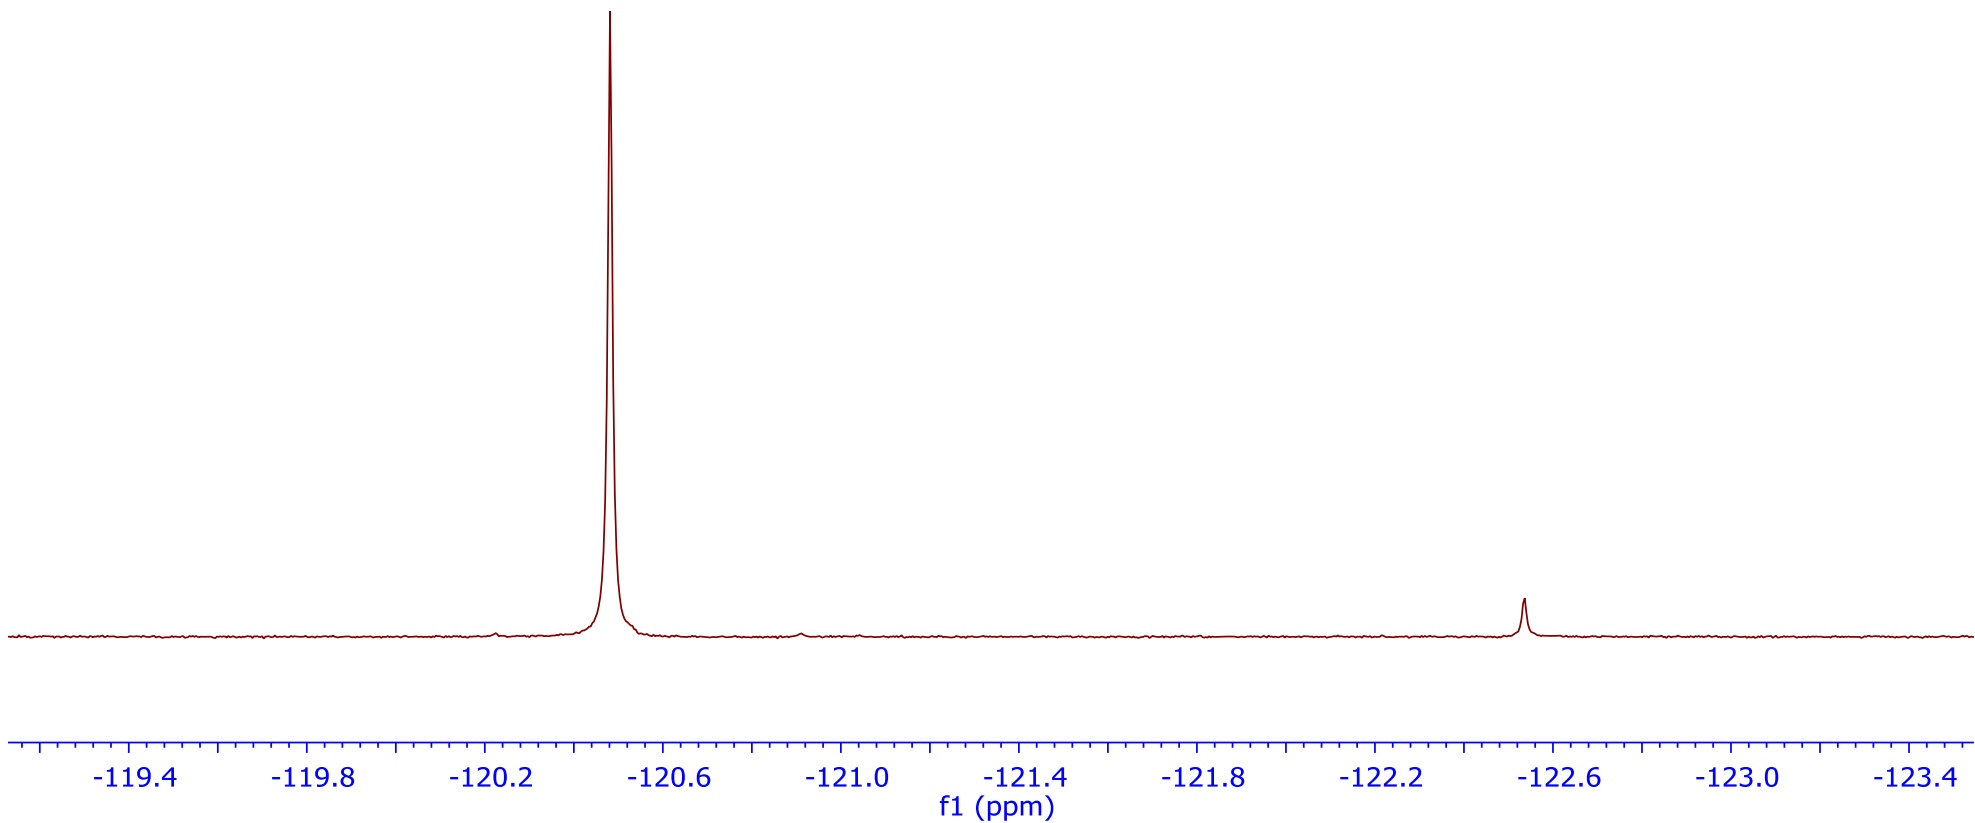

<sup>19</sup>F NMR Spectrum of 18m

CDCl<sub>3</sub>, 400 MHz

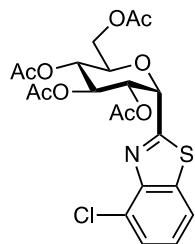

7.81  
7.79  
7.55  
7.53  
7.38  
7.36  
7.34

5.87  
5.85  
5.83  
5.65  
5.64  
5.40  
5.39  
5.37  
5.16  
5.14  
5.12  
4.38  
4.37  
4.35  
4.34  
4.16  
4.13

2.10  
2.07  
2.06  
1.98

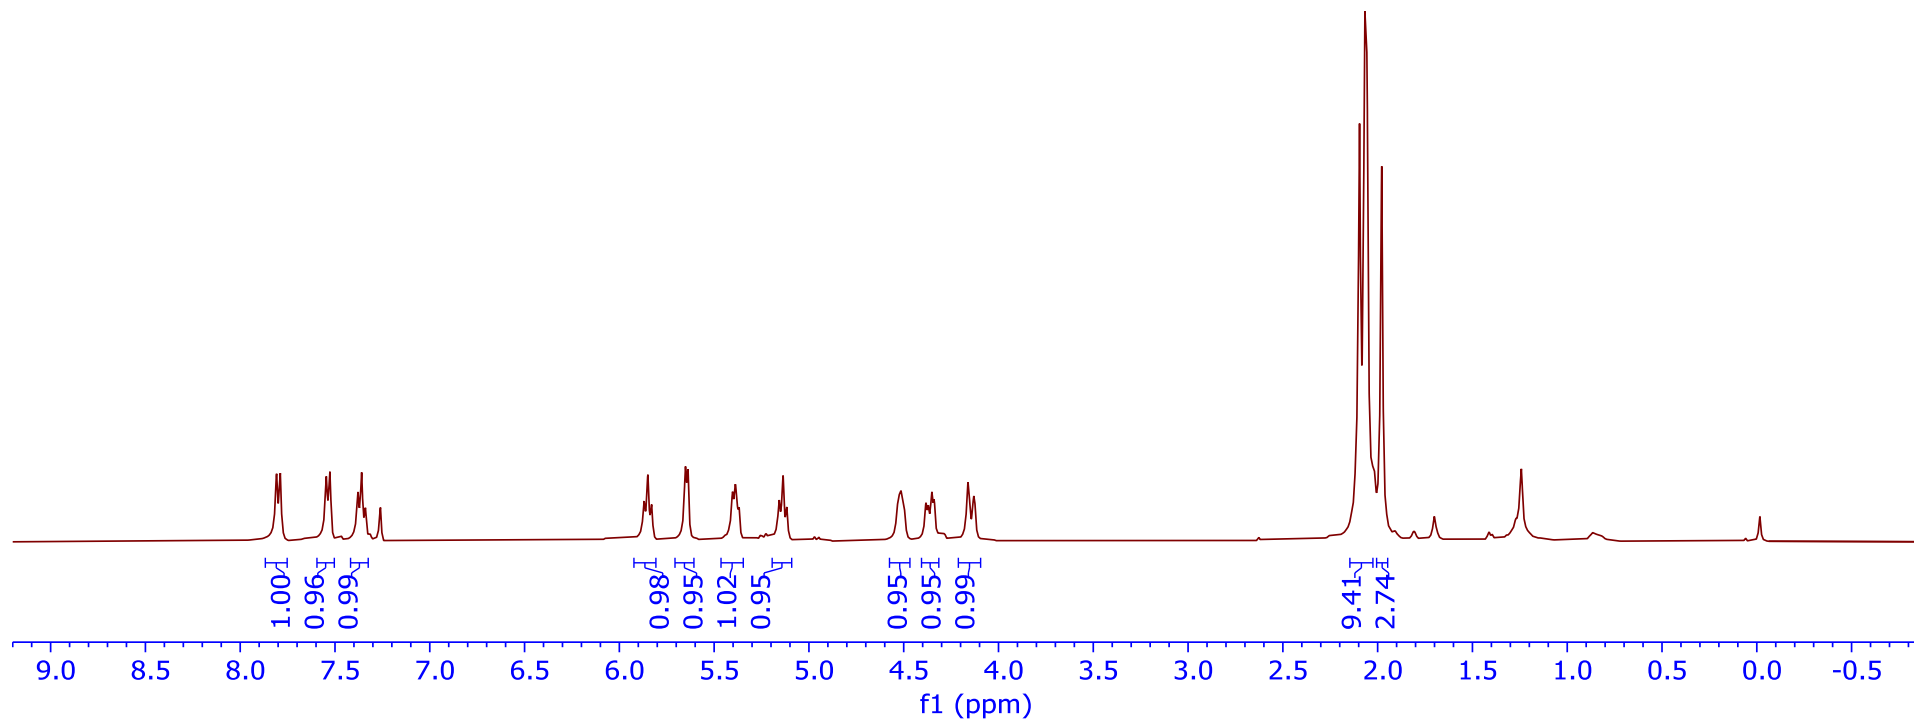

<sup>1</sup>H NMR Spectrum of 18n

CDCI3, 101 MHz

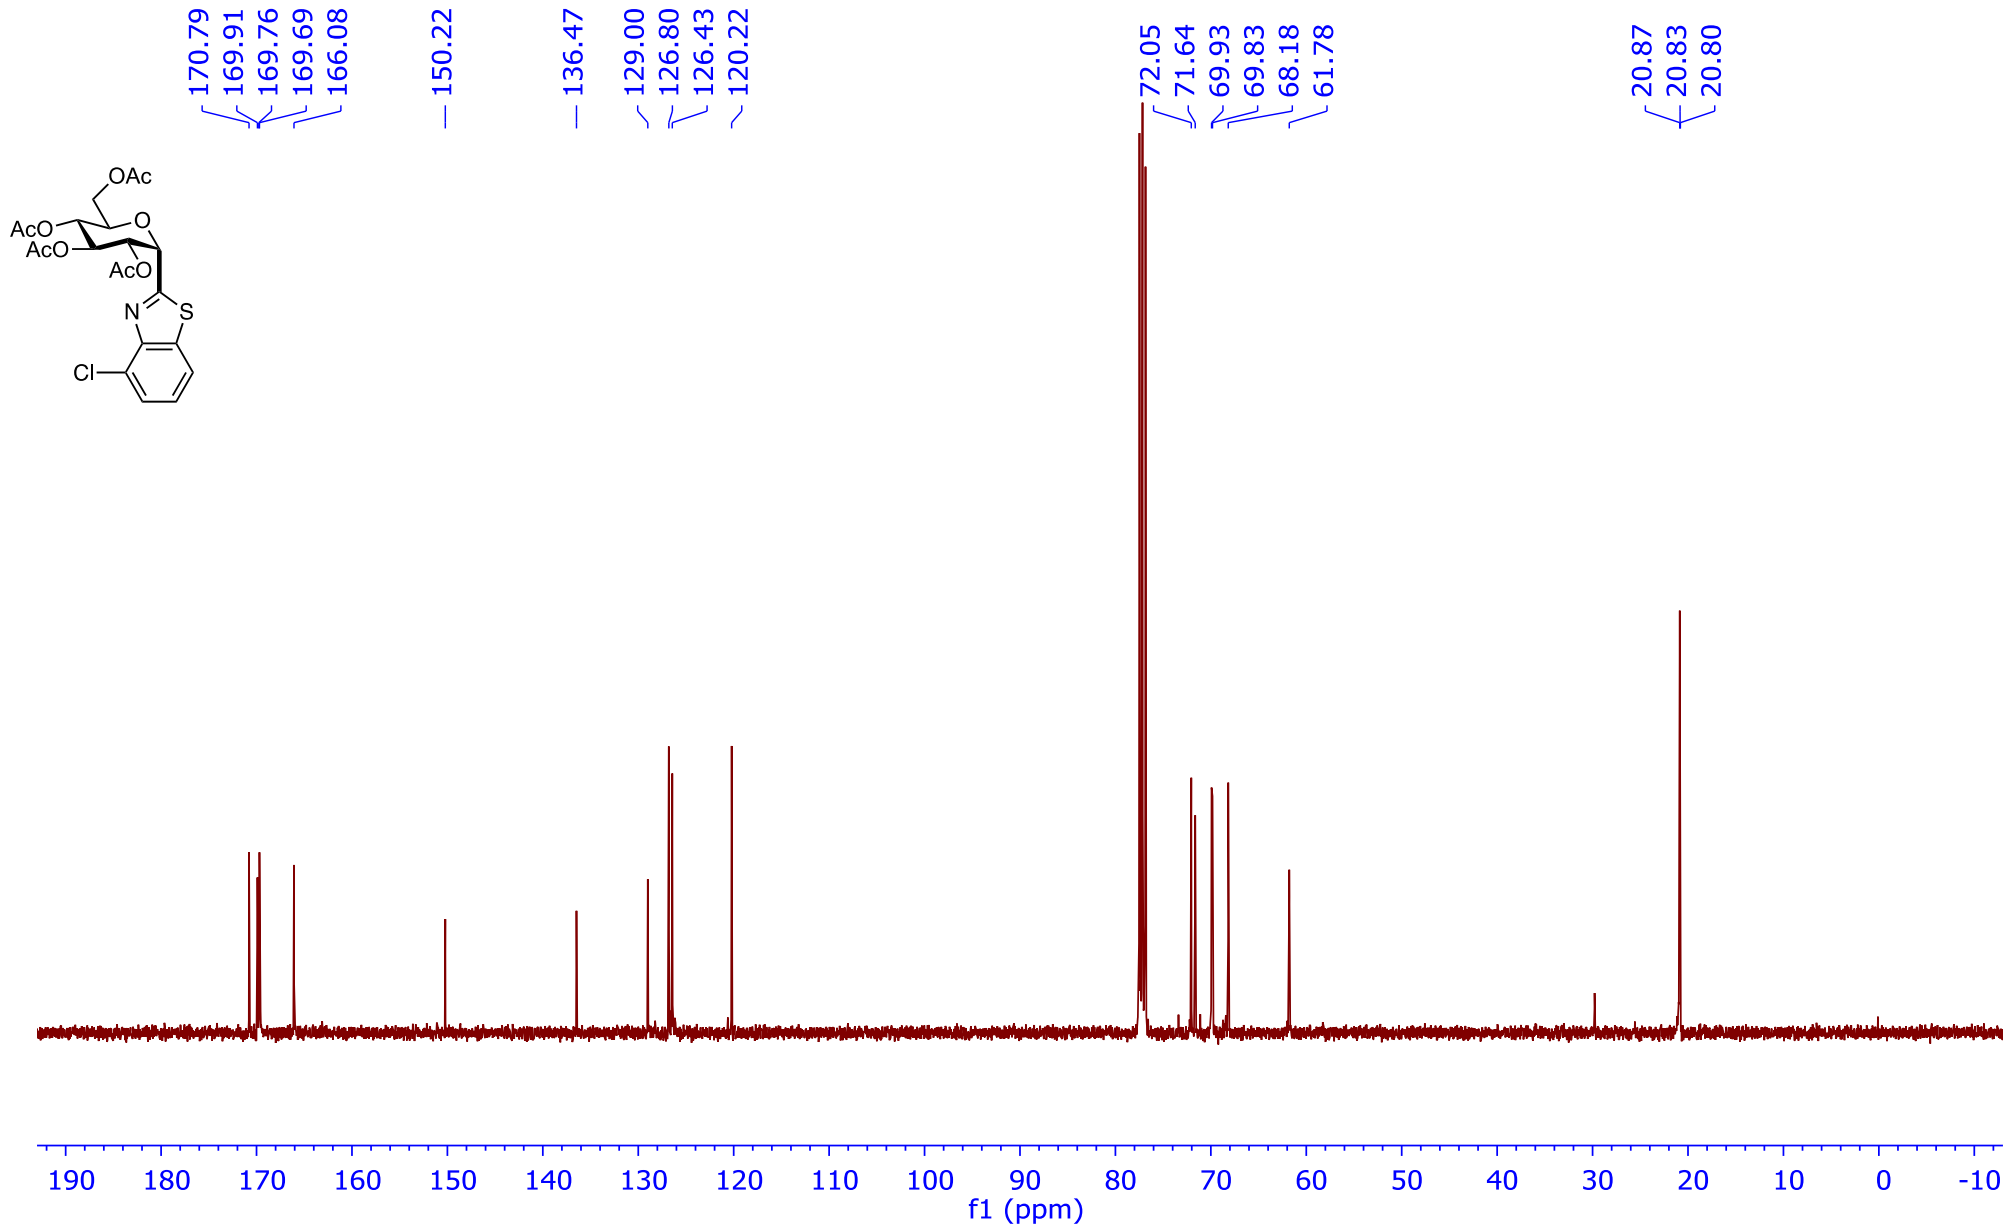

<sup>13</sup>C NMR Spectrum of 18n

CDCl<sub>3</sub>, 400 MHz

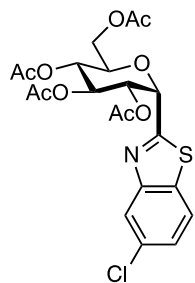

8.15  
7.83  
7.81  
7.42  
7.40

5.98  
5.96  
5.94  
5.59  
5.58  
5.38  
5.36  
5.35  
5.17  
5.15  
5.13  
4.34  
4.33  
4.31  
4.09  
4.06

2.07  
2.05  
1.93

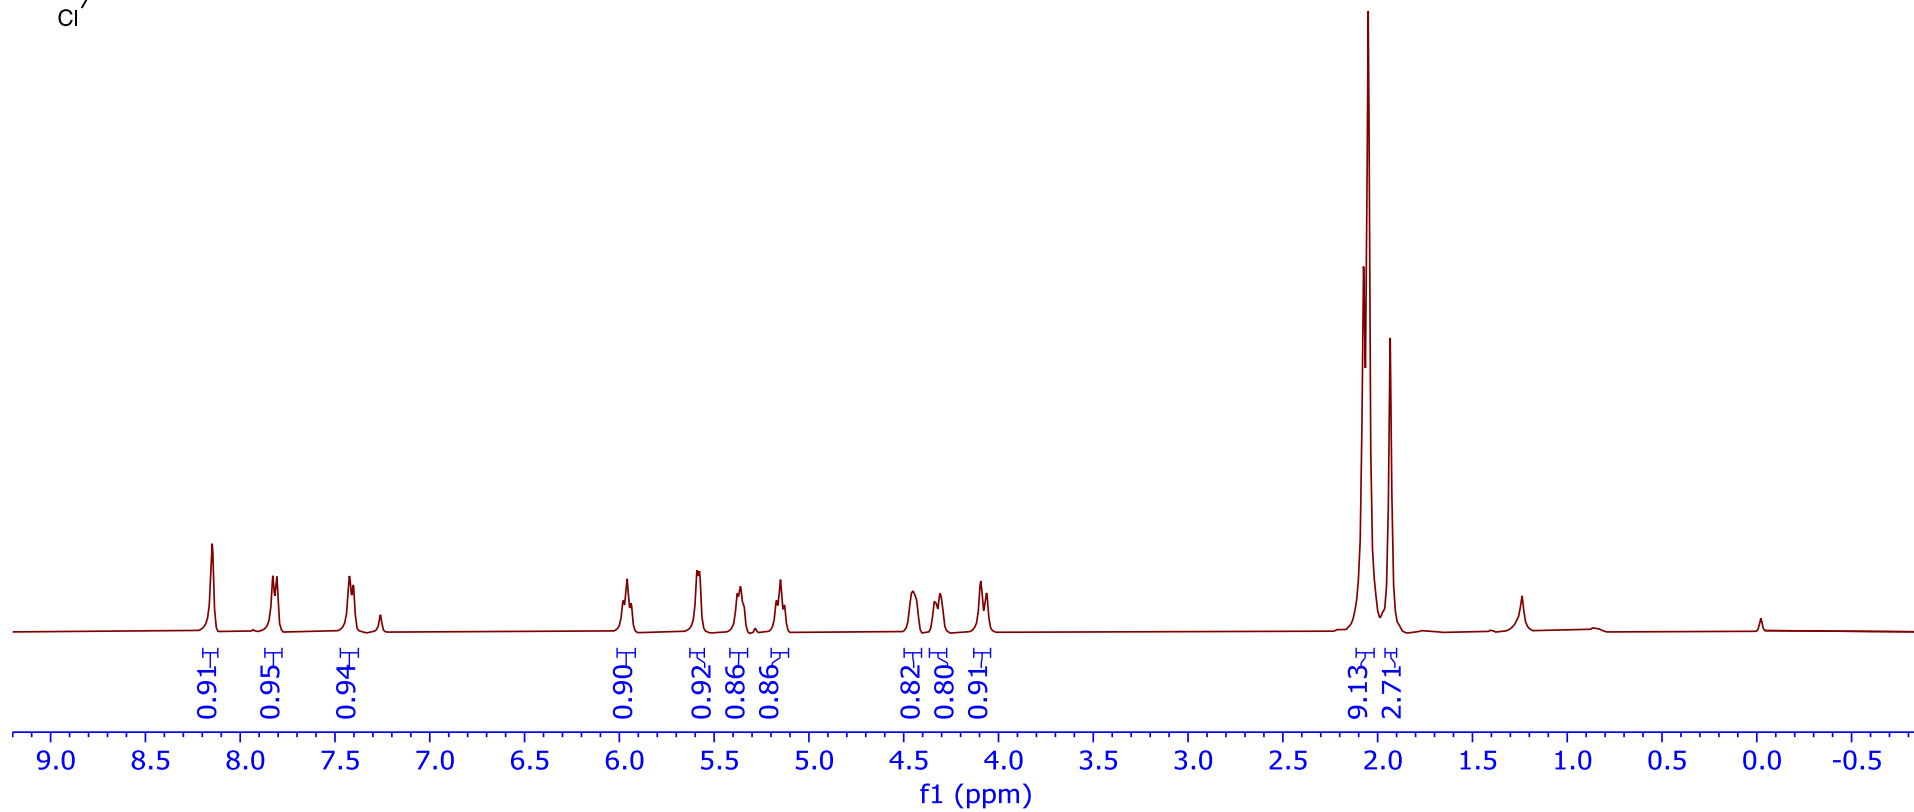

<sup>1</sup>H NMR Spectrum of 18o

CDCI3, 101 MHz

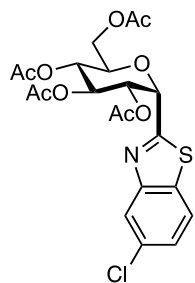

170.73  
169.95  
169.88  
169.72  
166.65

154.03

133.29  
132.67  
126.52  
124.04  
122.45

71.63  
71.60  
70.14  
70.06  
68.44  
61.77

20.84  
20.79  
20.73



<sup>13</sup>C NMR Spectrum of 180  
S53

CDCl<sub>3</sub>, 400 MHz

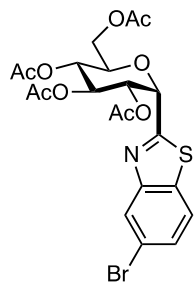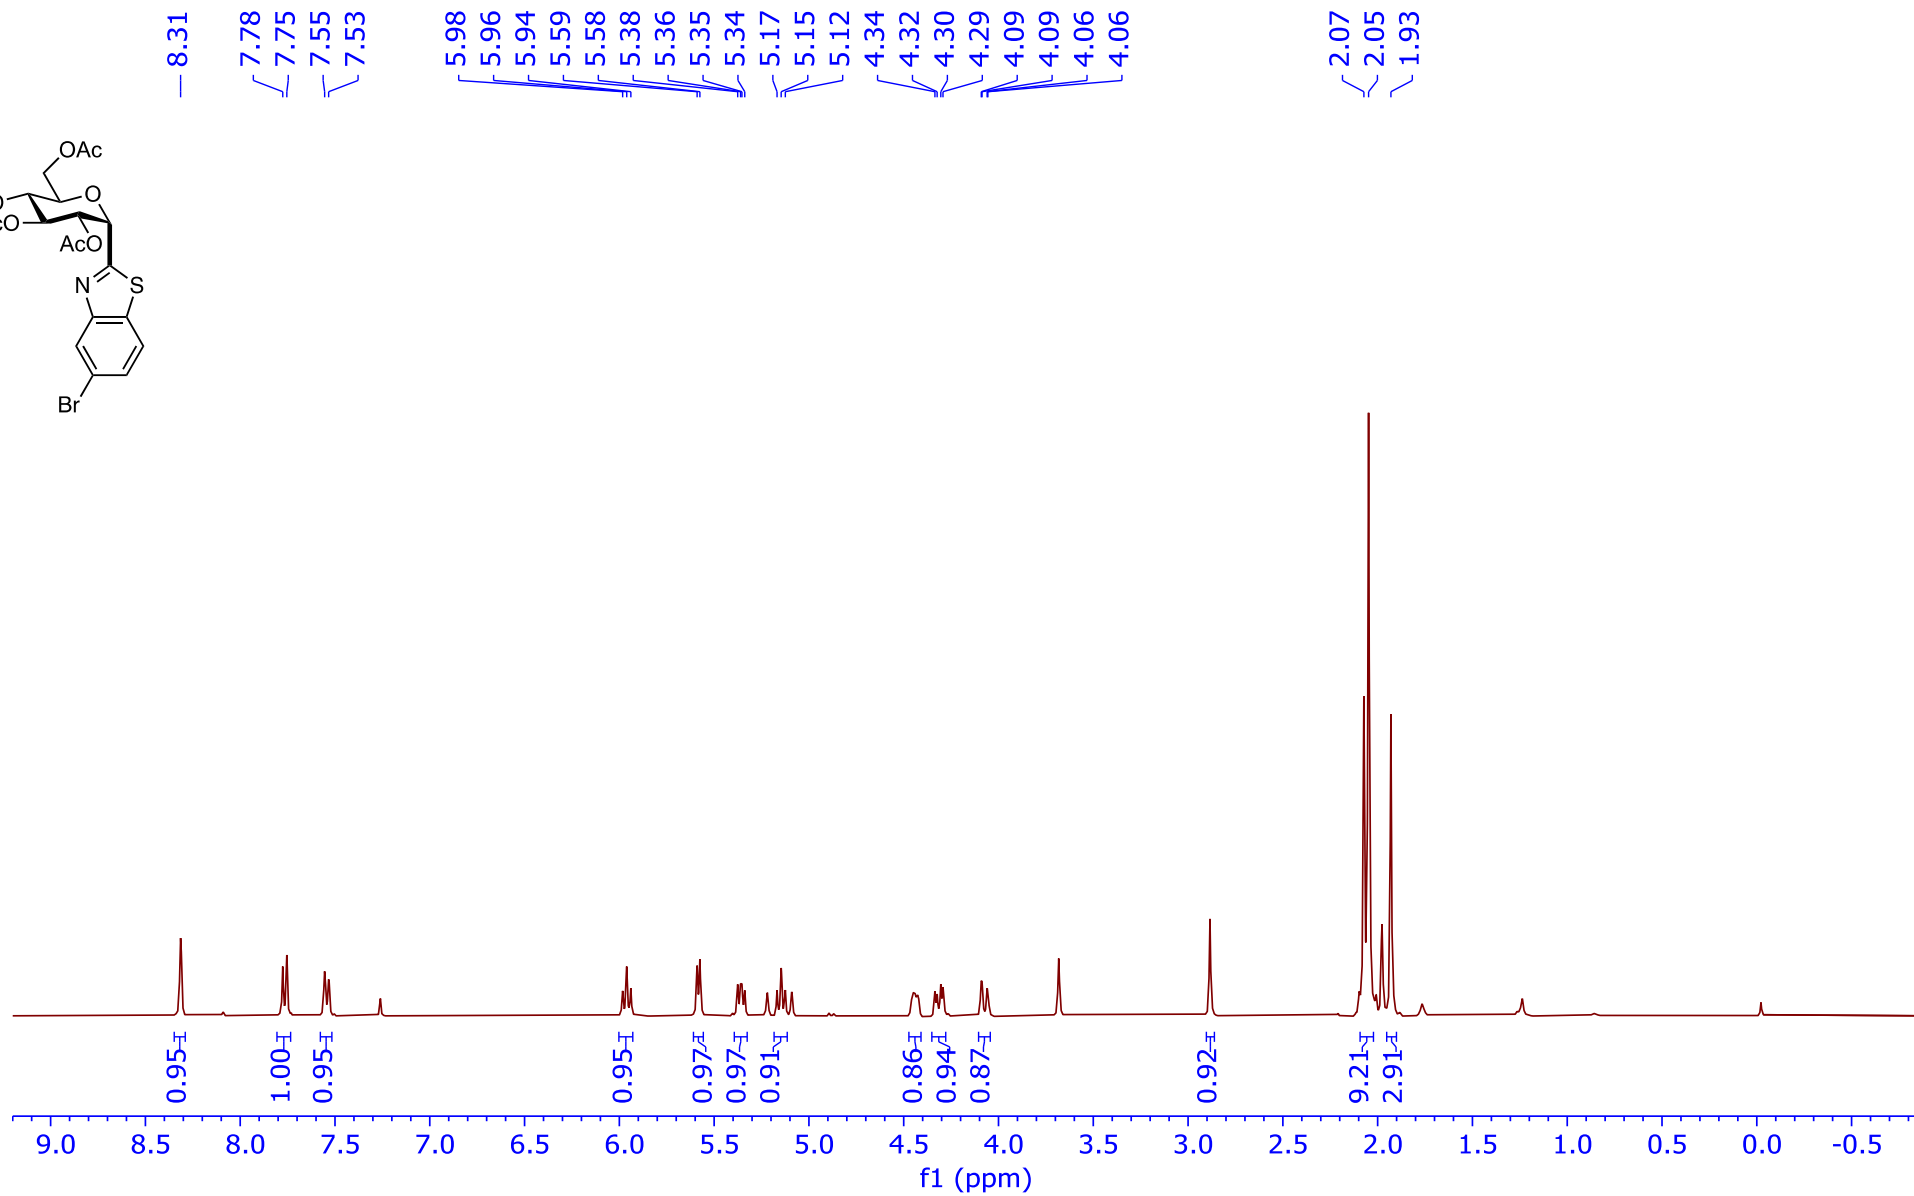

<sup>1</sup>H NMR Spectrum of 18p

CDCI3, 101 MHz

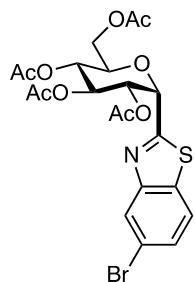

170.73  
169.94  
169.87  
169.72  
166.44  
— 154.33

133.83  
129.12  
127.10  
122.77  
120.19

71.59  
70.12  
70.05  
68.43  
61.77

20.83  
20.79  
20.72



<sup>13</sup>C NMR Spectrum of 18p  
S55

CDCl<sub>3</sub>, 400 MHz

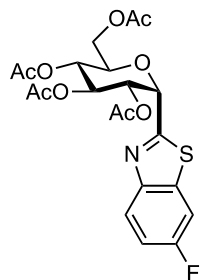

8.12  
8.11  
8.10  
8.09  
7.60  
7.60  
7.59  
7.58

6.01  
5.99  
5.97  
5.60  
5.59  
5.40  
5.38  
5.37  
5.36  
5.19  
5.17  
5.15  
4.36  
4.35  
4.33  
4.32  
4.11  
4.11  
4.08  
4.08

2.10  
2.07  
1.96

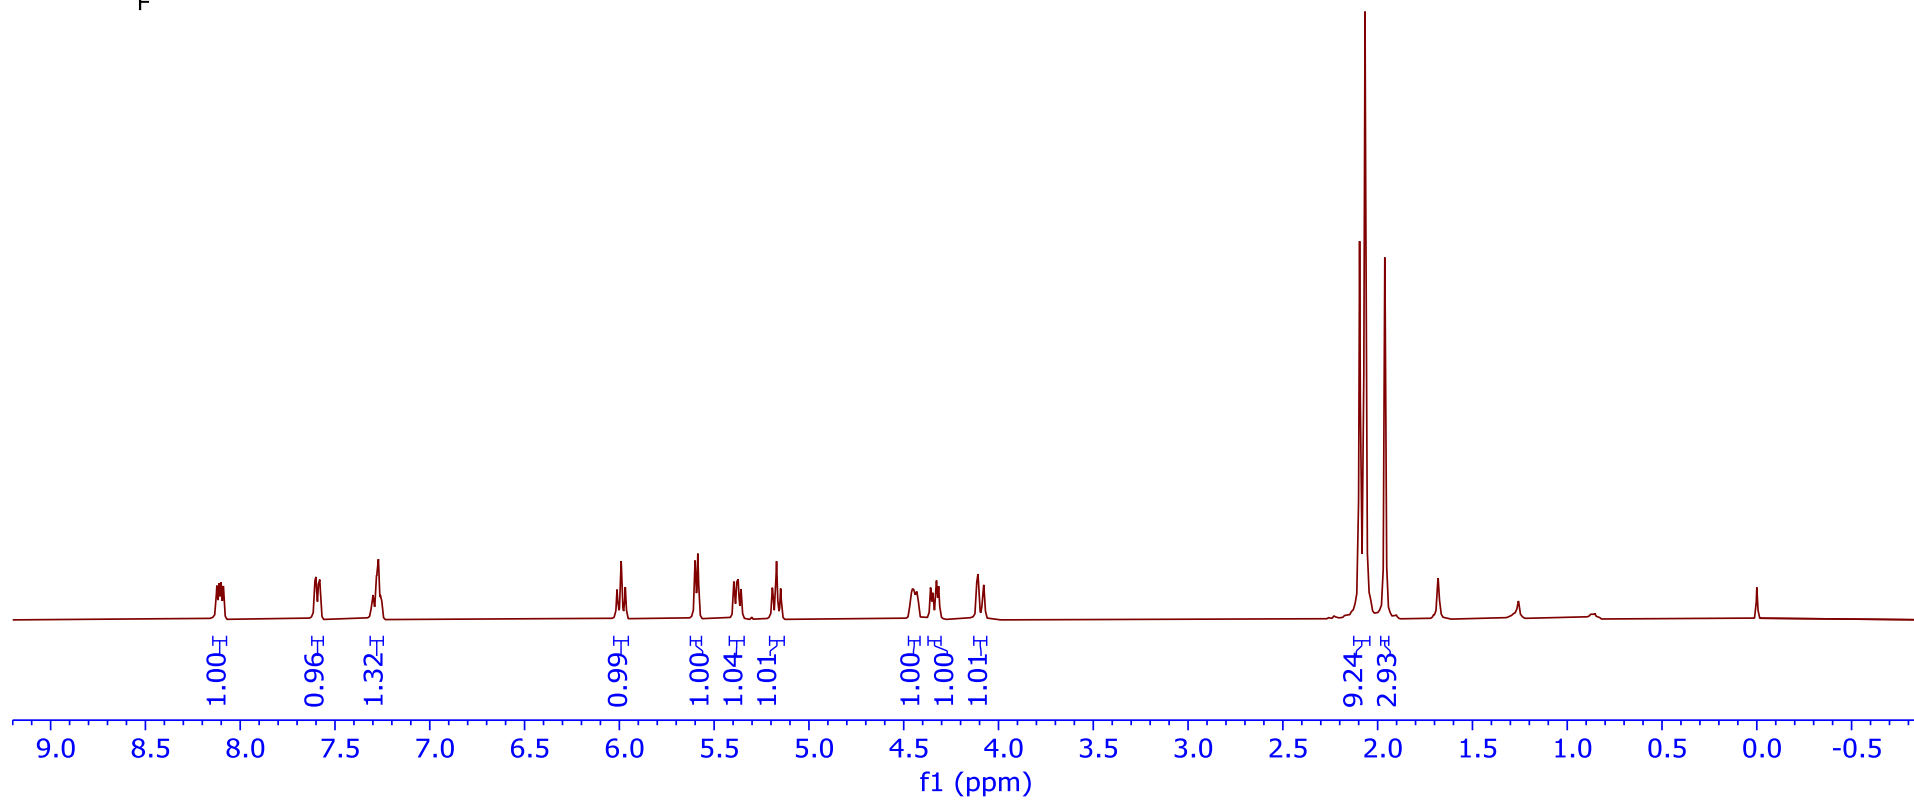

<sup>1</sup>H NMR Spectrum of 18q



CDCI3, 101 MHz

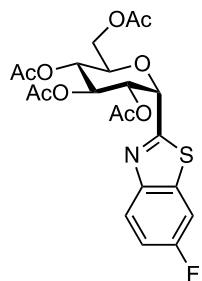

170.80  
170.02  
169.77  
164.29  
164.26  
162.18  
159.73  
149.91  
149.90

136.23  
136.11

125.36  
125.26

115.50  
115.26  
108.00  
107.74

71.66  
71.52  
70.28  
70.13  
68.53  
61.81

20.89  
20.87  
20.83  
20.79

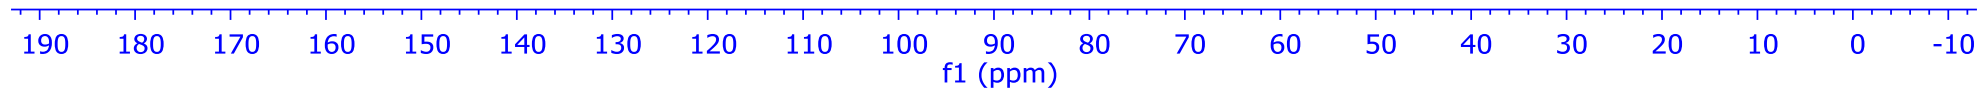

<sup>13</sup>C NMR Spectrum of 18q

CDCI3, 376 MHz

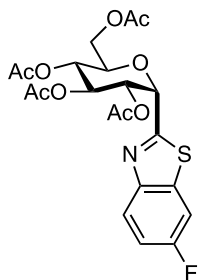

-114.68

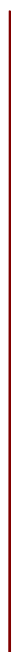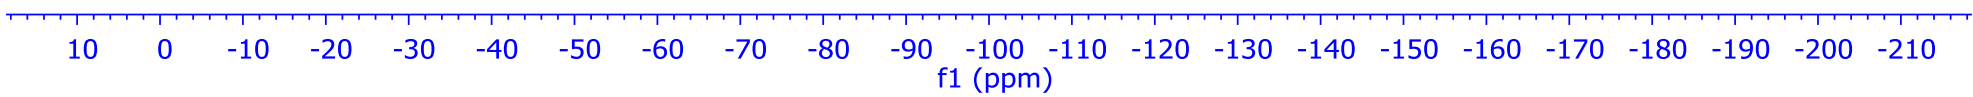

<sup>19</sup>F NMR Spectrum of 18q  
S58

CDCl<sub>3</sub>, 400 MHz

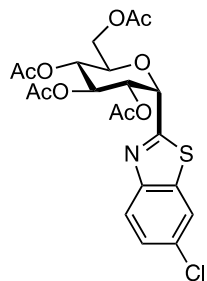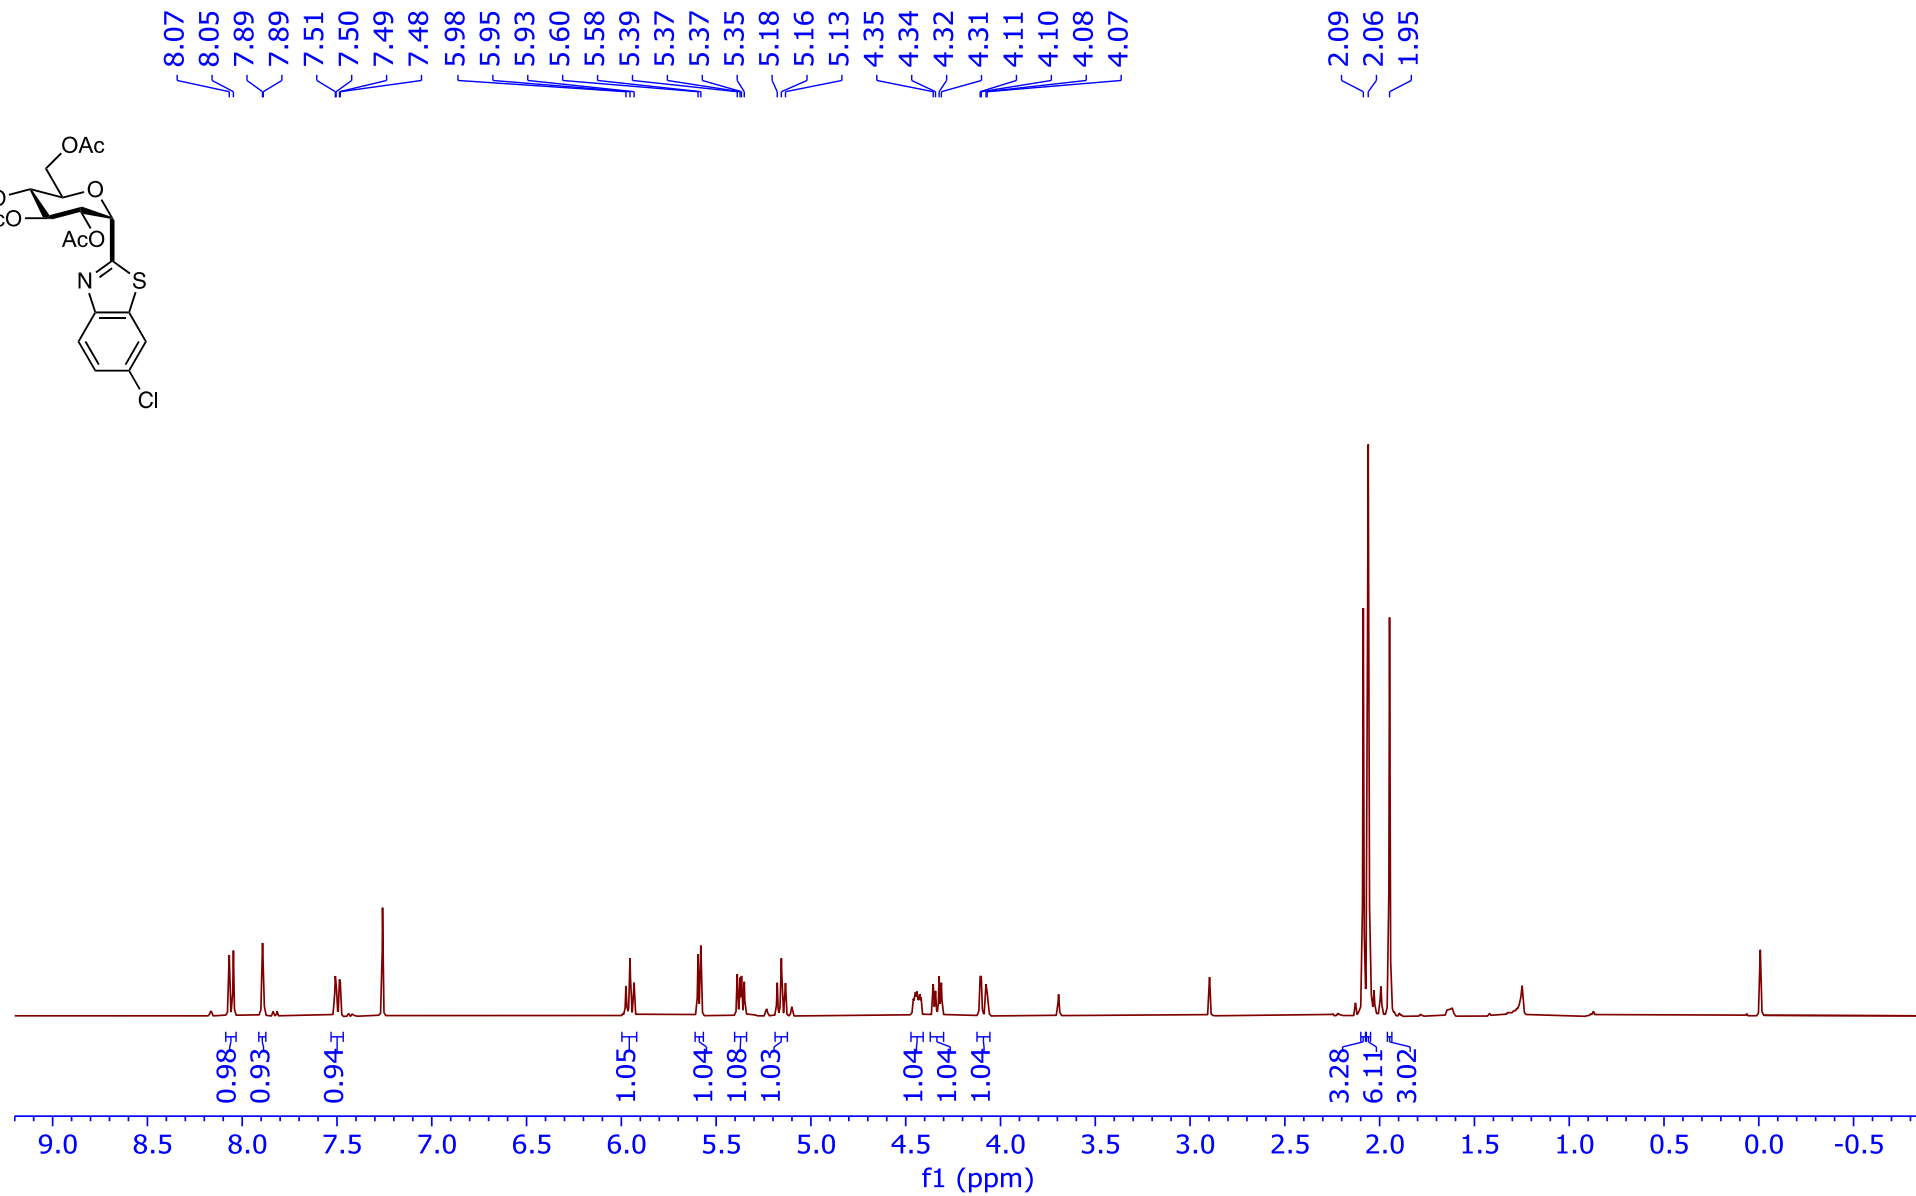

<sup>1</sup>H NMR Spectrum of 18r

CDCI3, 101 MHz

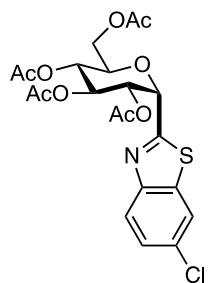

170.79  
170.00  
169.98  
169.76

151.80

136.30

132.10

127.43

125.01

121.36

71.64

70.21

70.08

68.48

61.78

20.89

20.84

20.79



<sup>13</sup>C NMR Spectrum of 18r  
S60

CDCl<sub>3</sub>, 400 MHz

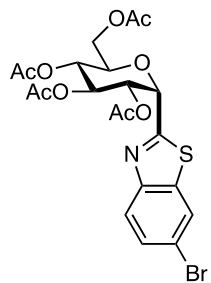

8.05  
8.01  
7.98  
7.64  
7.62

5.97  
5.94  
5.92  
5.59  
5.57  
5.38  
5.37  
5.36  
5.35  
5.17  
5.15  
5.13  
4.35  
4.34  
4.32  
4.31  
4.10  
4.07

2.08  
2.05  
1.94

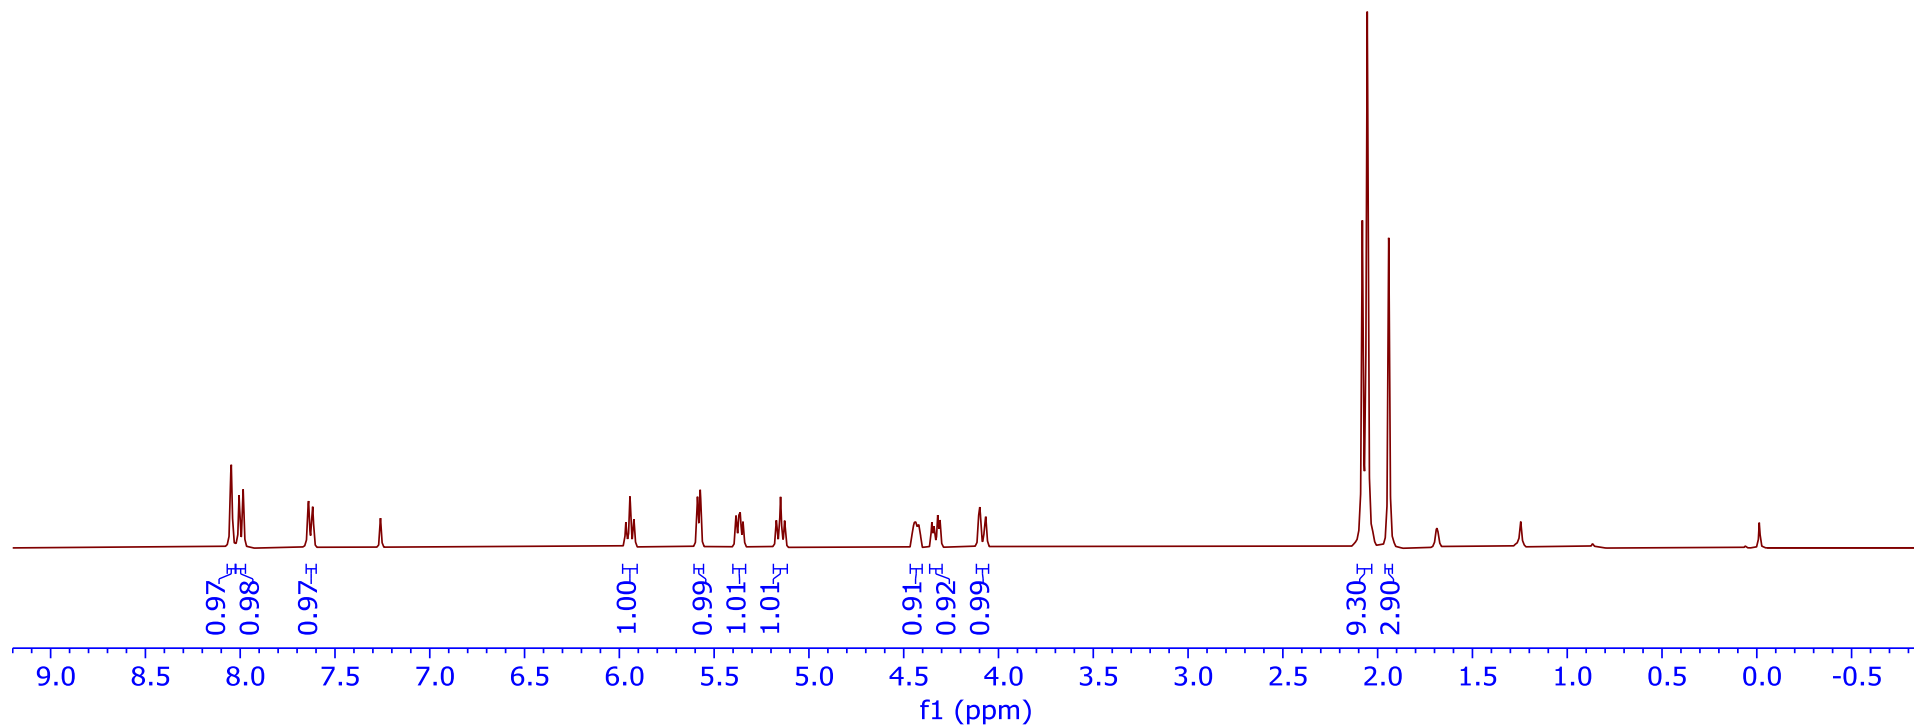

<sup>1</sup>H NMR Spectrum of 18s

CDCI3, 101 MHz

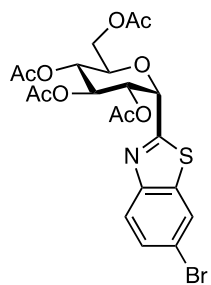

170.77  
169.97  
169.95  
169.74  
165.30

152.10

136.74  
130.10  
125.32  
124.30  
119.77

71.64  
71.60  
70.17  
70.05  
68.44  
61.76

20.87  
20.86  
20.82  
20.76



<sup>13</sup>C NMR Spectrum of 18s

CDCl<sub>3</sub>, 400 MHz

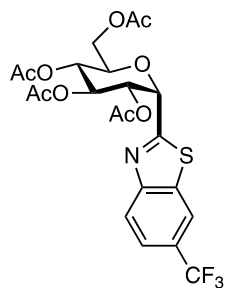

8.21  
7.77  
7.75

5.93  
5.91  
5.89  
5.64  
5.63  
5.41  
5.39  
5.39  
5.37  
5.17  
5.15  
5.13  
4.38  
4.36  
4.34  
4.33  
4.11  
4.11  
4.08  
4.08

2.08  
2.06  
2.05  
1.94

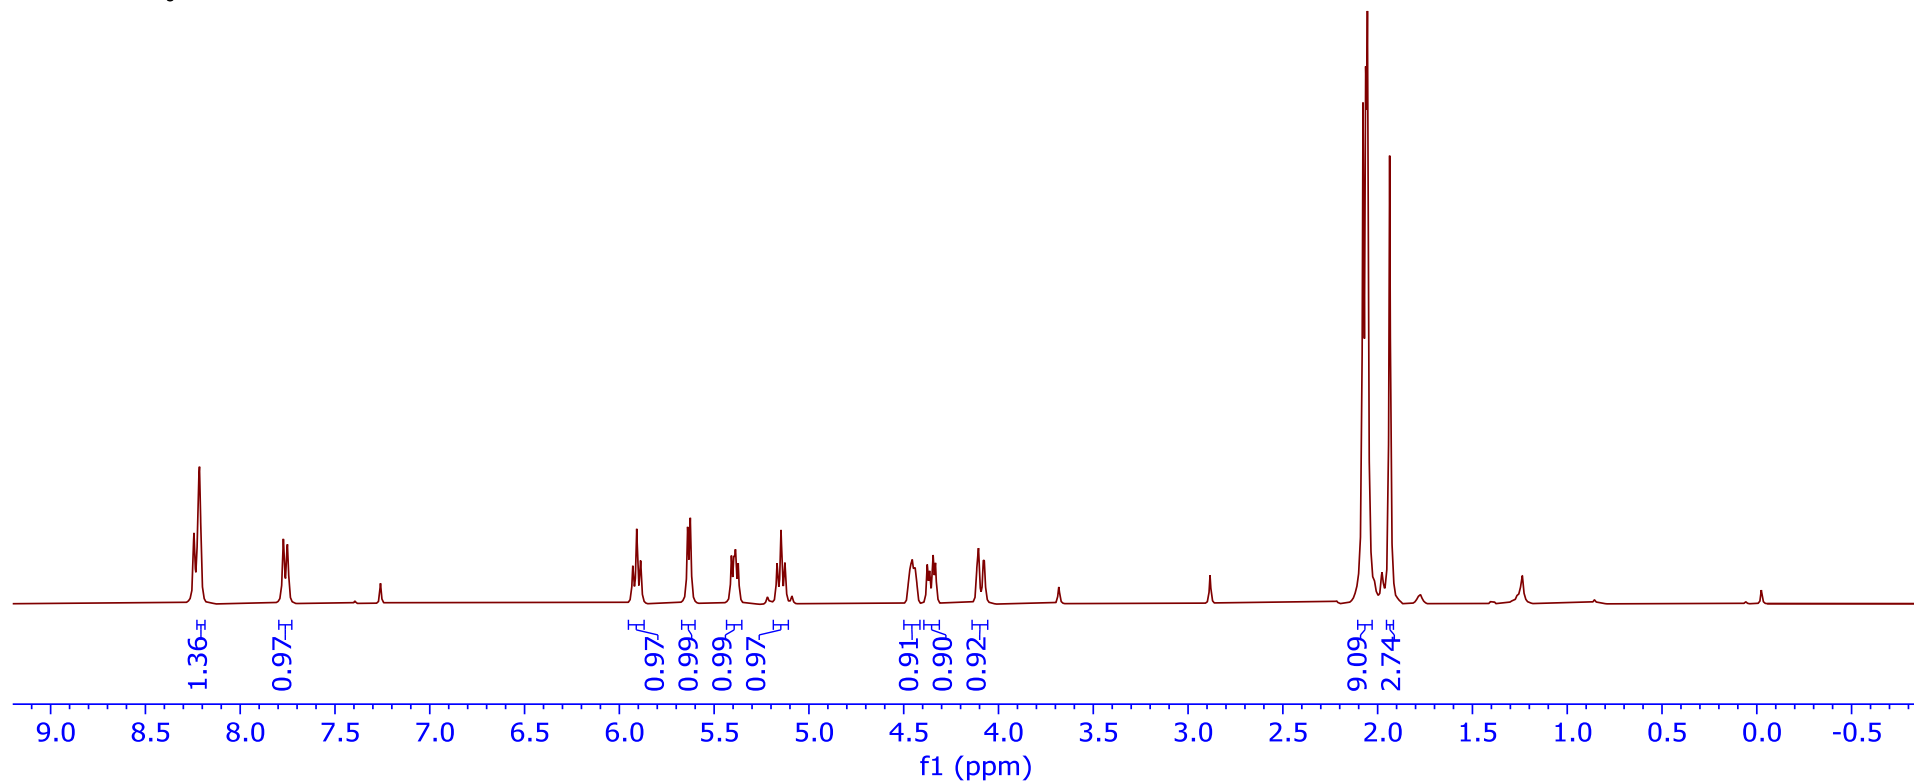

<sup>1</sup>H NMR Spectrum of 18t

CDCI3, 101 MHz

170.73  
169.88  
169.85  
169.69  
168.39  
— 155.08

— 135.16  
124.61  
123.49  
123.46  
119.54  
119.49

71.88  
71.62  
69.98  
69.92  
68.30  
61.67

20.82  
20.80  
20.79  
20.70

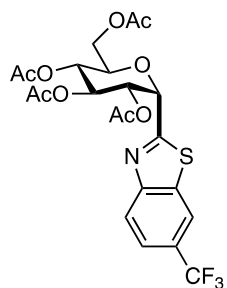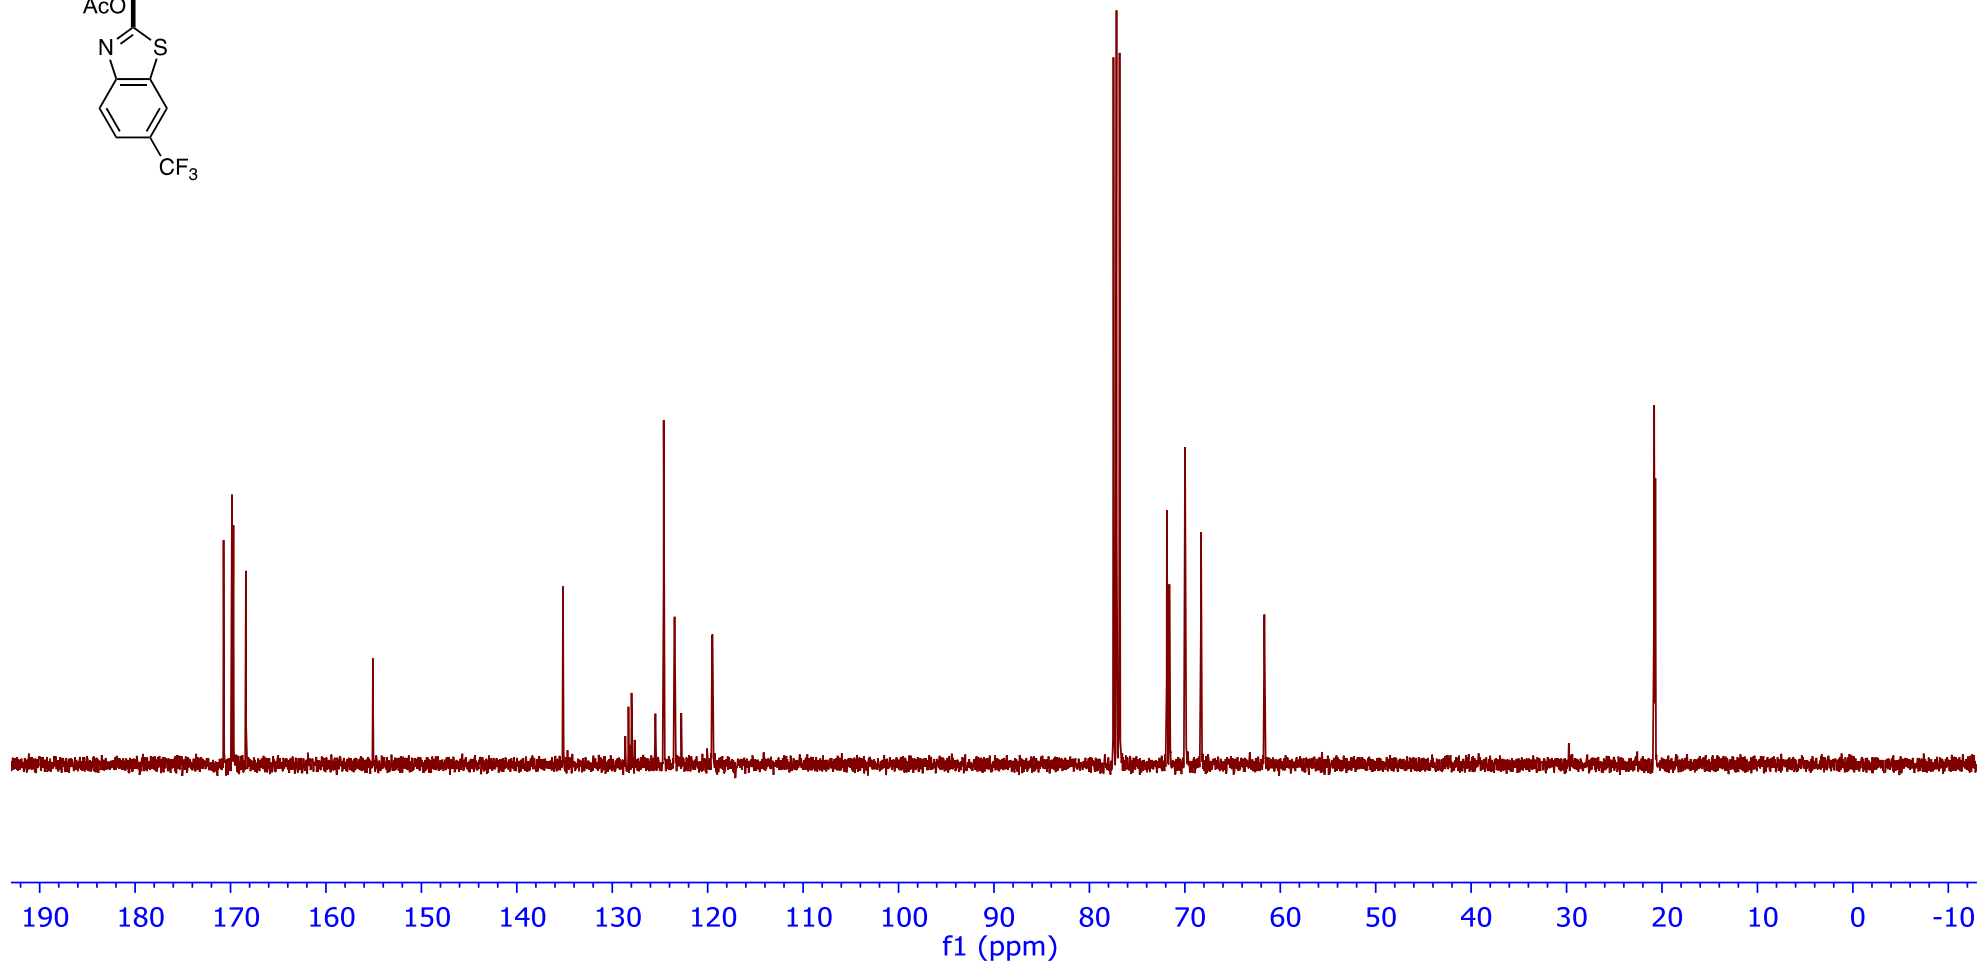

<sup>13</sup>C NMR Spectrum of 18t  
S64



CDCI3, 376 MHz

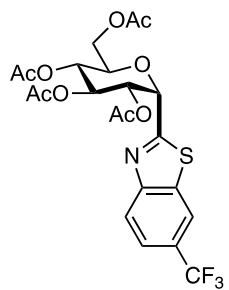

-61.53

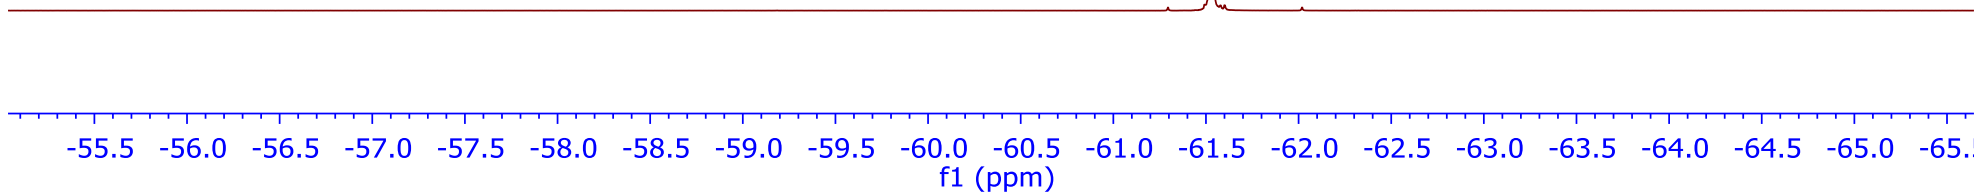

<sup>19</sup>F NMR Spectrum of 18t  
S65

CDCl<sub>3</sub>, 400 MHz

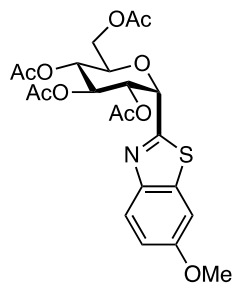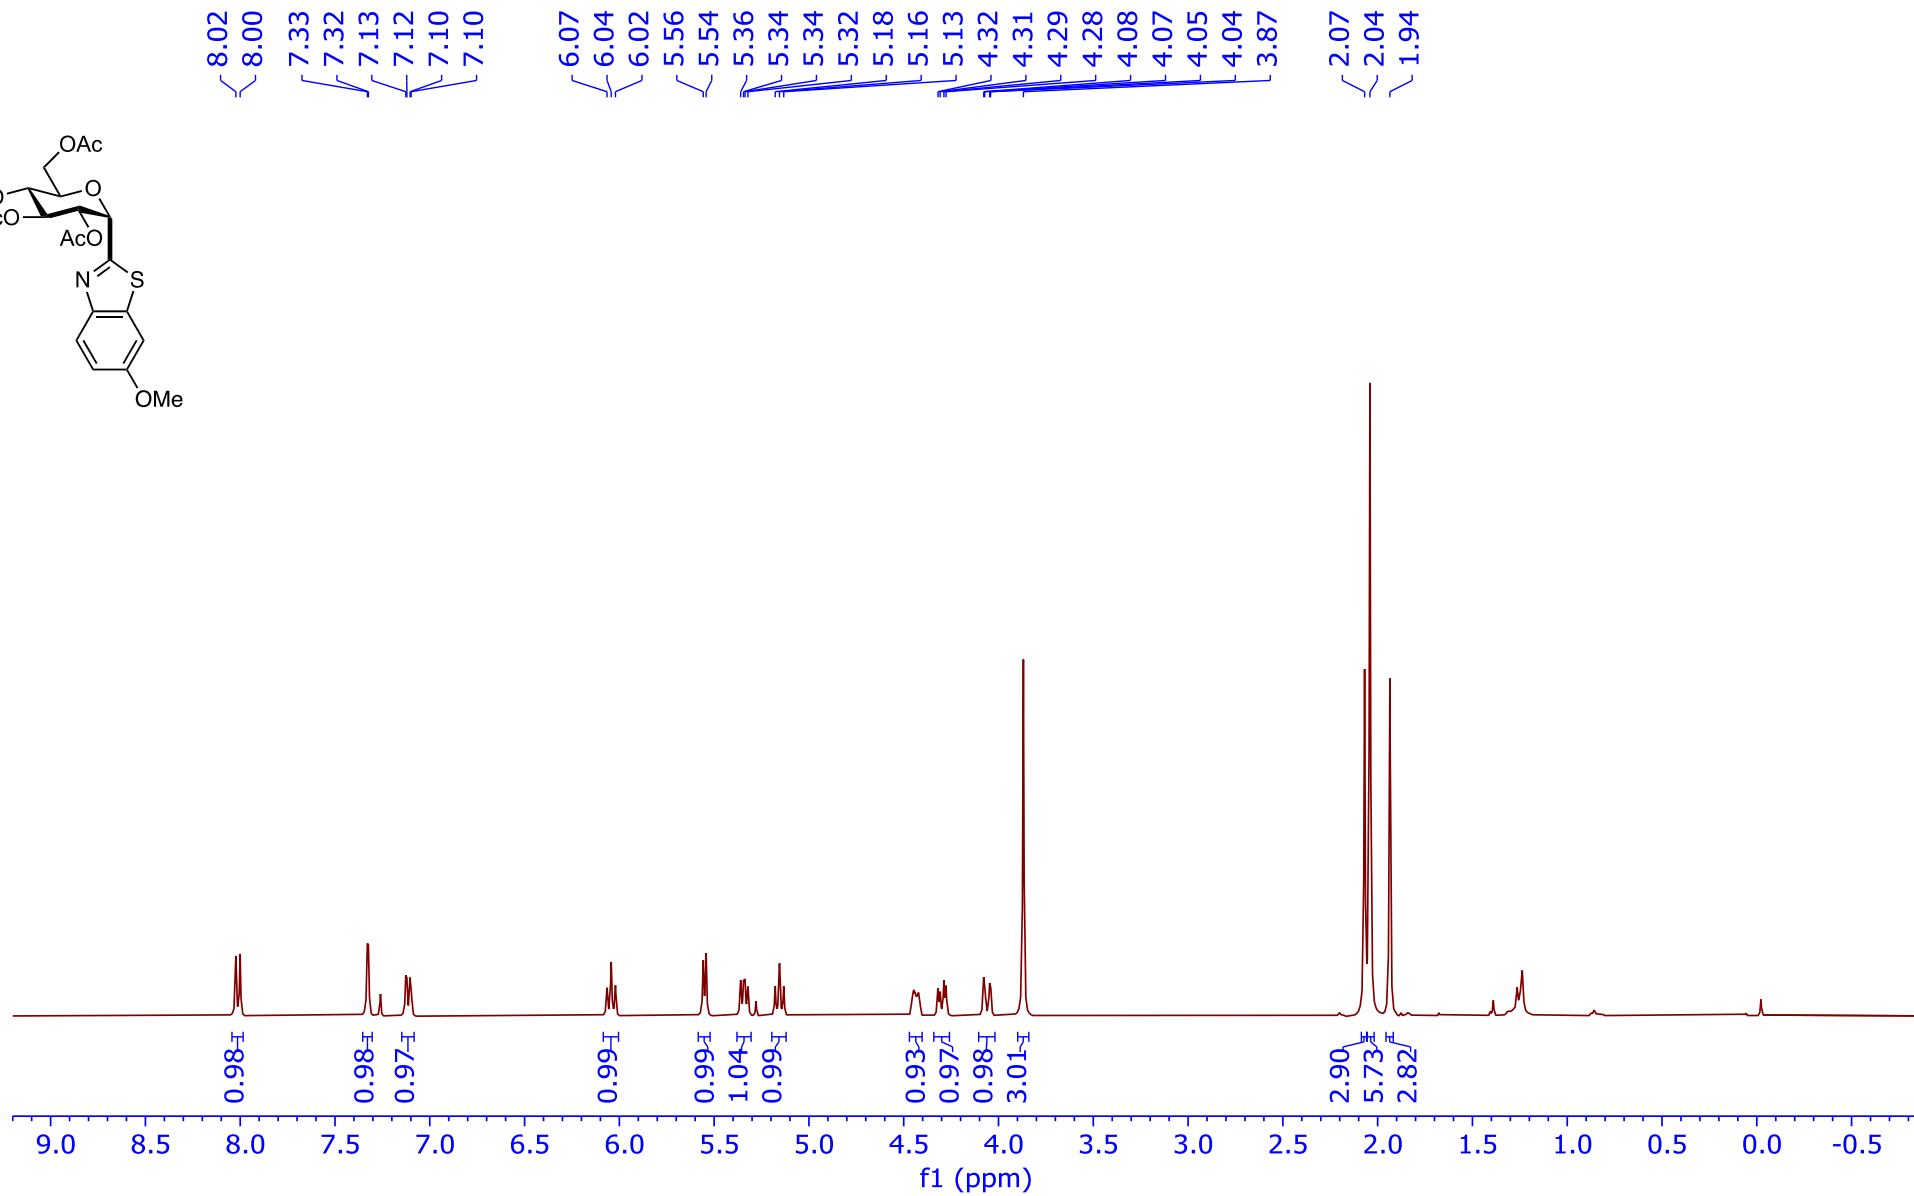

<sup>1</sup>H NMR Spectrum of 18u

CDCI3, 101 MHz

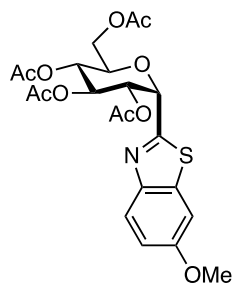

170.76  
170.07  
170.02  
169.77  
161.37  
158.28

147.80

136.55

124.73

116.07

103.83

71.64

71.17

70.44

70.25

68.65

61.86

55.91

55.90

20.85

20.82

20.78

20.76



<sup>13</sup>C NMR Spectrum of 18u  
S67

CDCl<sub>3</sub>, 400 MHz

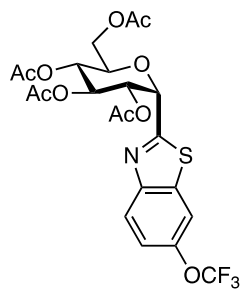

8.15  
8.12  
7.77  
7.40  
7.38

5.96  
5.94  
5.92  
5.60  
5.59  
5.38  
5.37  
5.36  
5.35  
5.17  
5.14  
5.12  
4.35  
4.34  
4.32  
4.31  
4.09  
4.09  
4.06  
4.05

2.07  
2.05  
2.04  
1.94

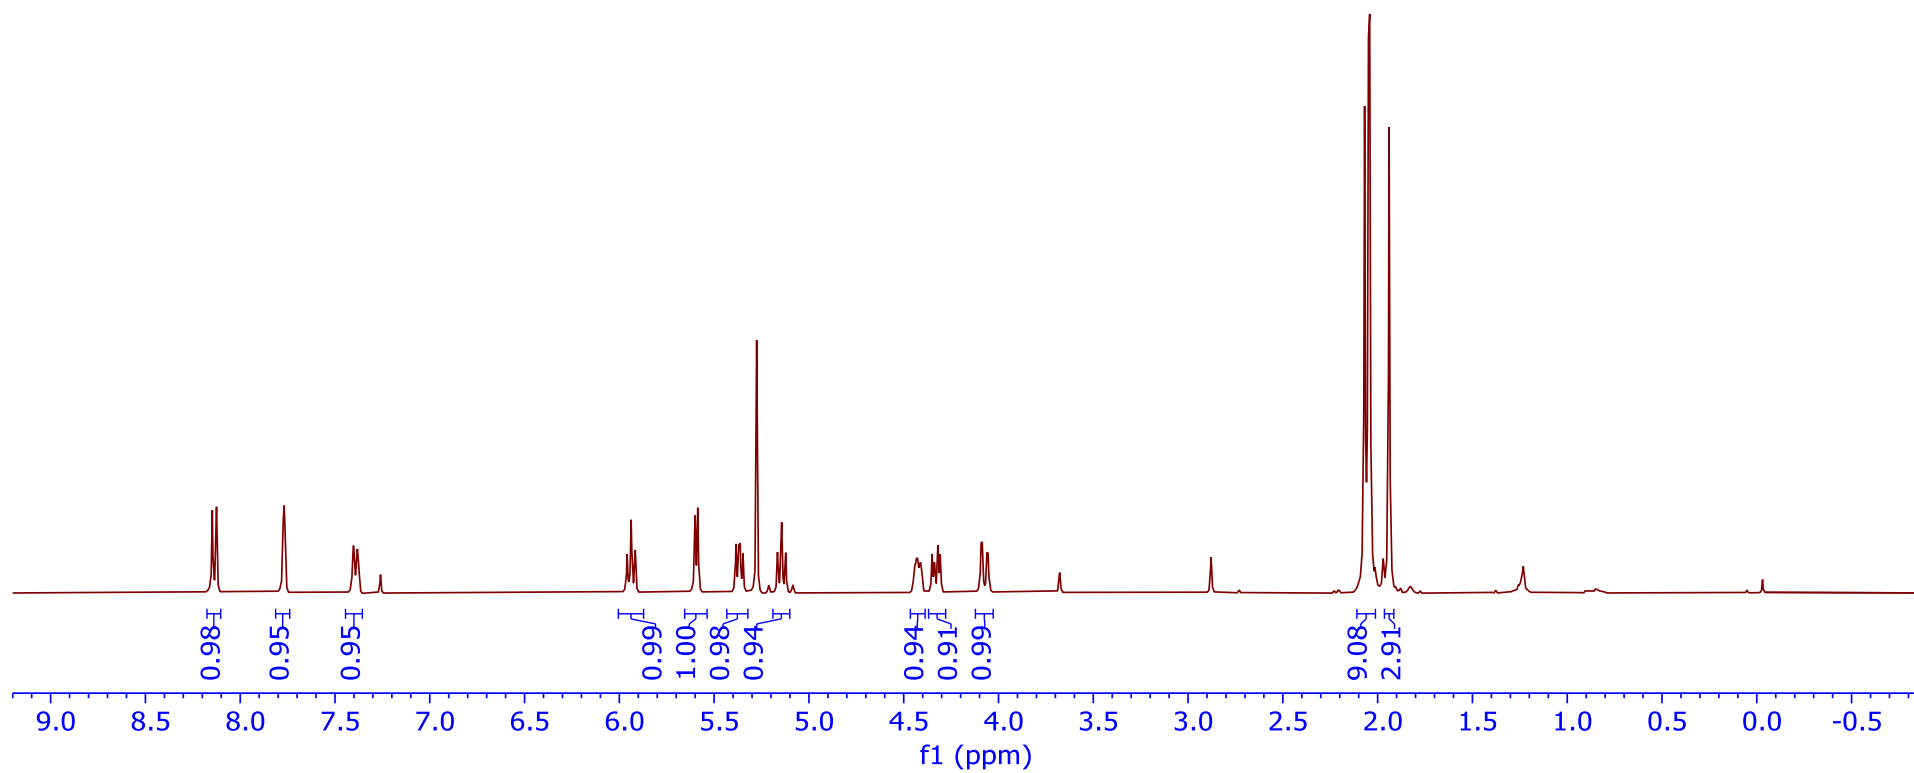

<sup>1</sup>H NMR Spectrum of 18v

CDCI3, 101 MHz

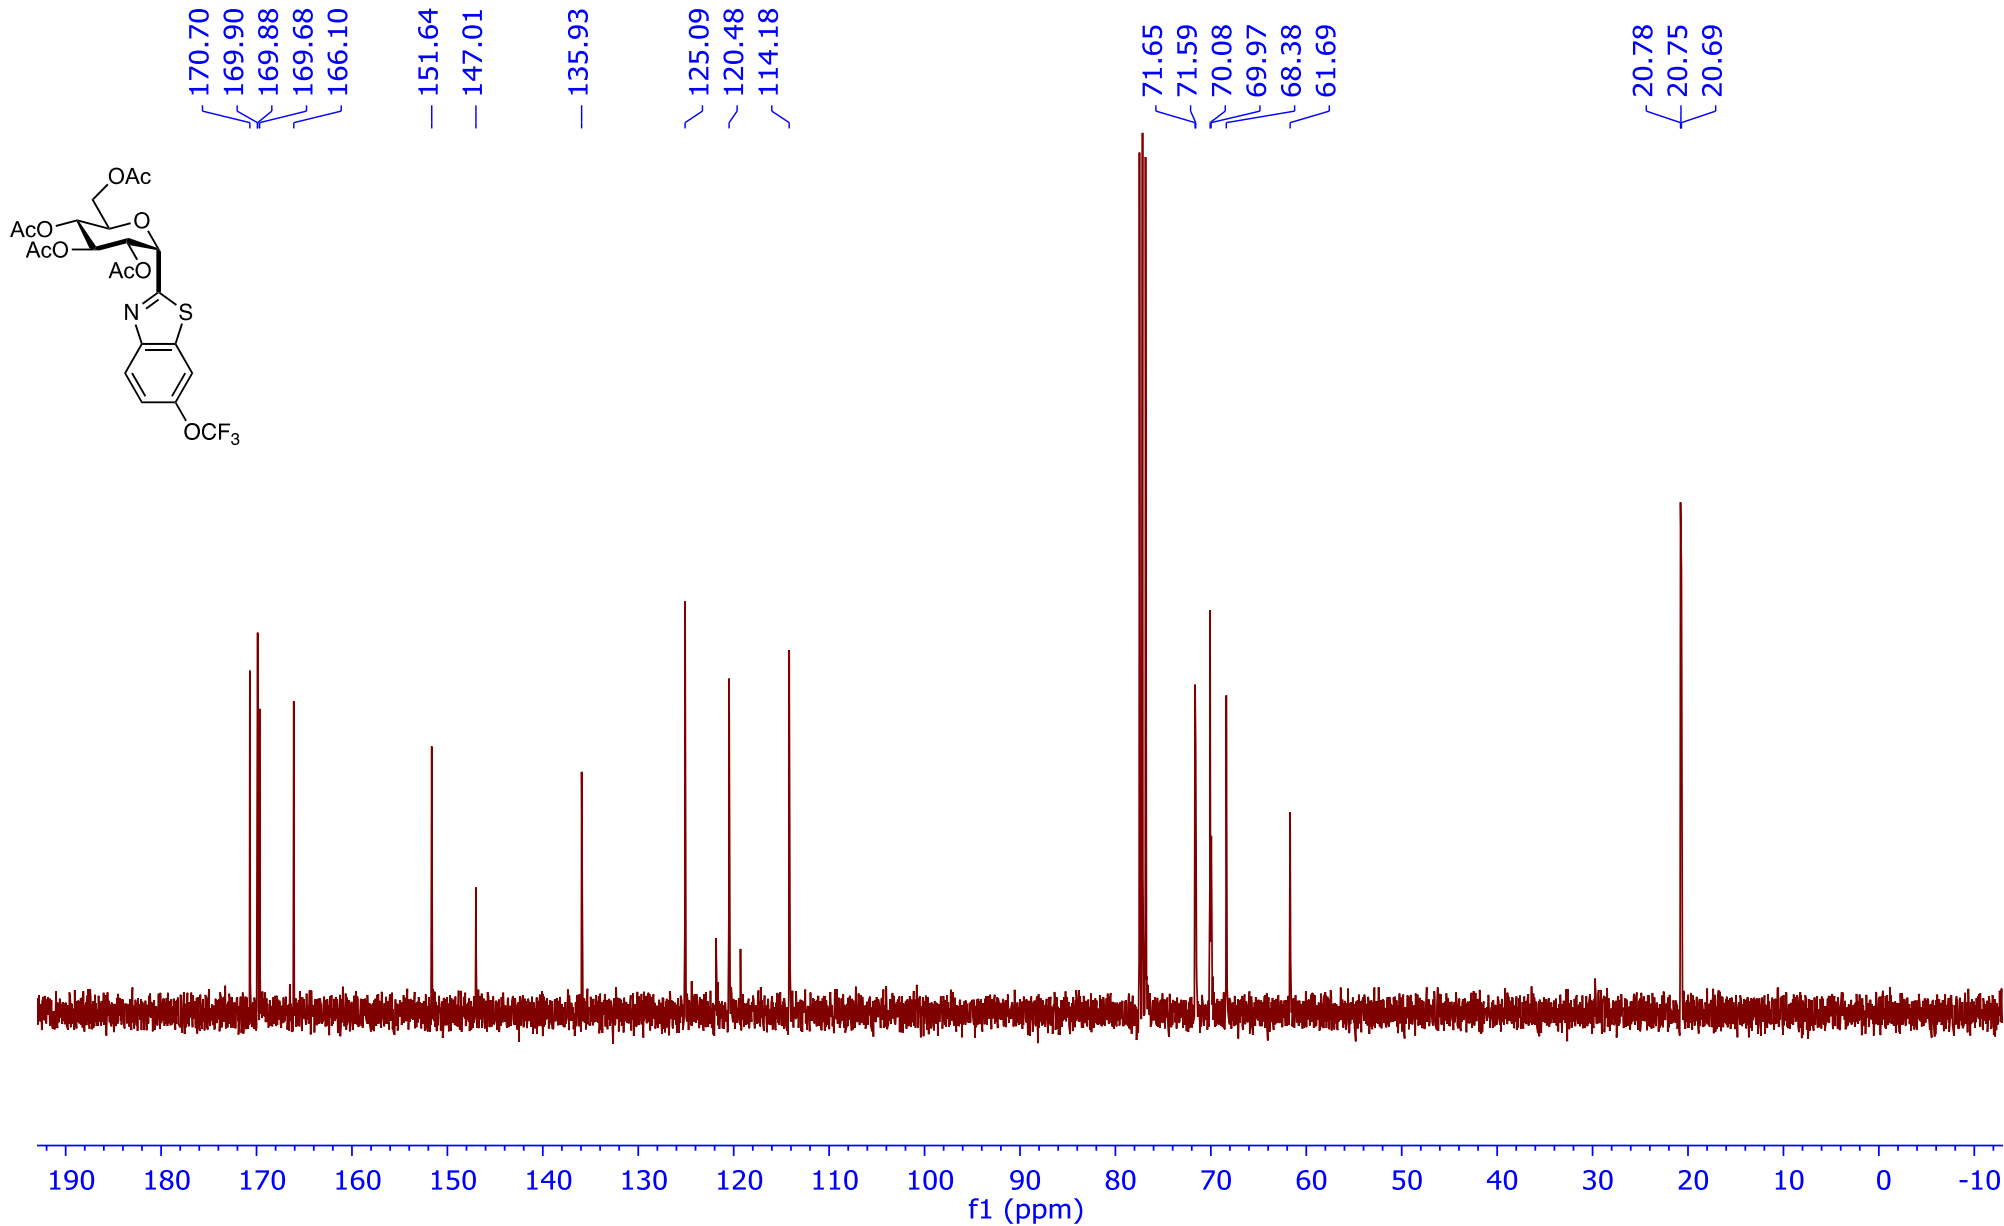

<sup>13</sup>C NMR Spectrum of 18v

CDCI3, 376 MHz

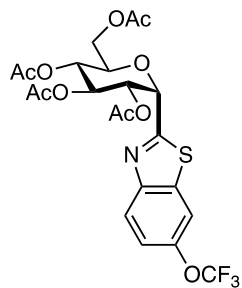

-58.01



<sup>19</sup>F NMR Spectrum of 18v  
S70

CDCI3, 400 MHz

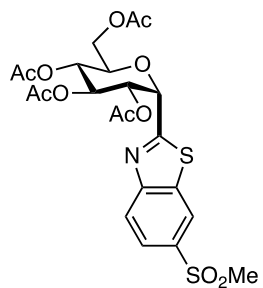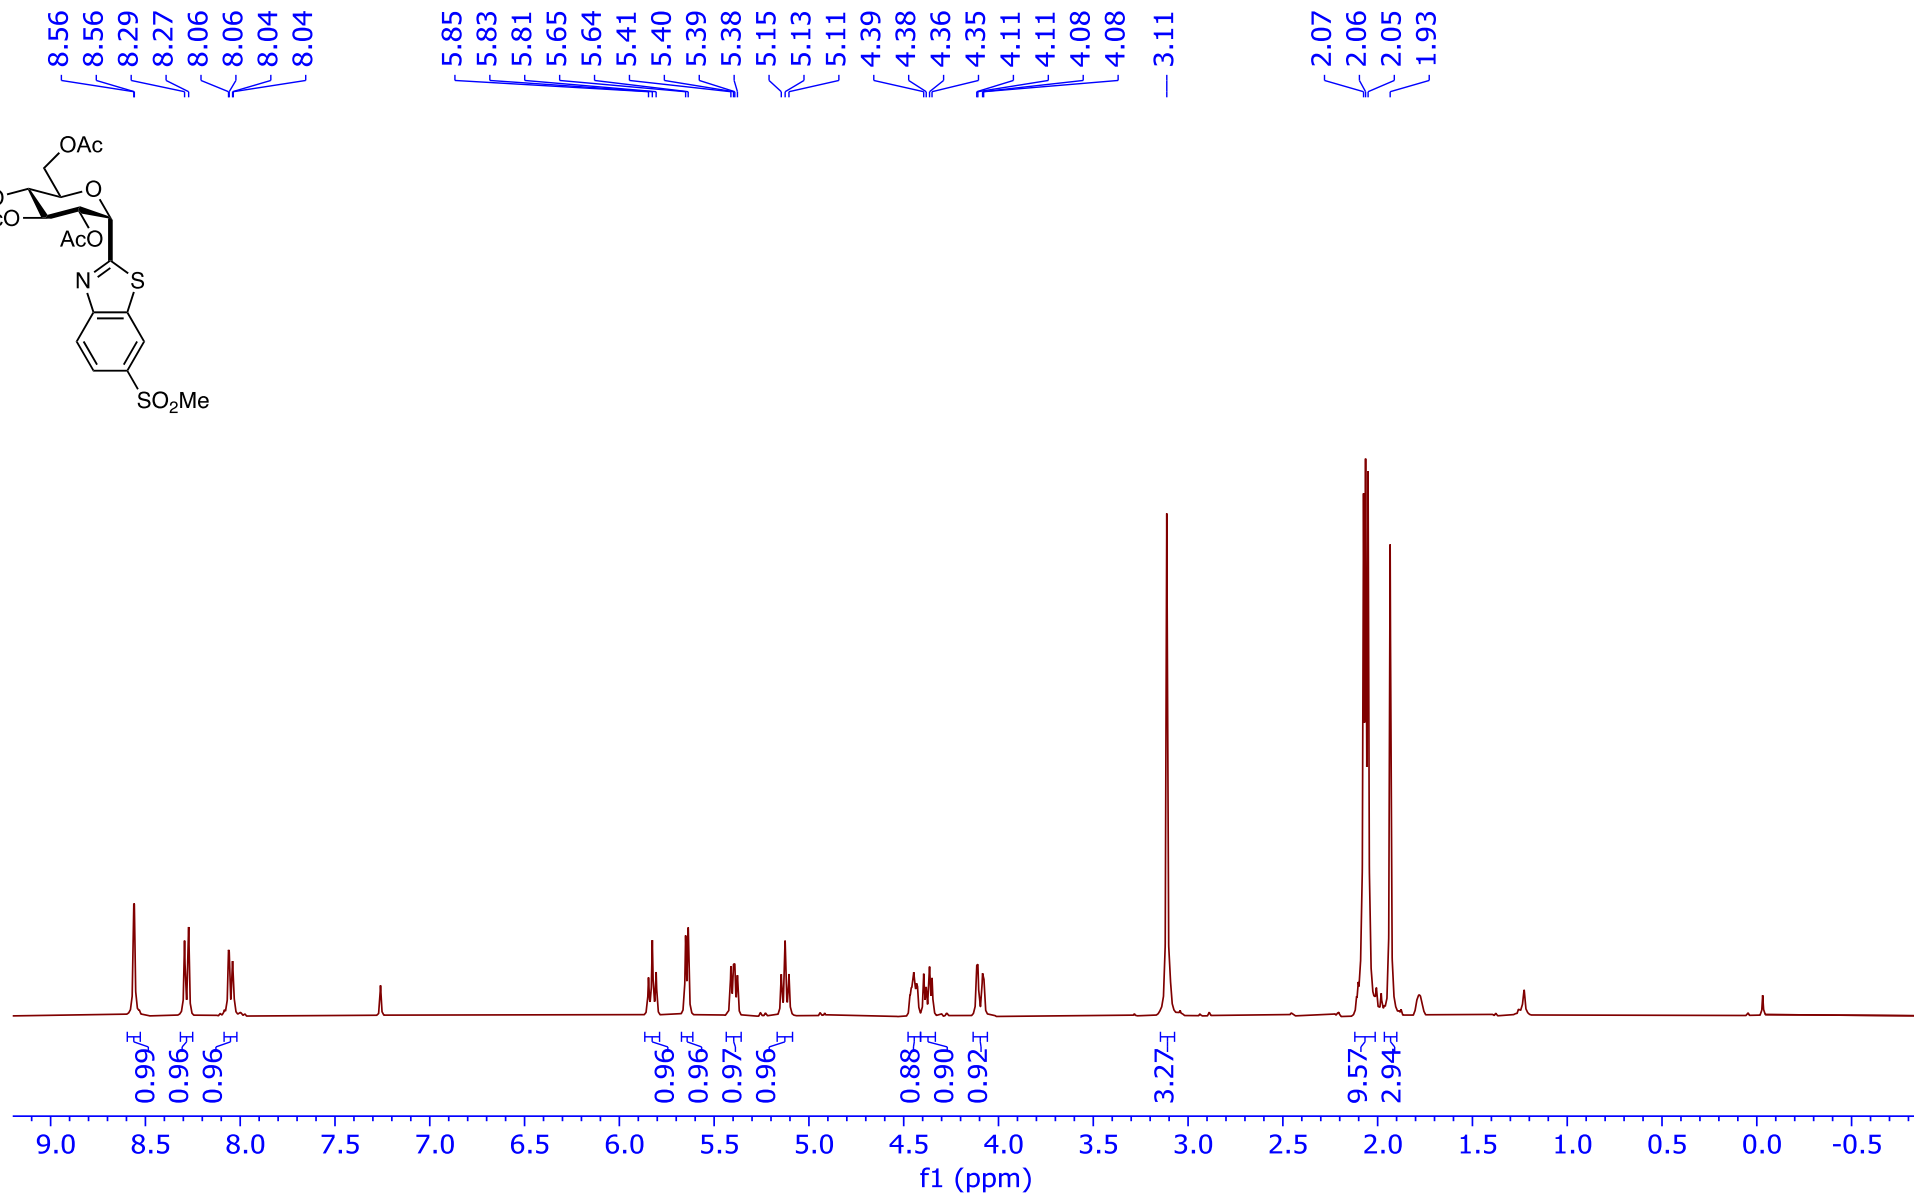

<sup>1</sup>H NMR Spectrum of 18w

CDCI3, 101 MHz

170.71  
170.54  
169.77  
169.75  
169.64

156.06

137.93  
135.59

125.13  
125.01  
122.35

72.13  
71.57  
69.72  
68.11  
61.55

44.92

20.82  
20.78  
20.70

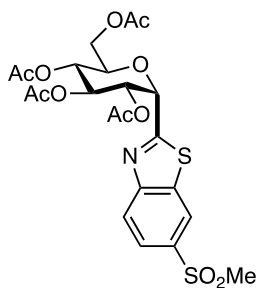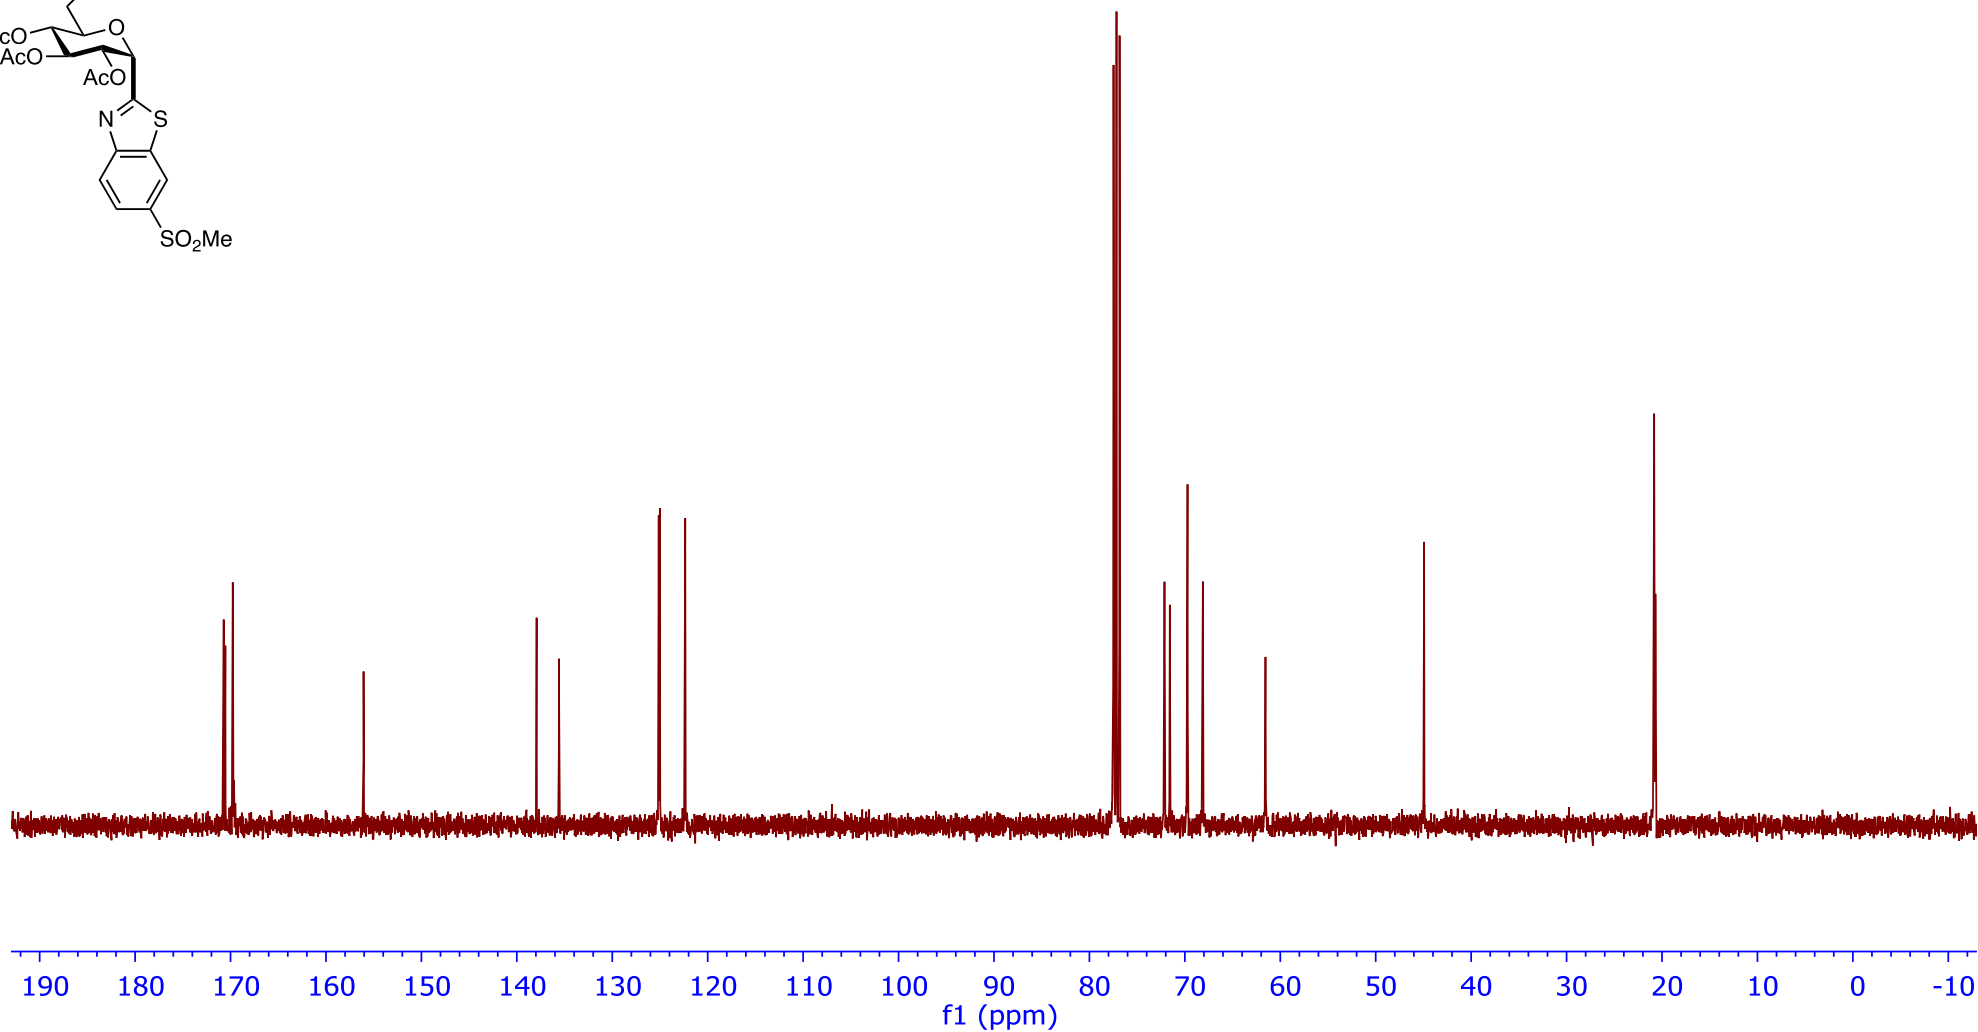

<sup>13</sup>C NMR Spectrum of 18w



CDCl<sub>3</sub>, 400 MHz

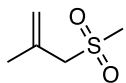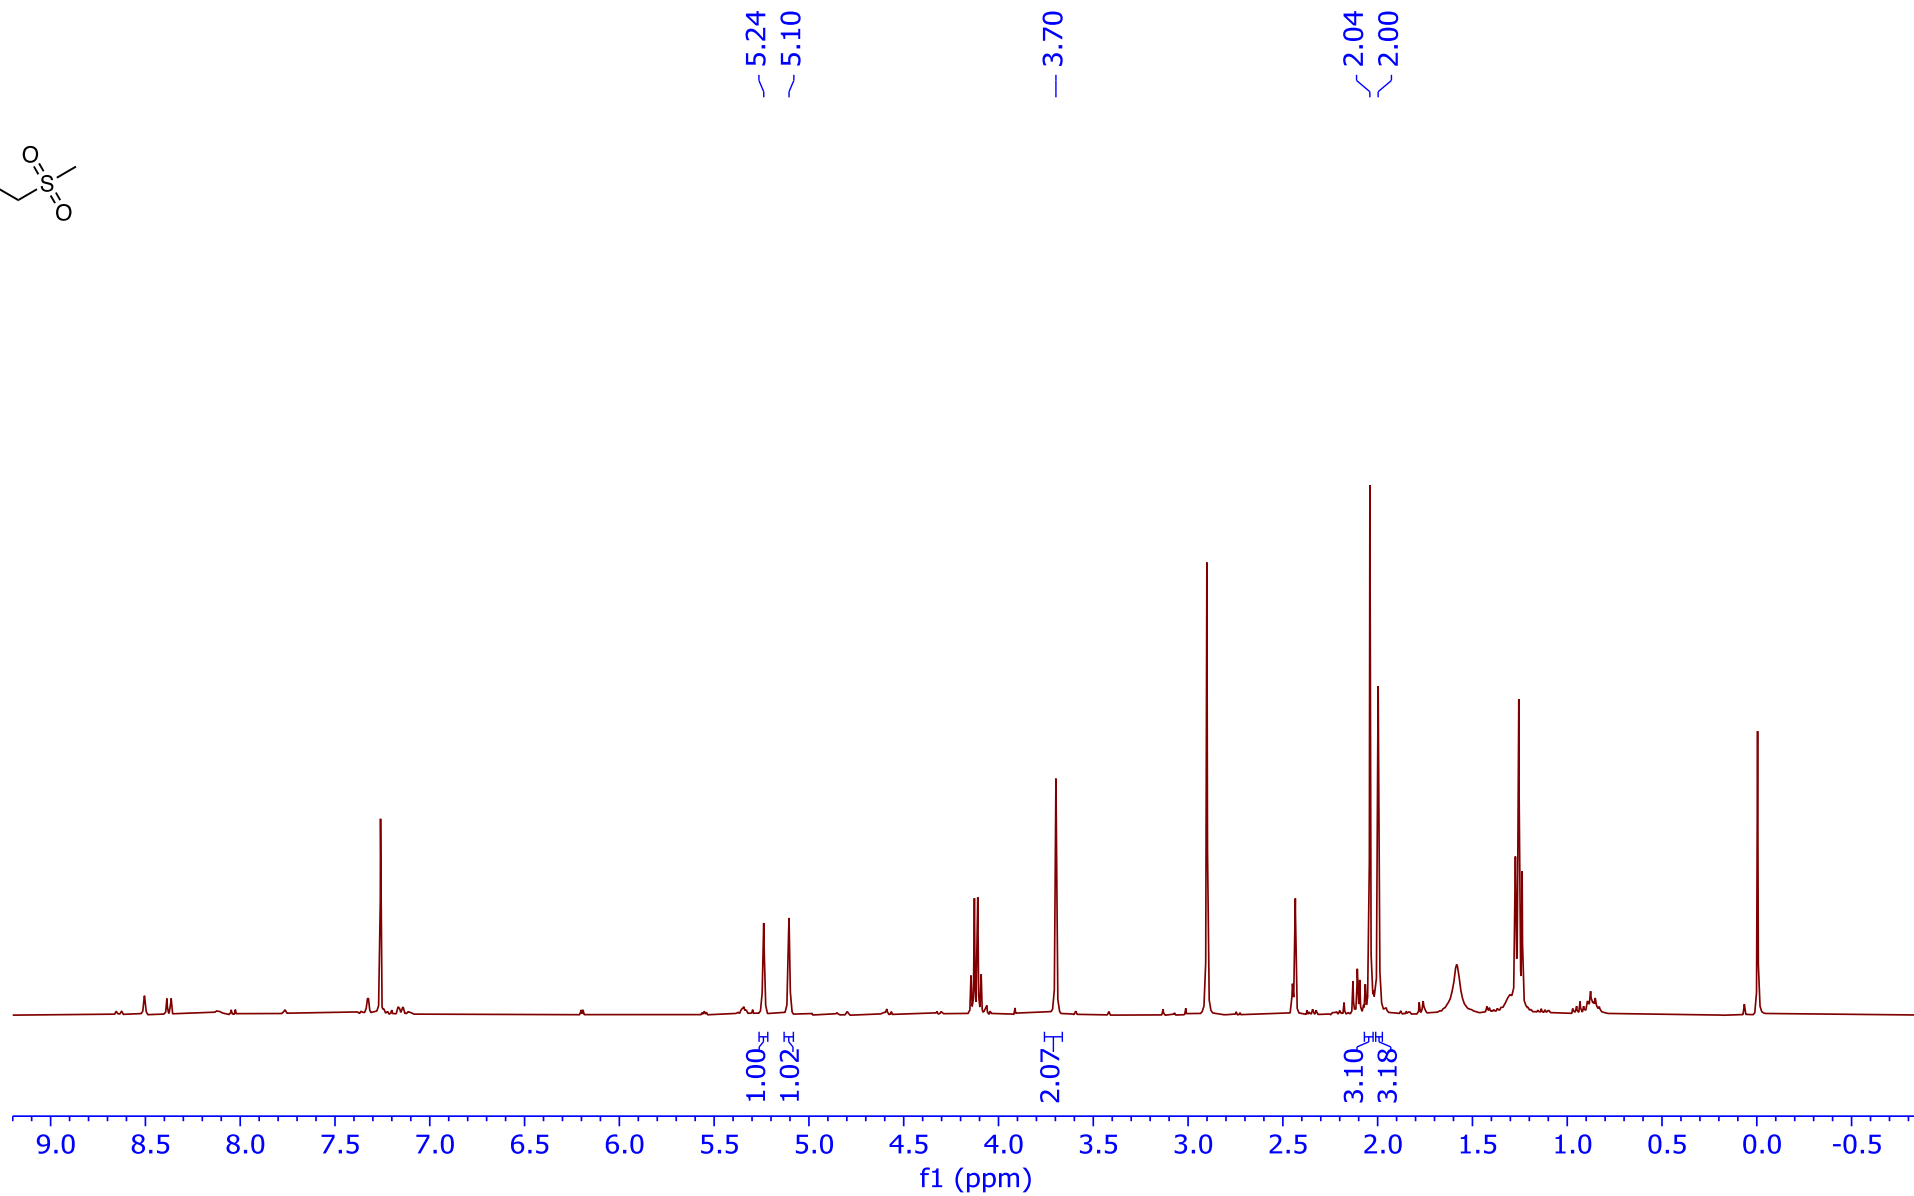

<sup>1</sup>H NMR Spectrum of 19

CDCI3, 101 MHz

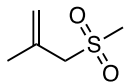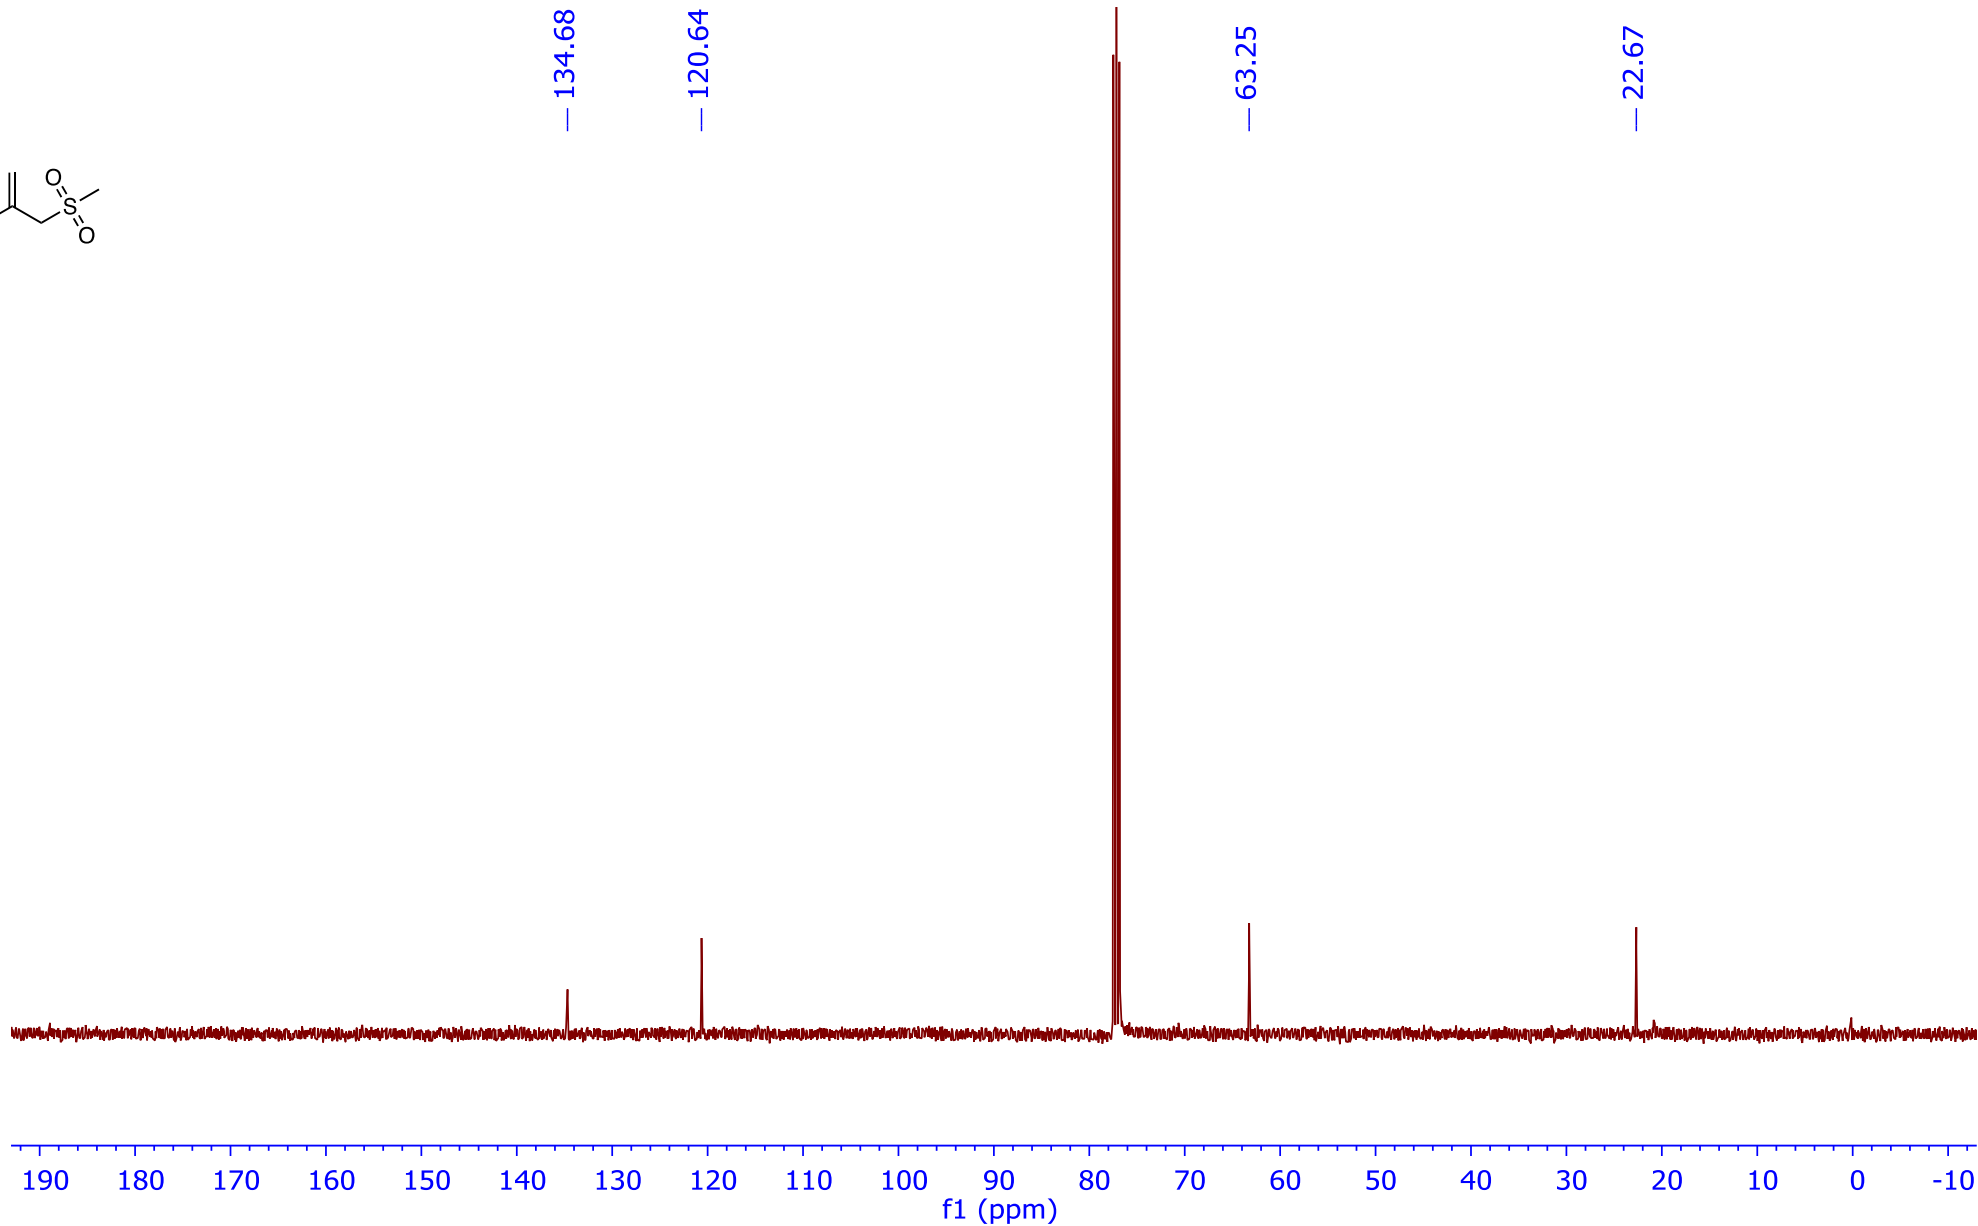

$^{13}\text{C}$  NMR Spectrum of 19  
S74

CDCl<sub>3</sub>, 400 MHz

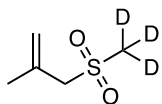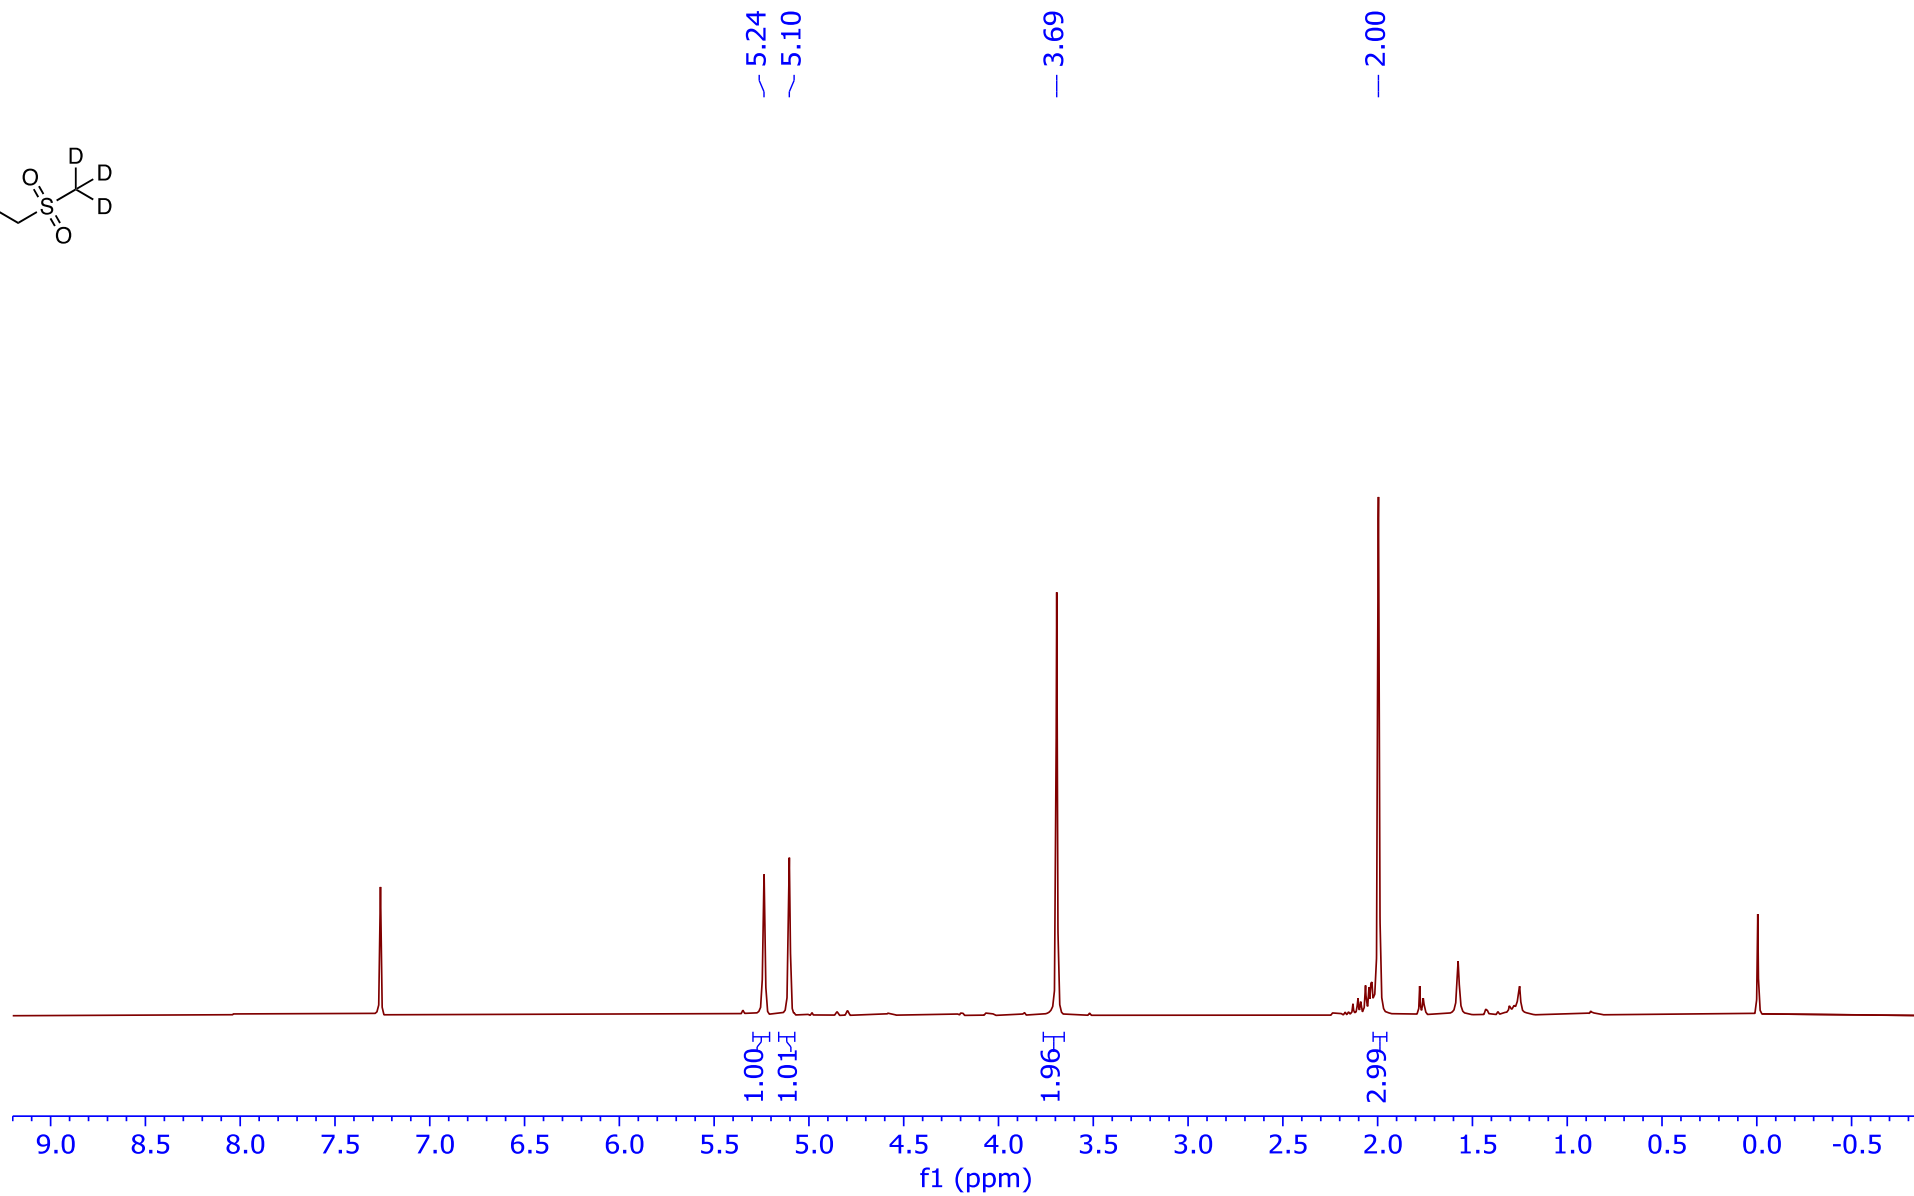

<sup>1</sup>H NMR Spectrum of 21

CDCI3, 101 MHz

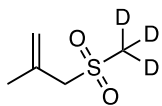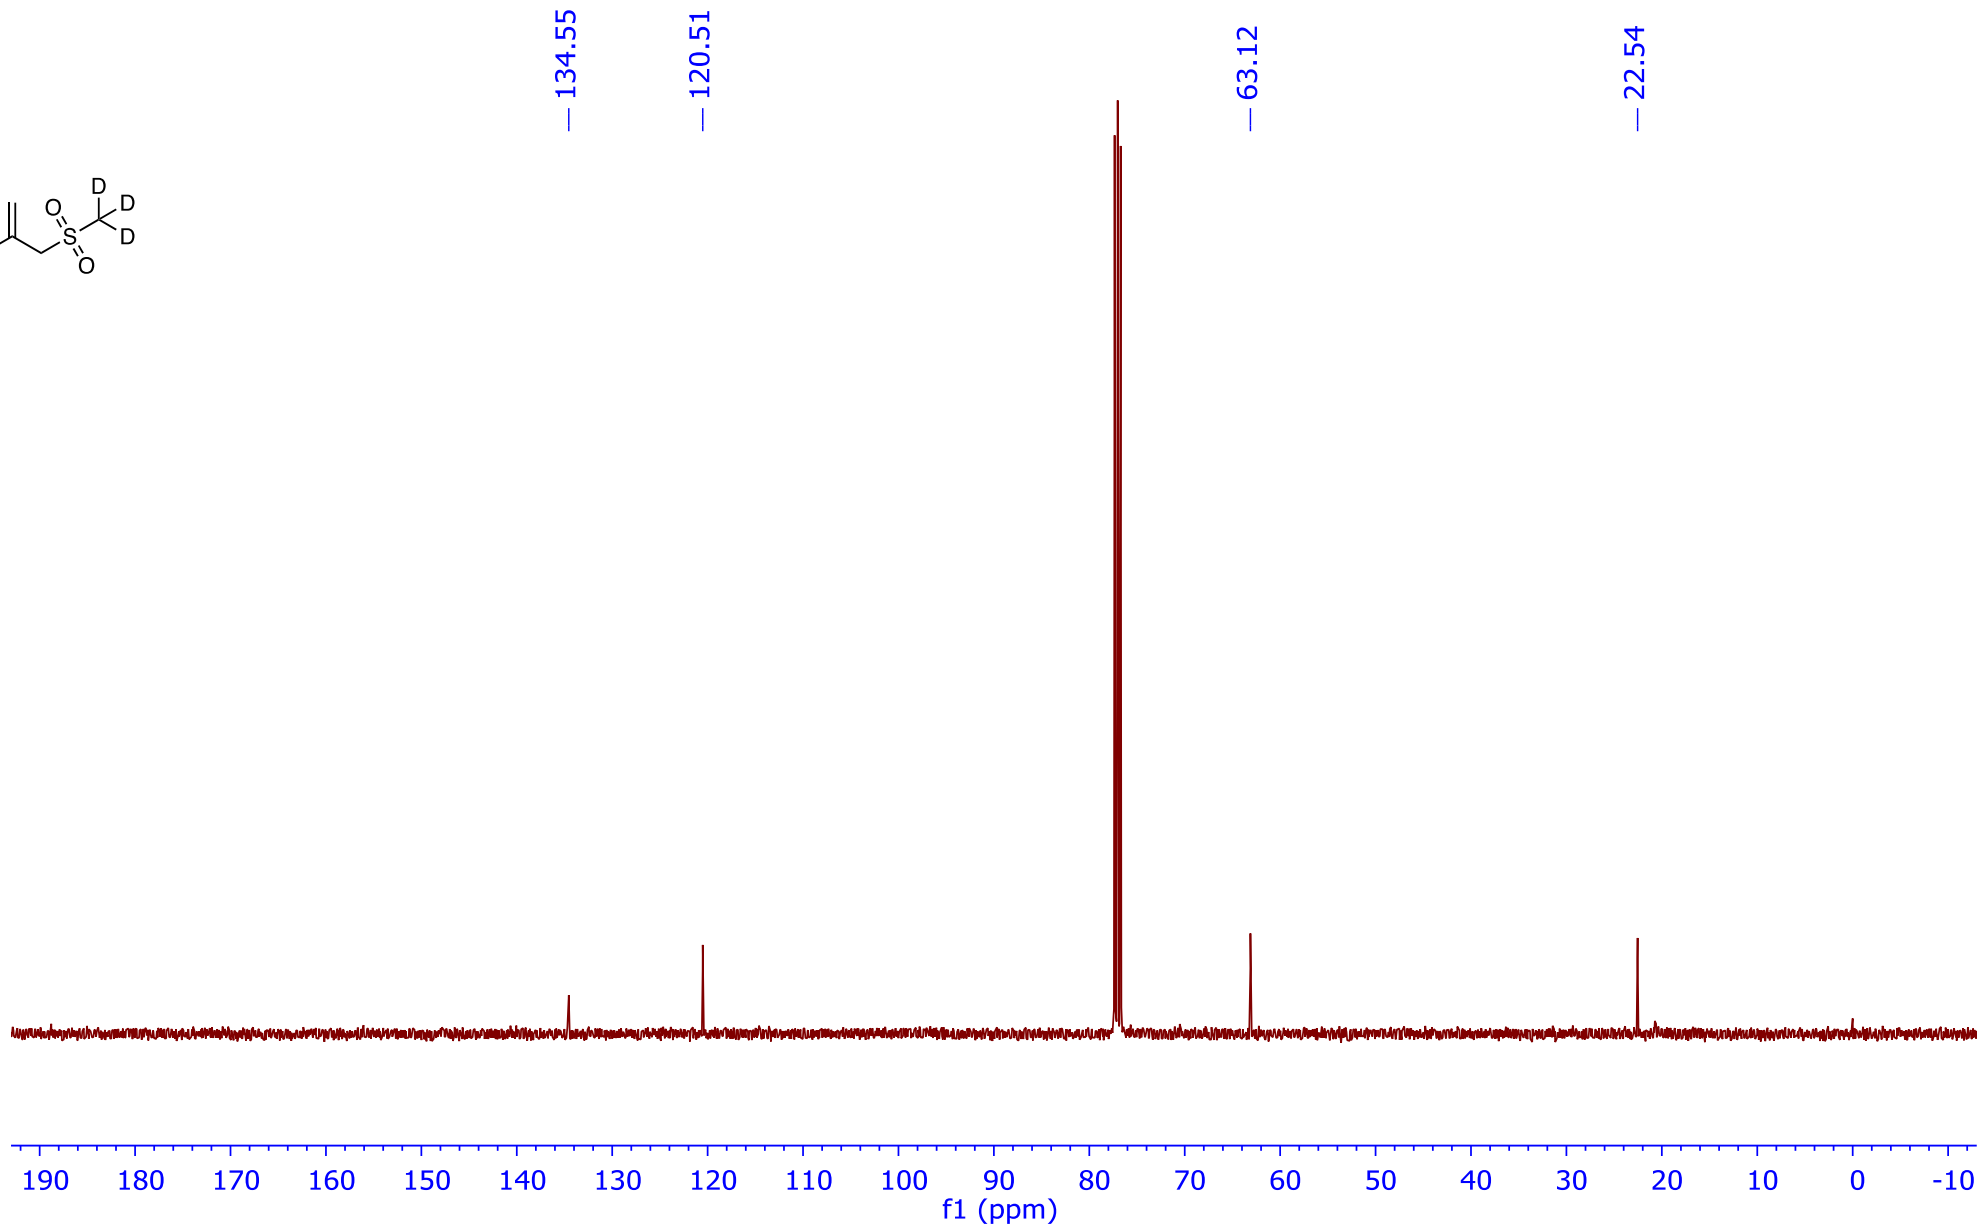

$^{13}\text{C}$  NMR Spectrum of 21  
S76
